# Supplementary material for: Molecular Epidemiology of Salmonellosis in Florida, USA, 2017–2018
Source: Front Med (Lausanne). 2021 Apr 22;8:656827. doi: 10.3389/fmed.2021.656827 (PMC8100233; doi:10.3389/fmed.2021.656827)
Supplement: Supplementary file 2 [file Data_Sheet_2.csv]

Strain	NCBI_ACCESSION	SISTR1_Serotype	PFGE XbaI pattern	ST_7MLST	eBG_7MLST	HC5_cgMLST	HC2_cgMLST	IsolatDate	Age	Gender	Ethnicity	Source Niche	Source Site	COUNTYNAME
PNUSAS047157	SAMN09722387	I 4,[5],12:i:-	JPXX01.3346	34	1	6	178635	4/12/18	4	FEMALE	UNKNOWN	Human	stool	PALM BEACH
PNUSAS053370	SAMN09989952	I 4,[5],12:i:-	JPXX01.3775	34	1	6	57020	6/17/18	9	MALE	HISPANIC	Human	stool	DADE
PNUSAS053371	SAMN09989951	I 4,[5],12:i:-	JPXX01.3775	34	1	6	169282	6/17/18	12	MALE	HISPANIC	Human	stool	DADE
PNUSAS048831	SAMN09761624	I 4,[5],12:i:-	JPXX01.5522	34	1	6	168149	4/19/18	4	FEMALE	HISPANIC	Human	stool	DADE
PNUSAS053258	SAMN09989927	I 4,[5],12:i:-	JPXX01.1314	34	1	6	166975	6/14/18	69	FEMALE	HISPANIC	Human	stool	DADE
PNUSAS046220	SAMN09655064	Typhimurium	JPXX01.5522	34	1	6	137648	4/24/18	33	FEMALE	HISPANIC	Human	stool	DADE
PNUSAS045286	SAMN09537505	I 4,[5],12:i:-	JPXX01.1314	34	1	6	6	5/9/18	18	MALE	UNKNOWN	Human	stool	OSCEOLA
PNUSAS026553	SAMN07795655	I 4,[5],12:i:-	JPXX01.1314	34	1	6	94130	4/26/17	1	MALE	HISPANIC	Human	stool	POLK
PNUSAS020163	SAMN07436226	I 4,[5],12:i:-	JPXX01.1314	34	1	6	6	5/29/17	76	FEMALE	HISPANIC	Human	stool	DADE
PNUSAS017681	SAMN07352365	I 4,[5],12:i:-	JPXX01.1314	34	1	6	6	6/10/17	0	MALE	NHISPANIC	Human	stool	DUVAL
PNUSAS011538	SAMN06708765	I 4,[5],12:i:-	JPXX01.3034	34	1	6	68744	3/4/17	60	FEMALE	UNKNOWN	Human	stool	DESOTO
PNUSAS012586	SAMN06847185	Saintpaul	JN6X01.0072	27	14	79	1021	3/13/17	3	FEMALE	UNKNOWN	Human	stool	COLLIER
PNUSAS018355	SAMN07352347	Enteritidis	JEGX01.0021	11	4	85	10207	5/14/17	86	MALE	NHISPANIC	Human	stool	CHARLOTTE
PNUSAS013892	SAMN07143130	Enteritidis	JEGX01.0004	11	4	85	47689	4/17/17	20	FEMALE	NHISPANIC	Human	stool	BREVARD
PNUSAS013896	SAMN07143134	Enteritidis	JEGX01.0021	11	4	85	85	4/17/17	1	MALE	HISPANIC	Human	stool	OSCEOLA
PNUSAS054371	SAMN10079055	Enteritidis	JEGX01.0002	11	4	87	918	7/12/18	55	FEMALE	UNKNOWN	Human	stool	DADE
PNUSAS042166	SAMN09379930	Enteritidis	JEGX01.0002	11	4	87	117326	4/9/18	54	MALE	HISPANIC	Human	stool	DADE
PNUSAS028304	SAMN08053139	Enteritidis	JEGX01.0002	11	4	87	79738	8/29/17	30	MALE	NHISPANIC	Human	stool	ORANGE
PNUSAS018326	SAMN07414503	Enteritidis	JEGX01.0002	11	4	87	87	6/2/17	62	MALE	UNKNOWN	Human	stool	PALM BEACH
PNUSAS020171	SAMN07436234	Enteritidis	JEGX01.0020	11	4	87	87	6/11/17	59	FEMALE	NHISPANIC	Human	stool	MARTIN
PNUSAS017641	SAMN07414531	Enteritidis	JEGX01.0002	11	4	87	87	4/7/17	17	FEMALE	HISPANIC	Human	stool	SEMINOLE
PNUSAS017684	SAMN07352368	Enteritidis	JEGX01.0024	11	4	87	87	6/5/17	54	FEMALE	HISPANIC	Human	stool	POLK
PNUSAS028297	SAMN08053132	Enteritidis	JEGX01.0002	11	4	87	87	4/10/17	80	MALE	UNKNOWN	Human	stool	SUMTER
PNUSAS016931	SAMN07352810	Enteritidis	JEGX01.0002	11	4	87	87	5/29/17	37	FEMALE	NHISPANIC	Human	stool	BROWARD
PNUSAS014736	SAMN07197355	Enteritidis	JPPX01.0001	11	4	87	87	4/26/17	49	FEMALE	NHISPANIC	Human	stool	NA
PNUSAS013689	SAMN07138680	Enteritidis	JEGX01.0002	11	4	87	87	4/20/17	8	FEMALE	NHISPANIC	Human	stool	NA
PNUSAS013688	SAMN07138679	Enteritidis	JEGX01.0002	11	4	87	71505	4/18/17	8	FEMALE	HISPANIC	Human	stool	DADE
PNUSAS016136	SAMN07227126	Enteritidis	JEGX01.0184	11	4	87	87	1/1/17	1	MALE	NHISPANIC	Human	stool	DADE
PNUSAS011959	SAMN06756765	Thompson	JP6X01.0009	26	28	119	68942	3/20/17	70	MALE	UNKNOWN	Human	stool	BREVARD
PNUSAS009474	SAMN06462390	Thompson	JEGX01.1057	26	28	119	119	1/20/17	56	FEMALE	NHISPANIC	Human	stool	BROWARD
PNUSAS013662	SAMN07138684	Berta	JAXX01.0001	435	99	125	71762	4/22/17	51	FEMALE	NHISPANIC	Human	stool	PINELLAS
PNUSAS053368	SAMN09989933	Enteritidis	JEGX01.0004	11	4	150	169289	6/12/18	66	FEMALE	NHISPANIC	Human	stool	MARION
PNUSAS054389	SAMN10088543	Enteritidis	JEGX01.0034	11	4	150	123047	6/16/18	40	FEMALE	NHISPANIC	Human		SARASOTA
PNUSAS032263	SAMN08383942	Enteritidis	JEGX01.0004	11	4	150	68567	10/25/17	0	FEMALE	NHISPANIC	Human		DUVAL
PNUSAS021441	SAMN07571925	Enteritidis	JEGX01.0004	11	4	150	4151	7/10/17	49	FEMALE	NHISPANIC	Human	stool	BREVARD
PNUSAS021423	SAMN07568805	Enteritidis	JEGX01.0004	11	4	150	8440	7/14/17	45	MALE	NHISPANIC	Human	BLOOD	DUVAL
PNUSAS018884	SAMN07436595	Enteritidis	JEGX01.0004	11	4	150	4151	6/1/17	4	FEMALE	NHISPANIC	Human	stool	DUVAL
PNUSAS017663	SAMN07414536	Enteritidis	JEGX01.0004	11	4	150	72875	4/17/17	2	FEMALE	UNKNOWN	Human	stool	DUVAL
PNUSAS018352	SAMN07352344	Enteritidis	JEGX01.0004	11	4	150	4151	5/9/17	61	FEMALE	UNKNOWN	Human	stool	PALM BEACH
PNUSAS016341	SAMN07269337	Enteritidis	JEGX01.0004	11	4	150	8440	3/27/17	57	FEMALE	UNKNOWN	Human	stool	OSCEOLA
PNUSAS016339	SAMN07269335	Enteritidis	JEGX01.0004	11	4	150	8440	3/27/17	30	FEMALE	UNKNOWN	Human	stool	ORANGE
PNUSAS014746	SAMN07197378	Enteritidis	JEGX01.0034	11	4	150	8440	4/21/17	9	MALE	HISPANIC	Human	stool	DADE
PNUSAS013878	SAMN07143116	Enteritidis	JEGX01.0004	11	4	150	8440	4/6/17	3	MALE	UNKNOWN	Human	stool	HILLSBOROUGH
PNUSAS013968	SAMN07159306	Enteritidis	JEGX01.0004	11	4	150	4151	3/28/17	71	MALE	NHISPANIC	Human	stool	HILLSBOROUGH
PNUSAS013969	SAMN07159307	Enteritidis	JEGX01.0034	11	4	150	68858	3/27/17	25	FEMALE	NHISPANIC	Human	stool	SARASOTA
PNUSAS040595	SAMN09206731	Enteritidis	JEGX01.0034	11	4	165	165	4/5/18	23	FEMALE	UNKNOWN	Human	stool	DADE
PNUSAS040570	SAMN09197808	Enteritidis	JEGX01.0004	11	4	165	165	3/15/18	26	FEMALE	HISPANIC	Human	stool	DADE
PNUSAS011947	SAMN06756755	Enteritidis	JEGX01.0004	11	4	165	165	3/22/17	18	FEMALE	NHISPANIC	Human	stool	BROWARD
PNUSAS030948	SAMN08235403	Typhimurium	JPXX01.1212	19	1	168	90074	10/30/17	4	MALE	UNKNOWN	Human	stool	DADE
PNUSAS015616	SAMN07247107	Enteritidis	JEGX01.0002	11	4	171	171	5/17/17	55	MALE	UNKNOWN	Human	stool	MANATEE
PNUSAS017692	SAMN07352375	Enteritidis	JEGX01.0005	11	4	177	78659	6/16/17	54	FEMALE	NHISPANIC	Human	stool	NA
PNUSAS018337	SAMN07352329	Enteritidis	JEGX01.0005	11	4	177	184	4/25/17	6	FEMALE	NHISPANIC	Human	stool	ALACHUA
PNUSAS055785	SAMN10133814	Enteritidis	JEGX01.0021	11	4	182	114205	5/30/18	55	MALE	NHISPANIC	Human	stool	LEE
PNUSAS048845	SAMN09763806	Enteritidis	JEGX01.0021	11	4	182	117653	4/26/18	17	FEMALE	HISPANIC	Human	BLOOD	DADE
PNUSAS049968	SAMN09813333	Enteritidis	JEGX01.0021	11	4	182	83883	5/20/18	79	FEMALE	UNKNOWN	Human		DADE
PNUSAS040572	SAMN09206698	Enteritidis	JEGX01.0021	11	4	182	3334	3/21/18	23	MALE	HISPANIC	Human	stool	BROWARD
PNUSAS017645	SAMN07370926	Enteritidis	JEGX01.0004	11	4	182	3132	4/10/17	25	FEMALE	NHISPANIC	Human	stool	MARION
PNUSAS017051	SAMN07352800	Enteritidis	JEGX01.0023	11	4	182	41659	5/5/17	44	FEMALE	NHISPANIC	Human	stool	MARION
PNUSAS017039	SAMN07342233	Enteritidis	JEGX01.0021	11	4	182	3334	5/2/17	64	FEMALE	UNKNOWN	Human	stool	HILLSBOROUGH
PNUSAS016950	SAMN07342215	Enteritidis	JEGX01.0021	11	4	182	60809	3/23/17	6	FEMALE	UNKNOWN	Human	stool	HILLSBOROUGH
PNUSAS016340	SAMN07269336	Enteritidis	JEGX01.0021	11	4	182	41659	3/27/17	55	FEMALE	NHISPANIC	Human	stool	SANTA ROSA
PNUSAS015125	SAMN07202688	Enteritidis	JEGX01.0021	11	4	182	63076	5/2/17	81	MALE	NHISPANIC	Human	stool	HENDRY
PNUSAS015113	SAMN07202676	Enteritidis	JEGX01.0021	11	4	182	64255	5/11/17	49	FEMALE	NHISPANIC	Human	stool	POLK
PNUSAS014738	SAMN07197357	Enteritidis	JEGX01.0021	11	4	182	41659	4/25/17	0	FEMALE	NHISPANIC	Human	stool	DUVAL
PNUSAS038671	SAMN08955949	Enteritidis	JEGX01.0021	11	4	182	41659	2/18/18	17	FEMALE	HISPANIC	Human	stool	DADE
PNUSAS038670	SAMN08955950	Enteritidis	JEGX01.0021	11	4	182	41659	2/17/18	58	FEMALE	HISPANIC	Human	stool	DADE
PNUSAS038689	SAMN08930269	Enteritidis	JEGX01.0002	11	4	241	92410	9/24/17	49	MALE	UNKNOWN	Human	stool	ORANGE
PNUSAS035580	SAMN08815115	Aberdeen		2262	304	311	114752	1/7/18	1	MALE	UNKNOWN	Human	stool	DUVAL
PNUSAS035579	SAMN08815116	Aberdeen		2262	304	311	114752	1/8/18	73	FEMALE	UNKNOWN	Human	stool	CHARLOTTE
PNUSAS047154	SAMN09722389	Typhimurium	JPXX01.0014	19	1	373	373	4/11/18	19	FEMALE	HISPANIC	Human	stool	DADE
PNUSAS027231	SAMN07842082	I 4,[5],12:i:-	JPXX01.2583	34	1	576	114419	10/5/17	14	MALE	NHISPANIC	Human	stool	BROWARD
PNUSAS027611	SAMN08007403	I 4,[5],12:i:-	JPXX01.2583	34	1	576	102362	10/1/17	38	FEMALE	NHISPANIC	Human	stool	BROWARD
PNUSAS016334	SAMN07269329	I 4,[5],12:i:-	JPXX01.3877	34	1	576	917	5/24/17	1	MALE	NHISPANIC	Human	stool	BROWARD
PNUSAS013893	SAMN07143131	I 4,[5],12:i:-	JPXX01.3877	34	1	576	917	4/10/17	9	MALE	NHISPANIC	Human	stool	POLK
PNUSAS016450	SAMN07342182	Enteritidis	JEGX01.0005	11	4	580	77753	3/30/17	13	MALE	NHISPANIC	Human	stool	POLK
PNUSAS010645	SAMN06641754	Enteritidis	JEGX01.0005	11	4	580	68424	3/1/17	45	MALE	HISPANIC	Human	stool	HILLSBOROUGH
PNUSAS011238	SAMN06708770	Enteritidis	JEGX01.0004	11	4	585	68404	3/19/17	77	MALE	NHISPANIC	Human	BLOOD	CITRUS
PNUSAS014743	SAMN07197362	IV 50:g,z51:-		2197	23	608	74785	4/15/17	36	MALE	NHISPANIC	Human		LEON
PNUSAS052504	SAMN09937761	Enteritidis	JEGX01.0021	11	4	614	614	6/5/18	47	MALE	NHISPANIC	Human	stool	ST. LUCIE
PNUSAS044928	SAMN09650509	Enteritidis	JEGX01.0004	11	4	614	614	3/27/18	43	MALE	NHISPANIC	Human	stool	PASCO
PNUSAS040591	SAMN09206708	Enteritidis	JEGX01.0004	11	4	614	614	3/30/18	3	FEMALE	NHISPANIC	Human	stool	MARTIN
PNUSAS039210	SAMN08963962	Enteritidis	JEGX01.0021	11	4	614	614	3/1/18	40	MALE	UNKNOWN	Human
PNUSAS028312	SAMN08053147	Enteritidis	JEGX01.0034	11	4	614	614	8/28/17	62	FEMALE	UNKNOWN	Human	stool	ORANGE
PNUSAS024341	SAMN07715090	Enteritidis	JEGX01.0021	11	4	614	614	6/13/17	68	FEMALE	UNKNOWN	Human	stool	DADE
PNUSAS024613	SAMN07715097	Enteritidis	JEGX01.0021	11	4	614	91448	5/31/17	18	MALE	NHISPANIC	Human	stool	MARTIN
PNUSAS017031	SAMN07342225	Enteritidis	JEGX01.0023	11	4	614	614	6/7/17	30	MALE	NHISPANIC	Human	stool	DUVAL
PNUSAS013976	SAMN07197379	Enteritidis	JEGX01.0021	11	4	614	614	3/21/17	0	MALE	UNKNOWN	Human	stool	HILLSBOROUGH
PNUSAS013881	SAMN07143119	Enteritidis	JEGX01.0021	11	4	614	614	3/29/17	30	MALE	UNKNOWN	Human	stool	TAYLOR
PNUSAS012579	SAMN06847181	Enteritidis	JEGX01.0021	11	4	614	614	4/7/17	72	FEMALE	UNKNOWN	Human	stool	NA
PNUSAS029004	SAMN08105173	Enteritidis	JEGX01.0021	11	4	614	614	11/2/17	68	FEMALE	NHISPANIC	Human	stool	POLK
PNUSAS011229	SAMN06677817	Enteritidis	JEGX01.0021	11	4	614	614	3/12/17	26	MALE	HISPANIC	Human	BLOOD	POLK
PNUSAS039212	SAMN08963960	Enteritidis	JEGX01.0021	11	4	614	614	2/25/18	33	FEMALE	HISPANIC	Human	stool
PNUSAS010092	SAMN06564762	Anatum	JAGX01.0013	64	65	694	12437	2/21/17	68	FEMALE	NHISPANIC	Human	URINE	ESCAMBIA
PNUSAS011065	SAMN06662217	IIIb 61:i:z50		1847	383	722	68296	1/18/17	1	MALE	NHISPANIC	Human	stool	PASCO
PNUSAS027049	SAMN07830242	Heidelberg	JF6X01.0582	15	26	809	95457	10/6/17	86	FEMALE	NHISPANIC	Human	URINE	COLUMBIA
PNUSAS009305	SAMN06462387	Newport	JJPX01.0010	132	7	938	938	2/6/17	87	FEMALE	NHISPANIC	Human	URINE	BROWARD
PNUSAS012894	SAMN06924424	I 4,[5],12:i:-	JPXX01.1420	34	1	1376	1544	3/18/17	7	FEMALE	NHISPANIC	Human	stool	BROWARD
PNUSAS008065	SAMN06283460	Typhi	JPPX01.0148	1	13	1452	1452	1/15/17	9	MALE	NHISPANIC	Human	stool	PALM BEACH
PNUSAS036149	SAMN08772927	I 4,[5],12:i:-	JPXX01.2311	34	1	1587	111549	1/14/18	71	FEMALE	HISPANIC	Human	stool	DADE
PNUSAS036147	SAMN08772929	I 4,[5],12:i:-	JPXX01.2311	34	1	1587	111549	1/11/18	1	MALE	NHISPANIC	Human	stool	DADE
PNUSAS017436	SAMN07352824	Mbandaka	TDRX01.0067	413	62	1919	47455	6/2/17	0	FEMALE	NHISPANIC	Human	stool	BAY
PNUSAS016335	SAMN07269330	Enteritidis	JEGX01.0004	11	4	2002	2002	5/27/17	77	MALE	NHISPANIC	Human	stool	PALM BEACH
PNUSAS040571	SAMN09206699	Enteritidis	JEGX01.0004	11	4	2301	2301	3/21/18	57	MALE	NHISPANIC	Human	stool	BROWARD
PNUSAS040009	SAMN09101209	Enteritidis	JEGX01.0004	11	4	2301	2301	3/7/18	35	FEMALE	HISPANIC	Human	stool	DADE
PNUSAS011993	SAMN06756767	Typhi	JPPX01.0506	1	13	2347	68941	3/27/17	3	MALE	NHISPANIC	Human	BLOOD	ST. JOHNS
PNUSAS011954	SAMN06756763	Typhi	JPPX01.0506	1	13	2347	68909	3/20/17	1	FEMALE	NHISPANIC	Human	BLOOD	BAY
PNUSAS035444	SAMN08622698	Typhimurium	JBPX01.0205	19	1	2577	110813	11/20/17	61	MALE	HISPANIC	Human	stool	DADE
PNUSAS018362	SAMN07352353	Enteritidis	JEGX01.0004	11	4	2705	78711	5/16/17	72	FEMALE	NHISPANIC	Human	stool	OKALOOSA
PNUSAS018361	SAMN07352352	Enteritidis	JEGX01.0004	11	4	2705	78711	5/16/17	52	FEMALE	NHISPANIC	Human	stool	SANTA ROSA
PNUSAS017049	SAMN07352798	Enteritidis	JEGX01.0034	11	4	2705	78654	5/16/17	66	FEMALE	NHISPANIC	Human	stool	ALACHUA
PNUSAS013299	SAMN06924454	Enteritidis	JEGX01.0005	11	4	3213	11457	3/24/17	71	MALE	NHISPANIC	Human	URINE	MARION
PNUSAS010689	SAMN06641751	Enteritidis	JEGX01.0005	11	4	3213	11457	2/27/17	75	MALE	HISPANIC	Human	stool	DADE
PNUSAS010400	SAMN06623953	Enteritidis	JEGX01.0007	11	4	3808	3808	2/15/17	77	FEMALE	UNKNOWN	Human	stool	VOLUSIA
PNUSAS040587	SAMN09206711	Enteritidis	JEGX01.0004	11	4	3809	69941	3/27/18	65	MALE	NHISPANIC	Human	stool	PINELLAS
PNUSAS022589	SAMN07611380	Enteritidis	JEGX01.0004	11	4	3809	3809	6/26/17	33	FEMALE	NHISPANIC	Human	URINE	PINELLAS
PNUSAS015107	SAMN07202670	Ohio		329	72	4041	74750	5/13/17	53	FEMALE	UNKNOWN	Human	URINE	NA
PNUSAS024337	SAMN07715086	Enteritidis	JEGX01.0005	11	4	4551	91574	7/7/17	61	MALE	NHISPANIC	Human		INDIAN RIVER
PNUSAS018344	SAMN07352336	Enteritidis	JEGX01.0005	11	4	4572	12229	4/28/17	61	FEMALE	NHISPANIC	Human	stool	LEE
PNUSAS044181	SAMN09501084	Infantis	JFXX01.0787	32	31	4584	131339	5/8/18	73	FEMALE	NHISPANIC	Human	stool	MANATEE
PNUSAS016933	SAMN07342200	Infantis	JFXX01.0787	32	31	4584	73736	5/15/17	1	MALE	HISPANIC	Human	stool	OSCEOLA
PNUSAS042173	SAMN09379924	Dublin	JDXX01.0004	10	53	4645	124740	4/14/18	81	MALE	NHISPANIC	Human	BLOOD	NA
PNUSAS024338	SAMN07715087	Infantis	JFXX01.0787	32	31	5816	5816	5/5/17	13	FEMALE	NHISPANIC	Human	stool	PALM BEACH
PNUSAS016138	SAMN07227128	Typhi	JPPX01.0026	1	13	6578	75708	1/7/17	30	MALE	NHISPANIC	Human		HILLSBOROUGH
PNUSAS014060	SAMN07159304	Enteritidis	JEGX01.0007	11	4	7836	24471	4/22/17	21	FEMALE	UNKNOWN	Human		DADE
PNUSAS048210	SAMN09763903	Enteritidis	JEGX01.0004	11	4	8045	8045	5/25/18	12	FEMALE	NHISPANIC	Human	stool	BROWARD
PNUSAS011950	SAMN06845818	Heidelberg	JF6X01.0022	15	26	8287	57075	3/23/17	58	FEMALE	NHISPANIC	Human	stool	DUVAL
PNUSAS030154	SAMN08211518	Newport	JJPX01.0381	5	2	8566	14737	11/3/17	41	FEMALE	HISPANIC	Human	stool	DADE
PNUSAS028307	SAMN08053142	Newport	JJPX01.0041	5	2	8566	99147	8/28/17	0	FEMALE	NHISPANIC	Human	stool	CLAY
PNUSAS046216	SAMN09655071	Saintpaul	JN6X01.0048	50	14	9009	137650	4/20/18	59	MALE	NHISPANIC	Human	stool
PNUSAS046211	SAMN09654933	Saintpaul	JN6X01.0048	50	14	9009	137563	4/20/18	50	MALE	NHISPANIC	Human	stool
PNUSAS038693	SAMN08930267	Javiana	JGGX01.0092	24	17	9358	117644	9/26/17	59	MALE	NHISPANIC	Human	stool
PNUSAS022594	SAMN07611387	Enteritidis	JEGX01.0004	11	4	9391	86566	6/5/17	1	FEMALE	NHISPANIC	Human	stool	PALM BEACH
PNUSAS016449	SAMN07342183	Enteritidis	JEGX01.0004	11	4	9391	78219	4/4/17	30	FEMALE	UNKNOWN	Human	stool	HILLSBOROUGH
PNUSAS014741	SAMN07197360	Enteritidis	JEGX01.0004	11	4	9391	74731	4/5/17	57	MALE	NHISPANIC	Human	stool	WALTON
PNUSAS035582	SAMN08868574	Thompson	JP6X01.0001	26	28	10098	155214	1/8/18	33	FEMALE	NHISPANIC	Human	stool	ORANGE
PNUSAS035568	SAMN08815090	Thompson	JP6X01.0001	26	28	10098	114782	1/2/18	19	FEMALE	HISPANIC	Human	stool	SEMINOLE
PNUSAS036139	SAMN08772905	Enteritidis	JEGX01.0004	11	4	10151	10151	12/22/17	56	MALE	NHISPANIC	Human	BLOOD	PALM BEACH
PNUSAS024339	SAMN07715088	Enteritidis	JEGX01.0004	11	4	10151	10151	5/29/17	89	MALE	NHISPANIC	Human	BLOOD	DADE
PNUSAS018339	SAMN07352331	Enteritidis	JEGX01.0005	11	4	10183	78636	4/26/17	77	MALE	NHISPANIC	Human	stool	MANATEE
PNUSAS010391	SAMN06623959	Enteritidis	JEGX01.0004	11	4	10184	46739	2/22/17	71	MALE	NHISPANIC	Human		HILLSBOROUGH
PNUSAS013888	SAMN07143126	Newport	JJPX01.0025	118	2	10253	72738	4/10/17	88	FEMALE	HISPANIC	Human	stool	NA
PNUSAS056330	SAMN10141997	Enteritidis	JEGX01.0005	11	4	10584	10584	6/10/18	41	MALE	NHISPANIC	Human	stool	PASCO
PNUSAS056331	SAMN10142009	Enteritidis	JEGX01.0005	11	4	10584	10584	6/12/18	44	FEMALE	NHISPANIC	Human	stool	PASCO
PNUSAS056326	SAMN10142001	Enteritidis	JEGX01.0005	11	4	10584	10584	6/4/18	5	FEMALE	HISPANIC	Human	stool	HILLSBOROUGH
PNUSAS056327	SAMN10142000	Enteritidis	JEGX01.0005	11	4	10584	10584	6/8/18	56	FEMALE	NHISPANIC	Human	BLOOD	PASCO
PNUSAS056329	SAMN10141998	Enteritidis	JEGX01.0005	11	4	10584	10584	6/8/18	34	MALE	NHISPANIC	Human	stool	PASCO
PNUSAS055173	SAMN10095891	Enteritidis	JEGX01.0005	11	4	10584	10584	6/3/18	32	MALE	NHISPANIC	Human	stool	LEON
PNUSAS055175	SAMN10095889	Enteritidis	JEGX01.0005	11	4	10584	10584	6/6/18	50	MALE	UNKNOWN	Human	stool	PASCO
PNUSAS055176	SAMN10095888	Enteritidis	JEGX01.0030	11	4	10584	10584	6/4/18	28	MALE	NHISPANIC	Human	stool	PASCO
PNUSAS056337	SAMN10142020	Enteritidis	JEGX01.0005	11	4	10584	10584	6/7/18	36	MALE	UNKNOWN	Human	stool	PASCO
PNUSAS055166	SAMN10095865	Enteritidis	JEGX01.0005	11	4	10584	10584	5/25/18	74	FEMALE	NHISPANIC	Human	stool	SANTA ROSA
PNUSAS044522	SAMN09510578	Enteritidis	JEGX01.0005	11	4	10584	10584	5/20/18	75	FEMALE	NHISPANIC	Human	stool	POLK
PNUSAS044516	SAMN09510572	Enteritidis	JEGX01.0005	11	4	10584	10584	5/16/18	6	MALE	NHISPANIC	Human	stool	INDIAN RIVER
PNUSAS017667	SAMN07370937	Enteritidis	JEGX01.0005	11	4	10584	12492	4/17/17	1	MALE	NHISPANIC	Human	stool	BREVARD
PNUSAS015133	SAMN07202696	Enteritidis	JEGX01.0005	11	4	11056	74771	5/3/17	48	MALE	UNKNOWN	Human		DADE
PNUSAS021428	SAMN07571919	Enteritidis	JEGX01.0002	11	4	11057	11057	7/7/17	22	MALE	NHISPANIC	Human	stool	ORANGE
PNUSAS051108	SAMN09933838	Senftenberg	JMPX01.0090	14	55	11206	168263	5/1/18	2	MALE	NHISPANIC	Human	stool	HILLSBOROUGH
PNUSAS051112	SAMN09933855	Senftenberg	JMPX01.0090	14	55	11206	117099	5/3/18	31	MALE	UNKNOWN	Human	stool	ALACHUA
PNUSAS051113	SAMN09933854	Senftenberg	JMPX01.0090	14	55	11206	117099	5/3/18	56	FEMALE	HISPANIC	Human	stool	HILLSBOROUGH
PNUSAS051111	SAMN09933856	Senftenberg	JMPX01.0090	14	55	11206	168148	5/3/18	63	FEMALE	NHISPANIC	Human	stool	ST. LUCIE
PNUSAS051107	SAMN09933840	Senftenberg	JMPX01.0090	14	55	11206	117099	5/14/18	60	MALE	UNKNOWN	Human	stool	BROWARD
PNUSAS051109	SAMN09933857	Senftenberg	JMPX01.0090	14	55	11206	117099	4/27/18	0	MALE	NHISPANIC	Human	stool	HARDEE
PNUSAS012899	SAMN06924429	Enteritidis	JEGX01.0004	11	4	11460	60616	3/22/17	12	FEMALE	NHISPANIC	Human	stool	BROWARD
PNUSAS010168	SAMN06602660	Enteritidis	JEGX01.0004	11	4	11460	60616	2/18/17	46	FEMALE	NHISPANIC	Human	stool	COLLIER
PNUSAS032599	SAMN08434754	Javiana	JGGX01.0094	24	17	11615	60592	11/9/17	4	MALE	NHISPANIC	Human	stool	DUVAL
PNUSAS032591	SAMN08388648	Javiana	JJPX01.0429	24	17	11615	60592	11/7/17	0	FEMALE	NHISPANIC	Human	stool	HERNANDO
PNUSAS033677	SAMN08774325	Javiana	JGGX01.0094	24	17	12146	115501	11/16/17	0	MALE	UNKNOWN	Human	stool	DUVAL
PNUSAS037767	SAMN08815105	Newport	JJPX01.0032	118	2	13124	114783	1/25/18	0	MALE	HISPANIC	Human	stool	ORANGE
PNUSAS018887	SAMN07414515	Newport	JJPX01.0400	118	2	13124	80685	6/8/17	63	MALE	NHISPANIC	Human	stool	ALACHUA
PNUSAS010877	SAMN06647605	Newport	JJPX01.0036	118	2	13124	67710	3/9/17	75	FEMALE	NHISPANIC	Human	stool	TAYLOR
PNUSAS029009	SAMN08105178	Javiana	JGGX01.0013	24	17	14210	100001	11/5/17	1	FEMALE	NHISPANIC	Human	stool	ST. JOHNS
PNUSAS013886	SAMN07143124	Javiana	JGGX01.0012	24	17	14210	71403	4/11/17	0	FEMALE	NHISPANIC	Human	stool	DUVAL
PNUSAS013661	SAMN07138683	Javiana	JGGX01.0488	24	17	14210	71403	4/17/17	0	FEMALE	NHISPANIC	Human	BLOOD	DUVAL
PNUSAS015098	SAMN07202661	Enteritidis	JEGX01.0004	11	4	14238	69844	5/10/17	4	FEMALE	HISPANIC	Human	stool	NA
PNUSAS042183	SAMN09293745	Sandiego	JLXX01.0053	126	12	15048	15048	2/19/18	21	MALE	UNKNOWN	Human	stool	PALM BEACH
PNUSAS051892	SAMN10033038	Typhimurium	JPXX01.0023	19	1	15571	119248	8/1/18	56	FEMALE	NHISPANIC	Human	stool	DUVAL
PNUSAS017044	SAMN07352793	Enteritidis	JEGX01.0953	11	4	16303	78699	5/12/17	0	FEMALE	UNKNOWN	Human	stool	HILLSBOROUGH
PNUSAS027219	SAMN07837976	Typhimurium	JPXX01.0010	19	1	16517	106511	7/8/17	46	FEMALE	NHISPANIC	Human	stool	NA
PNUSAS011462	SAMN06708778	Newport	JJPX01.2123	118	2	16945	68547	2/25/17	0	FEMALE	HISPANIC	Human	stool	POLK
PNUSAS015118	SAMN07202681	Javiana	JGGX01.0023	24	17	18541	18541	5/14/17	29	FEMALE	HISPANIC	Human	stool	HILLSBOROUGH
PNUSAS018349	SAMN07352341	Enteritidis	JEGX01.0049	11	4	19036	78932	5/12/17	12	MALE	NHISPANIC	Human	stool	PALM BEACH
PNUSAS017045	SAMN07352794	IIIb 61:l,v:1,5,7:[z57]		243	10	19825	78704	5/13/17	39	MALE	NHISPANIC	Human	stool	CLAY
PNUSAS036141	SAMN08772918	Enteritidis	JEGX01.0004	11	4	19852	43052	1/7/18	0	MALE	HISPANIC	Human	stool	DADE
PNUSAS016209	SAMN07260220	Enteritidis	JEGX01.0021	11	4	19852	43052	5/27/17	30	MALE	NHISPANIC	Human	stool	DUVAL
PNUSAS013660	SAMN07138682	Enteritidis	JEGX01.0021	11	4	19852	43052	4/17/17	75	MALE	UNKNOWN	Human	BLOOD	MANATEE
PNUSAS017699	SAMN07352382	Enteritidis	JEGX01.0240	11	4	20998	77197	6/16/17	70	FEMALE	NHISPANIC	Human	URINE	PALM BEACH
PNUSAS055787	SAMN10133812	Javiana	JGGX01.0047	24	17	22742	168533	5/29/18	2	FEMALE	NHISPANIC	Human	stool	ORANGE
PNUSAS048221	SAMN09744564	Enteritidis	JEGX01.0031	11	4	26508	169274	5/30/18	9	MALE	UNKNOWN	Human	stool	DADE
PNUSAS027254	SAMN07837987	Enteritidis	JEGX01.0031	11	4	26508	70788	6/12/17	75	MALE	UNKNOWN	Human	stool	DADE
PNUSAS012911	SAMN06924441	Enteritidis	JEGX01.0031	11	4	26508	70788	3/28/17	4	FEMALE	UNKNOWN	Human	stool	DADE
PNUSAS062398	SAMN10501405	Agbeni	JRFX01.0048	2606	292	26649	42091	10/8/18	1	MALE	NHISPANIC	Human	BLOOD	LEE
PNUSAS048843	SAMN09763808	Enteritidis	JEGX01.0401	11	4	27952	167852	4/25/18	69	FEMALE	HISPANIC	Human	stool	DADE
PNUSAS016329	SAMN07269324	Enteritidis	JEGX01.0031	11	4	27952	61328	5/17/17	63	FEMALE	HISPANIC	Human	BLOOD	BROWARD
PNUSAS030946	SAMN08235401	I 4,[5],12:i:-	JPXX01.3335	34	1	29922	105194	10/30/17	83	FEMALE	NHISPANIC	Human	stool	VOLUSIA
PNUSAS018343	SAMN07352335	Paratyphi B var. Java	JKXX01.0014	127	19	32189	68833	4/28/17	50	MALE	NHISPANIC	Human	stool	LEE
PNUSAS026540	SAMN07795642	Paratyphi B var. Java	JKXX01.0014	127	19	32189	68833	6/27/17	6	FEMALE	NHISPANIC	Human	URINE	ORANGE
PNUSAS019574	SAMN07519155	Javiana	JGGX01.0099	24	17	32923	83953	7/5/17	5	MALE	NHISPANIC	Human	stool	ST. JOHNS
PNUSAS016146	SAMN07227136	Javiana	JGGX01.0047	24	17	33094	75729	4/29/17	28	FEMALE	HISPANIC	Human	stool	MARION
PNUSAS027255	SAMN07837988	Enteritidis	JEGX01.1174	11	4	34339	34339	6/12/17	90	FEMALE	NHISPANIC	Human		BROWARD
PNUSAS013891	SAMN07143129	Enteritidis	JEGX01.0031	11	4	36574	72688	4/8/17	72	FEMALE	HISPANIC	Human	stool	DADE
PNUSAS018345	SAMN07352337	Hadar	TDKX01.0049	33	22	39803	40566	4/29/17	0	FEMALE	NHISPANIC	Human	stool	BREVARD
PNUSAS015101	SAMN07202664	Hadar	TDKX01.0049	33	22	39803	40566	5/8/17	1	MALE	NHISPANIC	Human	stool	ALACHUA
PNUSAS013982	SAMN07159299	Hadar	TDKX01.0049	33	22	39803	40566	4/18/17	0	FEMALE	HISPANIC	Human		BROWARD
PNUSAS018357	SAMN07352348	Hadar	TDKX01.0049	33	22	39803	40566	5/23/17	2	MALE	NHISPANIC	Human	stool	LEON
PNUSAS013882	SAMN07143120	Enteritidis	JEGX01.1187	11	4	40641	69527	4/7/17	41	FEMALE	NHISPANIC	Human	stool	NA
PNUSAS013894	SAMN07143132	Enteritidis	JEGX01.0049	11	4	40641	69527	4/20/17	82	FEMALE	NHISPANIC	Human	stool	CITRUS
PNUSAS014740	SAMN07197359	I 4,[5],12:i:-	JPXX01.1193	19	1	40768	40768	4/13/17	1	MALE	NHISPANIC	Human	stool	BROWARD
PNUSAS043538	SAMN09430460	Miami		80	111	41990	41990	3/23/18	1	FEMALE	NHISPANIC	Human	stool	COLUMBIA
PNUSAS010157	SAMN06602649	Agbeni	JRFX01.0003	2009	292	42101	66582	3/2/17	75	MALE	NHISPANIC	Human	stool	VOLUSIA
PNUSAS013296	SAMN06924451	Agbeni	JRFX01.0003	2009	292	42101	66582	3/29/17	32	FEMALE	UNKNOWN	Human	stool	BREVARD
PNUSAS018871	SAMN07361189	Javiana	JGGX01.0012	24	17	42591	79624	6/23/17	1	MALE	NHISPANIC	Human	stool	HIGHLANDS
PNUSAS045297	SAMN09551935	Hartford		405	169	43655	133012	5/15/18	6	MALE	UNKNOWN	Human	stool	DESOTO
PNUSAS017671	SAMN07370939	IIIb 61:l,v:1,5,7:[z57]		243	10	43886	79784	4/18/17	56	MALE	UNKNOWN	Human	stool	CHARLOTTE
PNUSAS011527	SAMN06708769	Braenderup	JBPX01.0667	22	24	47646	47646	1/16/17	51	FEMALE	HISPANIC	Human	stool	HILLSBOROUGH
PNUSAS010166	SAMN06602658	Braenderup	JBPX01.0169	22	24	47646	47646	1/20/17	29	FEMALE	NHISPANIC	Human	stool	ST. JOHNS
PNUSAS053757	SAMN10095853	Newport	JJPX01.0010	132	7	47842	169269	7/18/18	82	MALE	NHISPANIC	Human	stool	PALM BEACH
PNUSAS053754	SAMN10095856	Newport	JJPX01.0010	132	7	47842	47842	6/27/18	74	MALE	NHISPANIC	Human	stool	NA
PNUSAS056325	SAMN10142002	Newport	JJPX01.0010	132	7	47842	47842	6/6/18	30	FEMALE	NHISPANIC	Human	stool	HILLSBOROUGH
PNUSAS010680	SAMN06641741	Saintpaul	JN6X01.0030	95	209	48376	68173	2/27/17	51	MALE	NHISPANIC	Human	stool	CHARLOTTE
PNUSAS021442	SAMN07571926	Enteritidis	JEGX01.0005	11	4	48722	85670	7/16/17	59	FEMALE	NHISPANIC	Human	stool	BREVARD
PNUSAS016927	SAMN07414494	Heidelberg	JPXX01.5257	15	26	48969	81148	5/17/17	17	MALE	HISPANIC	Human	stool	POLK
PNUSAS016157	SAMN07227147	Mbandaka		413	62	49215	49215	4/15/17	72	MALE	NHISPANIC	Human		BROWARD
PNUSAS054384	SAMN10088548	Typhimurium	JPXX01.0416	19	1	49586	169069	6/14/18	4	FEMALE	NHISPANIC	Human	stool	POLK
PNUSAS044525	SAMN09510575	Infantis	JFXX01.0007	32	31	49659	133283	5/21/18	35	FEMALE	NHISPANIC	Human	stool	ORANGE
PNUSAS039194	SAMN08963953	Infantis	JFXX01.0311	32	31	49669	118150	2/14/18	14	FEMALE	HISPANIC	Human	stool	BROWARD
PNUSAS016213	SAMN07260224	Enteritidis	JEGX01.0004	11	4	49735	49735	5/22/17	43	MALE	NHISPANIC	Human		ORANGE
PNUSAS013672	SAMN07138694	Enteritidis	JEGX01.0004	11	4	49735	49735	4/26/17	83	MALE	UNKNOWN	Human	URINE	NA
PNUSAS055172	SAMN10095892	Enteritidis	JEGX01.0004	11	4	50294	168541	6/3/18	21	FEMALE	HISPANIC	Human	stool	HILLSBOROUGH
PNUSAS029681	SAMN08224096	Enteritidis	JEGX01.0021	11	4	50294	103734	9/19/17	6	MALE	NHISPANIC	Human	BLOOD	BROWARD
PNUSAS054382	SAMN10088489	Enteritidis	JEGX01.0004	11	4	50773	169068	6/13/18	36	FEMALE	NHISPANIC	Human	stool
PNUSAS043535	SAMN09430435	Enteritidis	JEGX01.0004	11	4	50773	82906	3/15/18	73	MALE	UNKNOWN	Human	stool	PINELLAS
PNUSAS044935	SAMN09650521	Enteritidis	JEGX01.0004	11	4	50773	82906	3/15/18	49	FEMALE	UNKNOWN	Human	stool	HERNANDO
PNUSAS027044	SAMN07830259	Rubislaw	JLPX01.0059	94	133	50945	95470	10/5/17	4	FEMALE	NHISPANIC	Human	BLOOD	POLK
PNUSAS027263	SAMN07842081	I 4,[5],12:i:-	JPXX01.0621	19	1	51181	181939	6/13/17	3	MALE	NHISPANIC	Human	stool	BROWARD
PNUSAS010393	SAMN06623946	Enteritidis	JEGX01.0004	11	4	51581	67109	1/20/17	35	FEMALE	NHISPANIC	Human	stool	HILLSBOROUGH
PNUSAS014720	SAMN07190290	Enteritidis	JEGX01.0021	11	4	51757	55181	1/5/17	12	MALE	HISPANIC	Human	stool	NA
PNUSAS039995	SAMN09091276	Typhimurium	JPXX01.0275	19	1	53656	109758	2/8/18	51	UNKNOWN	UNKNOWN	Human	stool	NA
PNUSAS018870	SAMN07361188	Muenchen	JJ6X01.2415	83	248	54002	79645	6/25/17	42	FEMALE	UNKNOWN	Human	stool	POLK
PNUSAS028989	SAMN08105158	Apapa		647	181	54384	54384	11/3/17	1	FEMALE	NHISPANIC	Human	BLOOD	ORANGE
PNUSAS008072	SAMN06283467	Braenderup	JBPX01.0592	22	24	55907	56031	1/11/17	11	MALE	HISPANIC	Human	stool	DADE
PNUSAS011962	SAMN06845821	Enteritidis	JEGX01.0004	11	4	57111	57111	3/28/17	46	FEMALE	NHISPANIC	Human	stool	DUVAL
PNUSAS016147	SAMN07227137	Typhimurium	JPXX01.0351	19	1	57152	57152	5/2/17	0	FEMALE	NHISPANIC	Human	stool	NA
PNUSAS010395	SAMN06623948	Enteritidis	JEGX01.0004	11	4	57405	63148	2/13/17	46	MALE	NHISPANIC	Human	stool	NA
PNUSAS030994	SAMN08292396	Agona	JABX01.0855	13	54	58102	58102	10/25/17	28	MALE	NHISPANIC	Human		LAKE
PNUSAS055792	SAMN10133833	Javiana	JGGX01.0464	24	17	58639	168532	5/31/18	0	MALE	NHISPANIC	Human	stool	SANTA ROSA
PNUSAS009473	SAMN06462389	Enteritidis	JEGX01.1057	11	4	58778	64138	1/19/17	31	FEMALE	UNKNOWN	Human	stool	NA
PNUSAS008645	SAMN06324275	Enteritidis	JEGX01.1057	11	4	58778	64138	1/19/17	4	MALE	HISPANIC	Human	stool	BROWARD
PNUSAS009472	SAMN06462388	Enteritidis	JEGX01.1057	11	4	58778	64138	1/20/17	1	FEMALE	HISPANIC	Human	stool	DADE
PNUSAS009475	SAMN06462391	Enteritidis	JEGX01.1057	11	4	58778	64138	1/20/17	50	MALE	HISPANIC	Human	stool
PNUSAS054377	SAMN10079095	Bareilly	JAPX01.0064	2553	382	59624	169029	6/6/18	40	MALE	NHISPANIC	Human	stool	PINELLAS
PNUSAS031694	SAMN08292371	Bareilly	JAPX01.0064	2553	382	59624	59624	11/3/17	20	FEMALE	NHISPANIC	Human	stool	PINELLAS
PNUSAS028552	SAMN08040140	Bareilly	JAPX01.0064	2553	382	59624	59624	10/25/17	41	MALE	NHISPANIC	Human	stool	PINELLAS
PNUSAS031706	SAMN08292383	Bareilly	JAPX01.0064	2553	382	59624	59624	11/3/17	47	MALE	UNKNOWN	Human	stool	ALACHUA
PNUSAS031702	SAMN08292379	Bareilly	JAPX01.0064	2553	382	59624	59624	11/3/17	46	MALE	UNKNOWN	Human	stool	DUVAL
PNUSAS031703	SAMN08292380	Bareilly	JAPX01.0064	2553	382	59624	59624	11/3/17	36	FEMALE	NHISPANIC	Human	stool	HILLSBOROUGH
PNUSAS044528	SAMN09510604	Bareilly	JAPX01.0064	2553	382	59624	59624	5/16/18	34	FEMALE	NHISPANIC	Human	stool	HILLSBOROUGH
PNUSAS043553	SAMN09430464	Bareilly	JAPX01.0064	2553	382	59624	59624	3/28/18	71	FEMALE	UNKNOWN	Human
PNUSAS027602	SAMN08007395	Bareilly	JAPX01.0064	2553	382	59624	59624	10/7/17	18	FEMALE	NHISPANIC	Human	stool	PINELLAS
PNUSAS027064	SAMN07830257	Bareilly	JAPX01.0064	2553	382	59624	59624	10/6/17	10	MALE	NHISPANIC	Human	stool	PINELLAS
PNUSAS028554	SAMN08040142	Bareilly	JAPX01.0064	2553	382	59624	59624	10/25/17	42	MALE	UNKNOWN	Human	stool
PNUSAS038711	SAMN08955958	Bareilly	JAPX01.0064	2553	382	59624	59624	9/25/17	60	FEMALE	NHISPANIC	Human	stool	HILLSBOROUGH
PNUSAS021429	SAMN07568808	Bareilly	JAPX01.0064	2553	382	59624	59624	7/14/17	28	FEMALE	NHISPANIC	Human	stool
PNUSAS018358	SAMN07352349	Bareilly	JAPX01.0064	2553	382	59624	59624	5/24/17	60	FEMALE	UNKNOWN	Human	stool
PNUSAS020189	SAMN07436252	Bareilly	JAPX01.0064	2553	382	59624	59624	7/4/17	57	MALE	NHISPANIC	Human	stool	PINELLAS
PNUSAS017054	SAMN07352803	Bareilly	JAPX01.0064	2553	382	59624	59624	5/8/17	1	MALE	HISPANIC	Human	stool	SARASOTA
PNUSAS017028	SAMN07342222	Bareilly	JAPX01.0064	2553	382	59624	59624	6/6/17	30	FEMALE	NHISPANIC	Human	stool	PINELLAS
PNUSAS016951	SAMN07342216	Bareilly	JAPX01.0064	2553	382	59624	59624	5/2/17	49	FEMALE	UNKNOWN	Human	stool	NA
PNUSAS010613	SAMN06624649	Bareilly	JAPX01.0064	2553	382	59624	59624	2/7/17	58	FEMALE	NHISPANIC	Human	stool	BREVARD
PNUSAS011529	SAMN06708756	Bareilly		2553	382	59624	59624	2/27/17	83	FEMALE	NHISPANIC	Human	stool	PINELLAS
PNUSAS011460	SAMN06708780	Bareilly	JAPX01.0064	2553	382	59624	59624	2/23/17	25	FEMALE	UNKNOWN	Human	stool	HILLSBOROUGH
PNUSAS014728	SAMN07180381	Bareilly	JAPX01.0064	2553	382	59624	59624	5/11/17	34	FEMALE	NHISPANIC	Human	stool	PINELLAS
PNUSAS015060	SAMN07180380	Bareilly	JAPX01.0064	2553	382	59624	59624	5/4/17	31	FEMALE	NHISPANIC	Human	stool
PNUSAS014963	SAMN07180379	Bareilly	JAPX01.0064	2553	382	59624	59624	4/27/17	52	FEMALE	NHISPANIC	Human	stool	CITRUS
PNUSAS016145	SAMN07227135	Bareilly	JAPX01.0216	2553	382	59624	59624	4/26/17	28	FEMALE	NHISPANIC	Human	stool
PNUSAS016458	SAMN07342190	Bareilly	JAPX01.0064	2553	382	59624	59624	5/11/17	37	FEMALE	UNKNOWN	Human	stool
PNUSAS025146	SAMN07736069	Bareilly	JAPX01.0064	2553	382	59624	59624	7/7/17	4	FEMALE	HISPANIC	Human	stool	HILLSBOROUGH
PNUSAS027047	SAMN07830240	Bareilly	JAPX01.0064	2553	382	59624	59624	9/30/17	22	FEMALE	NHISPANIC	Human	URINE	PINELLAS
PNUSAS028558	SAMN08040146	Bareilly	JAPX01.0064	2553	382	59624	59624	10/3/17	45	FEMALE	NHISPANIC	Human	stool
PNUSAS035540	SAMN08774340	Bareilly	JAPX01.0064	2553	382	59624	59624	11/27/17	57	FEMALE	NHISPANIC	Human	stool	PINELLAS
PNUSAS037758	SAMN08815091	Bareilly	JAPX01.0064	2553	382	59624	59624	12/10/17	43	MALE	NHISPANIC	Human		HILLSBOROUGH
PNUSAS016332	SAMN07269327	Bareilly	JAPX01.0064	2553	382	59624	59624	5/18/17	14	FEMALE	NHISPANIC	Human	stool
PNUSAS043549	SAMN09430448	Bareilly	JAPX01.0064	2553	382	59624	59624	3/29/18	13	FEMALE	NHISPANIC	Human	stool	ST. LUCIE
PNUSAS043548	SAMN09430449	Bareilly	JAPX01.0064	2553	382	59624	59624	3/29/18	37	FEMALE	NHISPANIC	Human	stool
PNUSAS045298	SAMN09545754	Bareilly	JAPX01.0064	2553	382	59624	59624	5/15/18	75	MALE	NHISPANIC	Human	stool	PINELLAS
PNUSAS036140	SAMN08772919	Poona		447	46	59667	111559	1/8/18	1	MALE	HISPANIC	Human	stool	BROWARD
PNUSAS044926	SAMN09650494	Enteritidis	JEGX01.0004	11	4	60101	60101	3/27/18	25	FEMALE	UNKNOWN	Human	stool	ORANGE
PNUSAS036520	SAMN08815100	Reading	JLGX01.0098	412	12	60573	60573	11/28/17	44	FEMALE	NHISPANIC	Human	stool	BROWARD
PNUSAS013975	SAMN07159313	Typhimurium	JPXX01.0038	19	1	60633	60633	3/14/17	14	FEMALE	NHISPANIC	Human	stool	OSCEOLA
PNUSAS029008	SAMN08105177	Javiana	JGGX01.0065	24	17	60793	99982	10/30/17	0	MALE	NHISPANIC	Human	stool	OKALOOSA
PNUSAS010868	SAMN06647600	Poona		964	315	62391	62391	2/2/17	97	FEMALE	NHISPANIC	Human		PALM BEACH
PNUSAS030385	SAMN08294546	Oranienburg		23	41	62487	105219	10/30/17	1	MALE	NHISPANIC	Human	stool	HILLSBOROUGH
PNUSAS048226	SAMN09744727	Enteritidis	JEGX01.0021	11	4	62607	169280	5/29/18	3	MALE	UNKNOWN	Human	stool	NA
PNUSAS055784	SAMN10133815	Enteritidis	JEGX01.0021	11	4	62607	62697	5/30/18	39	MALE	NHISPANIC	Human	stool	ORANGE
PNUSAS014737	SAMN07197356	Enteritidis	JEGX01.0021	11	4	62607	62697	4/26/17	10	MALE	NHISPANIC	Human	stool	DUVAL
PNUSAS010649	SAMN06641756	Sandiego		126	12	62617	62617	2/10/17	0	MALE	NHISPANIC	Human	stool	BROWARD
PNUSAS008070	SAMN06283465	Sandiego	JLXX01	126	12	62617	62617	1/16/17	0	MALE	NHISPANIC	Human	stool	BROWARD
PNUSAS018865	SAMN07361184	I 1,4,[5],12:b:-	JKXX01.0017	1838	155	62632	79640	6/19/17	25	MALE	HISPANIC	Human	BLOOD	BROWARD
PNUSAS008074	SAMN06283469	Litchfield	JGXX01.0181	3768	61	62633	62633	1/14/17	24	FEMALE	NHISPANIC	Human	stool	DADE
PNUSAS008073	SAMN06283468	Rubislaw		1575	204	62646	62646	1/13/17	0	FEMALE	NHISPANIC	Human	stool	DADE
PNUSAS008075	SAMN06283470	Kentucky	JGPX01.0057	198	56	62647	62647	1/12/17	33	MALE	NHISPANIC	Human	stool	BROWARD
PNUSAS008069	SAMN06283464	Muenchen		112	8	62731	62731	1/13/17	1	FEMALE	HISPANIC	Human	stool	PALM BEACH
PNUSAS008240	SAMN06290890	Braenderup	JBPX01.0161	22	24	63385	63385	1/19/17	77	FEMALE	NHISPANIC	Human	URINE	MANATEE
PNUSAS010874	SAMN06647592	Newport	JJPX01.3716	46	3	63415	181954	1/26/17	0	FEMALE	HISPANIC	Human	stool	DADE
PNUSAS010873	SAMN06647591	Newport		46	3	63415	181937	1/20/17	2	MALE	HISPANIC	Human	stool	DADE
PNUSAS051001	SAMN09848088	Newport	JLXX01.0483	46	3	63415	169288	6/23/18	2	FEMALE	HISPANIC	Human	stool	DADE
PNUSAS047830	SAMN09739419	Newport	JJPX01.3716	46	3	63415	169277	5/20/18	10	FEMALE	HISPANIC	Human	stool	DADE
PNUSAS048213	SAMN09763900	Newport	JJPX01.3716	46	3	63415	169271	5/25/18	61	MALE	HISPANIC	Human	stool	DADE
PNUSAS049967	SAMN09791526	Newport	JJPX01.3716	46	3	63415	169077	5/24/18	16	MALE	HISPANIC	Human	stool	DADE
PNUSAS053261	SAMN09989941	Newport	JJPX01.3716	46	3	63415	168269	6/12/18	0	MALE	NHISPANIC	Human	stool	DADE
PNUSAS049952	SAMN09791511	Newport	JJPX01.3716	46	3	63415	168267	4/22/18	0	MALE	NHISPANIC	Human	stool	DADE
PNUSAS048229	SAMN09744725	Newport	JJPX01.3716	46	3	63415	168071	6/11/18	78	MALE	HISPANIC	Human	BLOOD	DADE
PNUSAS048838	SAMN09761636	Newport	JJPX01.3716	46	3	63415	68425	4/17/18	55	FEMALE	HISPANIC	Human	stool	DADE
PNUSAS053373	SAMN09989965	Newport	JJPX01.3716	46	3	63415	166977	6/15/18	20	FEMALE	HISPANIC	Human	stool	DADE
PNUSAS042195	SAMN09374791	Newport	JJPX01.3716	46	3	63415	63415	4/5/18	0	MALE	HISPANIC	Human	stool	BROWARD
PNUSAS040594	SAMN09206705	Newport	JJPX01.3716	46	3	63415	68425	4/4/18	51	FEMALE	HISPANIC	Human	stool	DADE
PNUSAS040584	SAMN09206713	Newport	JJPX01.3716	46	3	63415	120734	3/26/18	54	MALE	UNKNOWN	Human	stool	NA
PNUSAS039999	SAMN09206660	Newport	JJPX01.3716	46	3	63415	120701	3/2/18	3	FEMALE	NHISPANIC	Human	stool	BROWARD
PNUSAS038673	SAMN08930242	Newport	JJPX01.3716	46	3	63415	68425	1/24/18	4	MALE	UNKNOWN	Human	stool	DADE
PNUSAS038674	SAMN08930241	Newport	JJPX01.3716	46	3	63415	68425	1/25/18	69	MALE	UNKNOWN	Human	stool	DADE
PNUSAS038663	SAMN08930246	Newport	JEGX01.0005	46	3	63415	116944	2/3/18	1	MALE	HISPANIC	Human	stool	DADE
PNUSAS035570	SAMN08815088	Newport	JGXX01.0006	46	3	63415	63415	1/1/18	79	MALE	HISPANIC	Human	stool	DADE
PNUSAS036145	SAMN08772933	Newport	JJPX01.3716	46	3	63415	111547	1/8/18	50	FEMALE	NHISPANIC	Human	stool	BROWARD
PNUSAS036136	SAMN08824568	Newport	JJPX01.3716	46	3	63415	111547	12/29/17	56	MALE	NHISPANIC	Human	stool	BROWARD
PNUSAS032585	SAMN08388655	Newport	JAAX01	46	3	63415	109545	11/9/17	2	MALE	NHISPANIC	Human	stool	ORANGE
PNUSAS030153	SAMN08211517	Newport	JJPX01.3716	46	3	63415	63415	11/2/17	0	FEMALE	NHISPANIC	Human	stool	DADE
PNUSAS030365	SAMN08214004	Newport	JJPX01.3716	46	3	63415	63415	9/21/17	0	MALE	HISPANIC	Human	BLOOD	DADE
PNUSAS030022	SAMN08166024	Newport	JJPX01.3716	46	3	63415	102355	9/20/17	11	MALE	NHISPANIC	Human	BLOOD	BROWARD
PNUSAS027251	SAMN07837984	Newport		46	3	63415	95585	6/8/17	0	FEMALE	NHISPANIC	Human	stool	BROWARD
PNUSAS021421	SAMN07571918	Newport	JJPX01.3716	46	3	63415	68425	6/30/17	1	MALE	NHISPANIC	Human	stool	BROWARD
PNUSAS018316	SAMN07414495	Newport	JJPX01.3716	46	3	63415	80757	5/19/17	1	FEMALE	NHISPANIC	Human	stool	DADE
PNUSAS018321	SAMN07414500	Newport	JJPX01.3716	46	3	63415	80752	5/25/17	0	FEMALE	HISPANIC	Human	stool	DADE
PNUSAS018329	SAMN07414506	Newport	JJPX01.3716	46	3	63415	63415	6/5/17	82	FEMALE	HISPANIC	Human	stool	BROWARD
PNUSAS016952	SAMN07342205	Newport	JJPX01.3716	46	3	63415	78221	6/2/17	46	MALE	NHISPANIC	Human	URINE	BROWARD
PNUSAS015131	SAMN07202694	Newport	JJPX01.3716	46	3	63415	74816	5/1/17	1	MALE	HISPANIC	Human		DADE
PNUSAS015129	SAMN07202692	Newport	JJPX01.3716	46	3	63415	74763	4/26/17	0	MALE	HISPANIC	Human		DADE
PNUSAS012908	SAMN06924438	Newport	JJPX01.3716	46	3	63415	68425	3/27/17	1	MALE	UNKNOWN	Human	stool	DADE
PNUSAS010657	SAMN06641764	Newport		46	3	63415	68425	1/31/17	4	FEMALE	HISPANIC	Human	stool	DADE
PNUSAS010870	SAMN06647602	Newport	JJPX01.5786	46	3	63415	67854	2/3/17	0	MALE	HISPANIC	Human		DADE
PNUSAS008239	SAMN06290889	Mississippi	JIPX01.0013	448	80	63532	63532	1/26/17	6	FEMALE	NHISPANIC	Human	stool	DUVAL
PNUSAS045282	SAMN09537492	IV 48:g,z51:-		433	23	63878	132808	5/2/18	66	MALE	NHISPANIC	Human	BLOOD	NA
PNUSAS012892	SAMN06924422	Muenchen	JJ6X01.4482	3795	8	64108	64108	3/14/17	0	MALE	HISPANIC	Human	stool	DADE
PNUSAS008647	SAMN06324277	Muenchen	JJ6X01.4482	3795	8	64108	64108	1/17/17	0	MALE	HISPANIC	Human	stool	DADE
PNUSAS008648	SAMN06324278	Enteritidis	JEGX01.0030	11	4	64117	64117	1/19/17	27	FEMALE	NHISPANIC	Human	stool	DADE
PNUSAS012898	SAMN06924428	Typhimurium	JPXX01.0262	19	1	64118	64118	3/21/17	7	FEMALE	HISPANIC	Human	stool	BROWARD
PNUSAS008237	SAMN06290895	Poona		447	46	64135	64135	1/9/17	0	MALE	NHISPANIC	Human	stool	BROWARD
PNUSAS008416	SAMN06308220	Rubislaw		1575	204	64139	64139	1/29/17	0	FEMALE	NHISPANIC	Human	stool	DUVAL
PNUSAS008642	SAMN06324272	Bareilly		2553	382	64147	64147	1/24/17	19	MALE	NHISPANIC	Human	stool	BROWARD
PNUSAS008415	SAMN06308219	Senftenberg		210	69	64153	64153	1/26/17	59	MALE	NHISPANIC	Human	stool	BROWARD
PNUSAS008646	SAMN06324276	IV 50:z4,z23:-		2053	301	64160	64160	1/23/17	0	MALE	NHISPANIC	Human	stool	NA
PNUSAS008414	SAMN06308218	Y:l,v:1,5,7	JAAX01	233	10	64166	64166	1/23/17	86	FEMALE	NHISPANIC	Human	URINE	LEE
PNUSAS008643	SAMN06324273	Ohio		329	72	64168	64168	1/19/17	1	MALE	NHISPANIC	Human	stool	DADE
PNUSAS008644	SAMN06324274	Muenchen	JJ6X01.3851	1567	8	64171	64171	1/19/17	67	MALE	NHISPANIC	Human	stool	PALM BEACH
PNUSAS014755	SAMN07197371	Mbandaka	TDRX01.0333	413	62	64514	64514	3/19/17	71	FEMALE	NHISPANIC	Human	stool	SARASOTA
PNUSAS035561	SAMN08774351	Javiana	JGGX01.0888	24	17	64577	113943	11/28/17	59	FEMALE	NHISPANIC	Human	stool	NA
PNUSAS008649	SAMN06371310	Javiana	JGGX01.0154	24	17	64743	64743	1/19/17	9	MALE	HISPANIC	Human	stool	DADE
PNUSAS008417	SAMN06308221	Miami		80	111	65345	65345	1/27/17	65	MALE	NHISPANIC	Human		ALACHUA
PNUSAS017036	SAMN07342230	Baildon	TDEX01.0002	2166	399	65754	78620	5/1/17	76	MALE	UNKNOWN	Human	stool	COLLIER
PNUSAS044524	SAMN09510576	Schwarzengrund	JM6X01.0367	96	33	65916	102989	5/21/18	5	FEMALE	HISPANIC	Human	stool	POLK
PNUSAS009481	SAMN06547376	Weltevreden		365	205	66139	66139	2/15/17	0	MALE	HISPANIC	Human	stool	DADE
PNUSAS009479	SAMN06547374	Reading		93	43	66142	66142	2/10/17	0	MALE	NHISPANIC	Human	stool	PALM BEACH
PNUSAS009478	SAMN06547373	Poona	JL6X01.0136	447	46	66154	66154	2/4/17	89	FEMALE	HISPANIC	Human	stool	DADE
PNUSAS009483	SAMN06547377	IV 48:z4,z32:-		2058	23	66167	66167	2/6/17	3	MALE	HISPANIC	Human	BLOOD	DADE
PNUSAS009480	SAMN06547375	Urbana		754	38	66171	66171	2/15/17	1	FEMALE	NHISPANIC	Human	stool	DADE
PNUSAS009477	SAMN06547372	Sandiego	JLXX01.0331	126	12	66239	66239	2/19/17	6	MALE	NHISPANIC	Human	URINE	ST. JOHNS
PNUSAS011963	SAMN06845822	Enteritidis	JEGX01.0002	11	4	66377	66377	3/28/17	66	MALE	UNKNOWN	Human	stool	NA
PNUSAS013901	SAMN07143139	Enteritidis	JEGX01.0021	11	4	66379	72676	4/12/17	22	MALE	NHISPANIC	Human	BLOOD	ORANGE
PNUSAS009484	SAMN06547378	I 4,[5],12:i:-	JPXX01.1314	34	1	66396	66396	2/15/17	70	FEMALE	NHISPANIC	Human	stool
PNUSAS010091	SAMN06564761	IV 48:g,z51:-		433	23	66408	66408	2/21/17	0	MALE	NHISPANIC	Human	BLOOD	BROWARD
PNUSAS010165	SAMN06602657	Sandiego		126	12	66421	66421	1/21/17	1	FEMALE	NHISPANIC	Human	stool	ORANGE
PNUSAS010162	SAMN06602654	Miami		80	111	66422	66422	1/18/17	74	FEMALE	HISPANIC	Human	stool	ORANGE
PNUSAS010089	SAMN06564759	Saintpaul	JN6X01.0143	95	209	66432	66432	2/21/17	68	MALE	NHISPANIC	Human	stool	NA
PNUSAS010088	SAMN06564758	Saintpaul	JN6X01.0143	95	209	66432	66432	2/22/17	34	FEMALE	NHISPANIC	Human	stool	MARION
PNUSAS010164	SAMN06602656	Thompson	JP6X01.0045	26	28	66444	66444	1/19/17	84	MALE	NHISPANIC	Human	stool
PNUSAS010087	SAMN06564757	Anatum	JAGX01.0467	64	65	66445	66445	2/14/17	79	MALE	NHISPANIC	Human	URINE	ALACHUA
PNUSAS011946	SAMN06756754	IV 50:z4,z23:-		2053	301	66451	66451	1/23/17	72	MALE	NHISPANIC	Human	URINE	NA
PNUSAS010167	SAMN06602659	IV 50:z4,z23:-		2053	301	66451	66451	1/23/17	72	MALE	NHISPANIC	Human	stool	NA
PNUSAS014739	SAMN07197358	Mbandaka	TDRX01.0068	413	62	66467	66467	4/19/17	15	MALE	NHISPANIC	Human	stool	DUVAL
PNUSAS013668	SAMN07138690	Mbandaka	TDRX01.0068	413	62	66467	71387	4/19/17	81	FEMALE	NHISPANIC	Human	URINE	DUVAL
PNUSAS010090	SAMN06564760	Mbandaka	TDRX01.0068	413	62	66467	66467	2/22/17	69	FEMALE	NHISPANIC	Human	stool	CLAY
PNUSAS010163	SAMN06602655	Typhimurium		19	1	66470	66470	1/18/17	2	MALE	NHISPANIC	Human	stool	ORANGE
PNUSAS009476	SAMN06547371	Bere		2023	287	66482	66482	2/16/17	23	FEMALE	NHISPANIC	Human	stool	NA
PNUSAS022993	SAMN07611389	Enteritidis	JEGX01.0004	11	4	66530	86809	4/25/17	19	MALE	UNKNOWN	Human	stool	LEE
PNUSAS010161	SAMN06602653	Saintpaul	JN6X01.0044	95	209	66536	66536	3/4/17	55	FEMALE	NHISPANIC	Human	stool	LEON
PNUSAS010158	SAMN06602650	IIIb 48:z52:z		2631	10.1	66540	66540	2/9/17	80	MALE	NHISPANIC	Human		COLLIER
PNUSAS010160	SAMN06602652	Javiana		24	17	66577	66577	3/5/17	7	MALE	NHISPANIC	Human	stool	DUVAL
PNUSAS010159	SAMN06602651	Newport	JJPX01.0384	118	2	66579	66579	2/27/17	79	FEMALE	NHISPANIC	Human	stool	VOLUSIA
PNUSAS009987	SAMN06564523	Rubislaw	JLPX01.0059	94	133	66850	66850	2/13/17	19	MALE	NHISPANIC	Human	BLOOD	DADE
PNUSAS028986	SAMN08105155	Typhimurium	JPXX01.0324	19	1	66876	99975	11/2/17	3	FEMALE	NHISPANIC	Human	stool	OKALOOSA
PNUSAS009985	SAMN06564521	IV 48:g,z51:-		1869	23	66879	66879	2/22/17	75	FEMALE	NHISPANIC	Human	stool	PALM BEACH
PNUSAS009980	SAMN06564517	Manhattan		18	27	66880	66880	2/23/17	70	FEMALE	UNKNOWN	Human	stool	TAYLOR
PNUSAS009981	SAMN06564518	Reading		93	43	66881	66881	2/21/17	74	MALE	NHISPANIC	Human	BLOOD	MARTIN
PNUSAS009975	SAMN06564514	IV 48:g,z51:-		433	23	66885	66885	2/15/17	0	FEMALE	NHISPANIC	Human	stool	MONROE
PNUSAS009974	SAMN06564513	IV 50:z4,z23:-		2053	301	66896	66896	2/13/17	1	MALE	NHISPANIC	Human	stool	BROWARD
PNUSAS012578	SAMN06847180	Baildon	TDEX01.0012	2166	399	66985	69989	4/5/17	73	MALE	NHISPANIC	Human	stool	DADE
PNUSAS010392	SAMN06623960	IV 40:z4,z24:-		2868	419	66990	66990	2/22/17	0	MALE	HISPANIC	Human	stool	ORANGE
PNUSAS010398	SAMN06623951	Paratyphi B var. Java	JKXX01.0014	127	19	66993	66993	2/14/17	1	FEMALE	NHISPANIC	Human	stool	BREVARD
PNUSAS010612	SAMN06624648	IV 50:z4,z23:-		2053	301	66994	66994	2/9/17	1	MALE	NHISPANIC	Human	stool	HARDEE
PNUSAS010608	SAMN06624644	Paratyphi B var. Java		127	19	66996	66996	2/5/17	50	FEMALE	NHISPANIC	Human	stool	ST. LUCIE
PNUSAS010603	SAMN06624639	Poona		308	46	66999	66999	2/1/17	0	MALE	NHISPANIC	Human	stool	HERNANDO
PNUSAS010397	SAMN06623950	Muenchen		112	8	67002	67002	2/13/17	1	MALE	HISPANIC	Human	stool	DADE
PNUSAS010607	SAMN06624643	Hartford		405	169	67006	67006	2/4/17	0	MALE	NHISPANIC	Human	stool	POLK
PNUSAS010389	SAMN06623957	Oranienburg	JJXX01.0001	23	41	67008	67008	2/24/17	3	MALE	NHISPANIC	Human	stool	POLK
PNUSAS009982	SAMN06624635	O61:k:1,5,7	JR9X01.0005	432	10	67025	67025	2/16/17	65	MALE	NHISPANIC	Human	URINE	PALM BEACH
PNUSAS010600	SAMN06624636	Newport	JJPX01.1153	118	2	67027	67027	1/27/17	4	MALE	UNKNOWN	Human	stool	ORANGE
PNUSAS010604	SAMN06624640	Bareilly	JAPX01.0064	2553	382	67028	67028	2/2/17	3	MALE	NHISPANIC	Human	stool	PASCO
PNUSAS009928	SAMN06624651	Anatum	JAGX01.0013	64	65	67030	67030	2/9/17	0	FEMALE	HISPANIC	Human	stool	PINELLAS
PNUSAS010609	SAMN06624645	Rubislaw	JLPX01.0059	94	133	67031	67031	2/8/17	1	FEMALE	NHISPANIC	Human	stool	PASCO
PNUSAS011230	SAMN06677818	IV 50:z4,z23:-		2053	301	67033	68300	3/19/17	0	MALE	NHISPANIC	Human		BROWARD
PNUSAS009976	SAMN06624634	IV 50:z4,z23:-		2053	301	67033	67033	2/15/17	0	MALE	NHISPANIC	Human	stool	BROWARD
PNUSAS010614	SAMN06624650	Javiana	JGGX01.0012	24	17	67036	67036	2/9/17	2	FEMALE	NHISPANIC	Human	stool	HILLSBOROUGH
PNUSAS010605	SAMN06624641	Montevideo		81	40	67042	67042	2/4/17	63	FEMALE	UNKNOWN	Human	stool	HILLSBOROUGH
PNUSAS010394	SAMN06623947	I 1,4,[5],12:b:-		1838	155	67057	67057	1/24/17	9	FEMALE	UNKNOWN	Human	stool	SARASOTA
PNUSAS010396	SAMN06623949	Tallahassee		735	328.2	67066	67066	2/13/17	1	FEMALE	NHISPANIC	Human	stool	DUVAL
PNUSAS018347	SAMN07352339	Bareilly	JAPX01.0064	2553	382	67069	78691	5/10/17	72	FEMALE	NHISPANIC	Human	stool	LEE
PNUSAS018348	SAMN07352340	Bareilly	JAPX01.0064	2553	382	67069	78691	5/10/17	87	MALE	UNKNOWN	Human	stool	PASCO
PNUSAS010610	SAMN06624646	Bareilly	JAPX01.0064	2553	382	67069	67069	2/10/17	18	MALE	NHISPANIC	Human	stool	LEE
PNUSAS010402	SAMN06623955	Anatum	JAGX01.0001	64	65	67070	67070	2/14/17	69	MALE	NHISPANIC	Human	stool	LEE
PNUSAS010401	SAMN06623954	Anatum	JAGX01.0001	64	65	67070	67070	2/15/17	29	MALE	UNKNOWN	Human	stool	OSCEOLA
PNUSAS010399	SAMN06623952	Hartford		405	169	67073	67073	2/14/17	38	MALE	NHISPANIC	Human	stool	LEON
PNUSAS010403	SAMN06623956	Bovismorbificans		150	289	67108	67108	2/20/17	10	MALE	NHISPANIC	Human	stool	OSCEOLA
PNUSAS011070	SAMN06662222	Bovismorbificans		150	289	67108	67108	1/26/17	0	FEMALE	NHISPANIC	Human	stool	DUVAL
PNUSAS010611	SAMN06624647	IV 50:z4,z23:-		2053	301	67118	67118	2/6/17	52	MALE	NHISPANIC	Human	stool	HILLSBOROUGH
PNUSAS010606	SAMN06624642	Bareilly	JAPX01.0064	2553	382	67123	67123	2/5/17	1	FEMALE	HISPANIC	Human	stool	ST. LUCIE
PNUSAS010681	SAMN06641742	Braenderup	JBPX01.0104	22	24	67205	67205	3/3/17	2	FEMALE	HISPANIC	Human	stool	POLK
PNUSAS011537	SAMN06708764	Braenderup	JBPX01.0104	22	24	67205	67205	3/4/17	2	FEMALE	HISPANIC	Human	stool	POLK
PNUSAS010679	SAMN06641740	Newport	JJPX01.2642	118	2	67213	67213	2/28/17	54	FEMALE	NHISPANIC	Human	stool	TAYLOR
PNUSAS010676	SAMN06647597	Javiana	JGGX01.2412	24	17	67285	67285	2/10/17	17	FEMALE	NHISPANIC	Human	stool	COLUMBIA
PNUSAS010866	SAMN06647598	Gaminara		2152	245	67320	67320	1/31/17	0	FEMALE	HISPANIC	Human	stool	COLLIER
PNUSAS011069	SAMN06662221	Muenchen		112	8	67346	67346	1/24/17	1	MALE	NHISPANIC	Human	stool	OSCEOLA
PNUSAS011068	SAMN06662220	Muenchen		112	8	67346	67346	1/25/17	4	MALE	NHISPANIC	Human	stool	OSCEOLA
PNUSAS011067	SAMN06662219	Muenchen	JPXX01.2583	112	8	67346	67346	1/25/17	1	FEMALE	NHISPANIC	Human	stool	HILLSBOROUGH
PNUSAS011066	SAMN06662218	Muenchen		112	8	67346	67346	1/25/17	2	FEMALE	NHISPANIC	Human	stool	HILLSBOROUGH
PNUSAS011064	SAMN06662216	Anatum	JAGX01.0232	64	65	67351	67351	1/30/17	51	MALE	NHISPANIC	Human	stool	PASCO
PNUSAS010878	SAMN06647606	Javiana	JGGX01.0023	24	17	67352	67352	3/12/17	66	FEMALE	NHISPANIC	Human	stool	NA
PNUSAS025898	SAMN07767762	Agona	JABX01.0050	13	54	67370	92418	5/20/17	9	FEMALE	UNKNOWN	Human	stool	DADE
PNUSAS010654	SAMN06641761	Agona	JABX01.0050	13	54	67370	67370	2/10/17	2	FEMALE	HISPANIC	Human	stool	DADE
PNUSAS016319	SAMN07342218	IV 48:g,z51:-		1869	23	67449	80705	5/20/17	1	FEMALE	NHISPANIC	Human	stool	PALM BEACH
PNUSAS024606	SAMN07715091	IV 48:g,z51:-		1869	23	67449	91653	6/28/17	68	MALE	NHISPANIC	Human	stool	PALM BEACH
PNUSAS035564	SAMN08774348	IV 48:g,z51:-		1869	23	67449	113454	11/28/17	69	MALE	UNKNOWN	Human	stool	PALM BEACH
PNUSAS011242	SAMN06677815	Senftenberg	JMPX01.0028	14	55	67524	67524	2/24/17	67	FEMALE	NHISPANIC	Human	stool
PNUSAS017644	SAMN07370925	Mbandaka	TDRX01.0011	413	62	67680	67680	4/6/17	21	FEMALE	NHISPANIC	Human	stool	DUVAL
PNUSAS017656	SAMN07436210	Mbandaka	TDRX01.0011	413	62	67680	67680	4/12/17	37	MALE	HISPANIC	Human	stool	ST. JOHNS
PNUSAS011952	SAMN06756762	Mbandaka	TDRX01.0011	413	62	67680	67680	3/22/17	0	MALE	NHISPANIC	Human	stool	ST. JOHNS
PNUSAS011071	SAMN06662223	Paratyphi B var. Java	JEGX01.0031	88	19	67681	67681	1/25/17	32	FEMALE	NHISPANIC	Human	stool	BREVARD
PNUSAS011072	SAMN06662224	Paratyphi B var. Java	JKXX01.0025	88	19	67681	67681	1/25/17	3	MALE	NHISPANIC	Human	stool	HILLSBOROUGH
PNUSAS011074	SAMN06662226	Rubislaw	JLPX01.0059	94	133	67684	67684	1/26/17	1	MALE	UNKNOWN	Human	stool	BREVARD
PNUSAS011073	SAMN06662225	Typhimurium	JPXX01.0003	19	1	67691	67691	1/26/17	19	FEMALE	HISPANIC	Human	stool	LEE
PNUSAS010871	SAMN06647603	Sandiego	JLXX01.0547	126	12	67888	67888	3/2/17	1	MALE	HISPANIC	Human	stool	DADE
PNUSAS010646	SAMN06647595	Marburg		3867	177	67889	67889	3/8/17	90	FEMALE	UNKNOWN	Human	URINE
PNUSAS010872	SAMN06647604	Newport	JJPX01.0041	5	2	67896	67896	3/15/17	3	FEMALE	NHISPANIC	Human	stool	CLAY
PNUSAS010688	SAMN06641749	IV 48:z4,z32:-		2058	23	68077	68077	2/28/17	0	FEMALE	UNKNOWN	Human		DADE
PNUSAS010686	SAMN06641747	Bere		2023	287	68081	68081	3/3/17	0	MALE	NHISPANIC	Human	stool	BROWARD
PNUSAS010685	SAMN06641746	Poona	JL6X01.0058	1069	46	68120	68120	3/9/17	21	MALE	NHISPANIC	Human	stool	DUVAL
PNUSAS010687	SAMN06641748	Minnesota		548	77	68170	68170	2/28/17	4	FEMALE	NHISPANIC	Human		BROWARD
PNUSAS011235	SAMN06677809	Javiana	JGGX01.0031	24	17	68270	68270	1/13/17	68	MALE	NHISPANIC	Human	stool	ESCAMBIA
PNUSAS011531	SAMN06708758	Sandiego		126	12	68272	68272	2/28/17	6	FEMALE	NHISPANIC	Human	stool	MARION
PNUSAS011241	SAMN06677814	Sandiego	JLXX01.0176	126	12	68272	68272	2/28/17	0	FEMALE	UNKNOWN	Human	stool	DUVAL
PNUSAS011234	SAMN06677808	Muenchen		112	8	68275	68275	1/13/17	0	MALE	NHISPANIC	Human	stool	CALHOUN
PNUSAS011232	SAMN06677819	IV 50:z4,z23:-		2053	301	68278	68278	3/16/17	64	MALE	NHISPANIC	Human	BLOOD	NA
PNUSAS011240	SAMN06677813	Rubislaw	JLPX01.0070	94	133	68285	68285	3/7/17	8	MALE	UNKNOWN	Human	stool	LEE
PNUSAS011237	SAMN06677811	Baildon		2166	399	68286	68286	3/6/17	64	MALE	UNKNOWN	Human	stool	LEE
PNUSAS011236	SAMN06677810	Rubislaw	JLPX01.0059	94	133	68287	68287	1/13/17	0	MALE	NHISPANIC	Human	stool	ALACHUA
PNUSAS011239	SAMN06677812	Newport	JJPX01.0105	118	2	68303	68303	2/21/17	47	MALE	NHISPANIC	Human	stool	CITRUS
PNUSAS047149	SAMN09722372	Enteritidis	JEGX01.0004	11	4	68306	167785	4/7/18	0	MALE	HISPANIC	Human	stool	PALM BEACH
PNUSAS010682	SAMN06641743	Anatum	JAGX01.0467	64	65	68385	68385	3/7/17	51	FEMALE	NHISPANIC	Human	URINE	PUTNAM
PNUSAS010650	SAMN06641757	Rubislaw	JLPX01.0059	94	133	68386	68386	2/14/17	0	MALE	NHISPANIC	Human	stool	BROWARD
PNUSAS010683	SAMN06641744	IV 48:z4,z32:-		2058	23	68388	68388	3/6/17	4	MALE	UNKNOWN	Human	stool	DADE
PNUSAS010684	SAMN06641745	Minnesota	JIGX01.0005	548	77	68390	68390	3/3/17	0	MALE	NHISPANIC	Human	stool	BROWARD
PNUSAS011606	SAMN06708791	Muenchen		112	8	68405	68405	1/5/17	0	FEMALE	UNKNOWN	Human	stool	HILLSBOROUGH
PNUSAS011610	SAMN06708795	Sandiego		126	12	68408	68408	1/6/17	43	MALE	NHISPANIC	Human	stool	ST. LUCIE
PNUSAS011609	SAMN06708794	Reading		93	43	68410	68410	1/6/17	3	FEMALE	NHISPANIC	Human	stool	MANATEE
PNUSAS011539	SAMN06708766	Braenderup	JBPX01.0743	22	24	68411	68411	3/6/17	69	MALE	UNKNOWN	Human	stool	SARASOTA
PNUSAS011540	SAMN06708767	Braenderup	JBPX01.0039	22	24	68411	68411	3/6/17	2	MALE	UNKNOWN	Human	stool	LEON
PNUSAS011457	SAMN06708783	Bareilly	JAPX01.0064	2553	382	68412	68412	1/13/17	21	FEMALE	NHISPANIC	Human	stool	LEE
PNUSAS011607	SAMN06708792	Montevideo	JIXX01.0027	81	40	68413	68413	1/5/17	1	FEMALE	NHISPANIC	Human	stool	HILLSBOROUGH
PNUSAS011461	SAMN06708779	Weltevreden		365	205	68415	68415	2/24/17	61	MALE	NHISPANIC	Human	stool	LEE
PNUSAS010658	SAMN06641765	Paratyphi B var. Java	JKXX01.0014	127	19	68419	68419	1/31/17	8	MALE	HISPANIC	Human	stool	BROWARD
PNUSAS010647	SAMN06641766	Sandiego		126	12	68428	68428	2/18/17	44	MALE	NHISPANIC	Human	stool	BREVARD
PNUSAS010678	SAMN06641753	Rubislaw		1575	204	68429	68429	2/11/17	0	FEMALE	NHISPANIC	Human	stool	POLK
PNUSAS011535	SAMN06708762	Newport	JJPX01.0317	118	2	68541	68541	3/3/17	1	FEMALE	NHISPANIC	Human	stool	BAY
PNUSAS011464	SAMN06708776	Stanley		29	29	68542	68542	2/27/17	2	MALE	UNKNOWN	Human	stool	MANATEE
PNUSAS011463	SAMN06708777	Stanley		29	29	68542	68542	2/27/17	2	MALE	NHISPANIC	Human	stool	HILLSBOROUGH
PNUSAS011459	SAMN06708781	Javiana		24	17	68548	68548	2/28/17	41	FEMALE	UNKNOWN	Human	stool	PASCO
PNUSAS011608	SAMN06708793	Infantis	JFXX01.0787	32	31	68627	68627	1/5/17	2	MALE	HISPANIC	Human	stool	ORANGE
PNUSAS011528	SAMN06708755	Sandiego		126	12	68648	68648	2/27/17	17	MALE	NHISPANIC	Human	stool	SARASOTA
PNUSAS011455	SAMN06708772	Urbana		754	38	68669	68669	3/18/17	0	MALE	HISPANIC	Human	stool	VOLUSIA
PNUSAS011453	SAMN06708774	Saintpaul	JN6X01.0492	95	209	68706	68706	3/20/17	60	FEMALE	NHISPANIC	Human	stool	DUVAL
PNUSAS013963	SAMN07159300	Oranienburg	JJXX01.0028	1675	41	68709	68709	4/19/17	48	FEMALE	UNKNOWN	Human		PALM BEACH
PNUSAS011452	SAMN06708775	Oranienburg	JJXX01.0028	1675	41	68709	68709	3/19/17	76	FEMALE	NHISPANIC	Human	stool	CLAY
PNUSAS011605	SAMN06708790	Typhimurium	JPXX01.0006	19	1	68710	68710	1/6/17	9	FEMALE	NHISPANIC	Human	stool	VOLUSIA
PNUSAS016457	SAMN07342189	Newport	JJPX01.4375	5	2	68712	78236	5/11/17	44	MALE	NHISPANIC	Human	stool
PNUSAS011530	SAMN06708757	Baildon		2166	399	68716	68716	2/24/17	80	MALE	HISPANIC	Human	stool	DADE
PNUSAS011532	SAMN06708759	Javiana	JGGX01.0012	24	17	68717	68717	3/1/17	55	MALE	UNKNOWN	Human	stool	SARASOTA
PNUSAS011536	SAMN06708763	Braenderup	JBPX01.0002	22	24	68719	68719	3/3/17	60	FEMALE	UNKNOWN	Human	stool	ST. LUCIE
PNUSAS011611	SAMN06708796	Javiana	JGGX01.0110	24	17	68720	68720	1/11/17	67	MALE	NHISPANIC	Human	stool	PINELLAS
PNUSAS011534	SAMN06708761	Enteritidis	JEGX01.0092	11	4	68721	68721	3/3/17	59	MALE	NHISPANIC	Human	stool	WASHINGTON
PNUSAS011612	SAMN06708797	Poona		964	315	68726	68726	1/13/17	3	FEMALE	NHISPANIC	Human	stool	DADE
PNUSAS011456	SAMN06708784	Thompson	JP6X01.0022	26	28	68727	68727	1/14/17	1	MALE	NHISPANIC	Human	stool	ORANGE
PNUSAS010652	SAMN06641759	Newport	JJPX01.0025	118	2	68728	68728	2/20/17	74	MALE	NHISPANIC	Human	stool	PALM BEACH
PNUSAS012905	SAMN06924435	Newport	JJPX01.0025	118	2	68728	68728	3/13/17	76	FEMALE	UNKNOWN	Human	stool	PALM BEACH
PNUSAS010677	SAMN06641752	Muenchen		112	8	68731	68731	2/10/17	14	MALE	HISPANIC	Human	stool	HILLSBOROUGH
PNUSAS010653	SAMN06641760	Muenchen	JJ6X01.0555	112	8	68733	68733	2/20/17	1	MALE	NHISPANIC	Human	stool	DADE
PNUSAS010655	SAMN06641762	Newport		45	3	68736	68736	2/13/17	0	MALE	HISPANIC	Human	stool	DADE
PNUSAS010648	SAMN06641755	Baildon	TDEX01.0001	2166	399	68740	68740	2/14/17	74	MALE	NHISPANIC	Human	stool
PNUSAS011968	SAMN06845823	Bareilly	JAPX01.0064	2553	382	68741	69024	3/3/17	8	FEMALE	HISPANIC	Human	stool	DADE
PNUSAS010651	SAMN06641758	Bareilly	JAPX01.0064	2553	382	68741	68741	2/17/17	1	FEMALE	HISPANIC	Human	stool	DADE
PNUSAS011964	SAMN06756769	Braenderup		22	24	68905	68905	3/24/17	64	FEMALE	NHISPANIC	Human	URINE	PASCO
PNUSAS030027	SAMN08166029	Javiana	JGGX01.0012	24	17	68914	68914	10/17/17	3	FEMALE	NHISPANIC	Human	stool	CLAY
PNUSAS011949	SAMN06756757	Javiana	JGGX01.0012	24	17	68914	68914	3/24/17	3	FEMALE	NHISPANIC	Human	stool	CLAY
PNUSAS011955	SAMN06756758	Minnesota	JIGX01.0005	548	77	68919	68919	3/25/17	82	FEMALE	NHISPANIC	Human	URINE	BROWARD
PNUSAS011948	SAMN06756756	IIIa 48:z4,z23,z32:-		3878	NA	68920	68920	3/24/17	71	MALE	UNKNOWN	Human	stool	BREVARD
PNUSAS041790	SAMN09374789	Braenderup	JBPX01.0002	22	24	68954	68954	3/12/18	78	MALE	UNKNOWN	Human	stool	SARASOTA
PNUSAS041789	SAMN09374790	Braenderup	JBPX01.0002	22	24	68954	68954	3/10/18	82	MALE	UNKNOWN	Human	stool	CHARLOTTE
PNUSAS041788	SAMN09374792	Braenderup	JBPX01.0002	22	24	68954	68954	4/5/18	61	FEMALE	NHISPANIC	Human	stool	BAY
PNUSAS013895	SAMN07143133	Braenderup	JBPX01.0002	22	24	68954	68954	4/13/17	0	FEMALE	HISPANIC	Human	stool	OSCEOLA
PNUSAS011958	SAMN06756764	Typhimurium		19	1	68994	68994	3/24/17	2	MALE	NHISPANIC	Human	stool	BREVARD
PNUSAS011613	SAMN06845830	Saintpaul	JN6X01.0048	50	14	69069	69069	3/31/17	3	FEMALE	NHISPANIC	Human	stool	PALM BEACH
PNUSAS011953	SAMN06756761	Gaminara		239	245	69100	69100	3/2/17	39	FEMALE	NHISPANIC	Human	stool	BROWARD
PNUSAS051518	SAMN09880464	Braenderup	JBPX01.0002	22	24	69398	166995	7/31/18	20	MALE	NHISPANIC	Human	stool	ESCAMBIA
PNUSAS051517	SAMN09880425	Braenderup	JBPX01.0002	22	24	69398	166970	7/29/18	5	MALE	NHISPANIC	Human	stool	DUVAL
PNUSAS015122	SAMN07202686	Enteritidis	JEGX01.0004	11	4	69720	69720	4/25/17	30	MALE	NHISPANIC	Human	stool	BROWARD
PNUSAS018327	SAMN07436598	Typhimurium	JPXX01.0033	19	1	69749	69749	6/2/17	1	FEMALE	HISPANIC	Human	stool	LEE
PNUSAS027253	SAMN07837986	Typhimurium	JPXX01.0033	19	1	69749	69749	6/12/17	2	MALE	NHISPANIC	Human
PNUSAS013898	SAMN07143136	Enteritidis	JEGX01.0004	11	4	69802	72670	4/19/17	16	MALE	NHISPANIC	Human	stool	PALM BEACH
PNUSAS012583	SAMN06847184	Muenchen	JJ6X01.1056	2870	8	69961	69961	3/21/17	0	FEMALE	UNKNOWN	Human	stool	BROWARD
PNUSAS012897	SAMN06924427	Muenchen	JJ6X01.1056	2870	8	69961	69961	3/21/17	45	MALE	UNKNOWN	Human	stool	BROWARD
PNUSAS012588	SAMN06847187	Saintpaul	JN6X01.0231	50	14	69992	69992	3/8/17	67	FEMALE	UNKNOWN	Human	stool	DADE
PNUSAS012587	SAMN06847186	Baildon		2166	399	69993	69993	3/13/17	75	FEMALE	UNKNOWN	Human	URINE	BROWARD
PNUSAS012577	SAMN06847179	Infantis	JFXX01.0011	32	31	70024	70024	4/7/17	59	FEMALE	NHISPANIC	Human	stool	BROWARD
PNUSAS013664	SAMN07138686	Infantis	JFXX01.0613	32	31	70024	70024	4/12/17	41	FEMALE	HISPANIC	Human	stool	DADE
PNUSAS012580	SAMN06847182	Enteritidis	JEGX01.0004	11	4	70027	70027	4/8/17	70	MALE	NHISPANIC	Human	BLOOD	BROWARD
PNUSAS027182	SAMN07842067	Braenderup	JBPX01.0182	22	24	70169	181935	4/26/17	78	FEMALE	NHISPANIC	Human	stool	PASCO
PNUSAS011975	SAMN06845829	Sandiego		126	12	70198	70198	1/11/17	1	FEMALE	NHISPANIC	Human	stool
PNUSAS018325	SAMN07414504	Sandiego		126	12	70239	80788	6/1/17	0	MALE	HISPANIC	Human	stool	BROWARD
PNUSAS011969	SAMN06845824	Sandiego	JLXX01.0483	126	12	70239	70239	3/6/17	2	FEMALE	NHISPANIC	Human	stool	BROWARD
PNUSAS011961	SAMN06845820	Braenderup	JBPX01.0163	22	24	70257	70257	3/27/17	0	FEMALE	NHISPANIC	Human	stool	LAKE
PNUSAS013686	SAMN07138677	Typhimurium	JPXX01.2500	19	1	70268	70268	4/12/17	2	MALE	UNKNOWN	Human	stool	DADE
PNUSAS011973	SAMN06845827	Typhimurium	JPXX01.0018	19	1	70268	70268	3/22/17	30	MALE	HISPANIC	Human
PNUSAS012582	SAMN06847183	Nima		1254	445	70280	70280	2/6/17	65	MALE	UNKNOWN	Human	stool	COLLIER
PNUSAS011827	SAMN06845832	Javiana	JGGX01.0730	24	17	70287	70287	3/31/17	41	MALE	UNKNOWN	Human	stool	NA
PNUSAS011974	SAMN06845828	Javiana	JGGX01.2123	24	17	70291	70291	1/10/17	38	FEMALE	HISPANIC	Human	stool	ORANGE
PNUSAS011951	SAMN06845819	Oranienburg	JJXX01.0028	23	41	70383	70383	3/22/17	82	MALE	NHISPANIC	Human	URINE	ALACHUA
PNUSAS016923	SAMN07436221	Agona	JABX01.0451	13	54	70668	71736	5/4/17	1	FEMALE	UNKNOWN	Human	stool	NA
PNUSAS012902	SAMN06924432	Gatuni|Konstanz		3499	427	70756	70756	3/23/17	61	FEMALE	HISPANIC	Human	stool	BROWARD
PNUSAS013301	SAMN06924455	IV 57:z4,z23:-	AWMX01.0003	433	23	70757	70757	3/31/17	0	MALE	NHISPANIC	Human	stool	BROWARD
PNUSAS013298	SAMN06924453	Braenderup	JBPX01.0241	22	24	70760	70760	3/27/17	84	MALE	UNKNOWN	Human	URINE	BREVARD
PNUSAS012576	SAMN06924450	Manhattan		18	27	70774	70774	4/5/17	1	FEMALE	NHISPANIC	Human	stool	VOLUSIA
PNUSAS013297	SAMN06924452	Give		516	67	70776	70776	4/3/17	24	MALE	NHISPANIC	Human	BLOOD	MARION
PNUSAS013303	SAMN06924457	IV 50:z4,z23:-		2505	301	70777	70777	3/24/17	0	FEMALE	NHISPANIC	Human	stool	BROWARD
PNUSAS012917	SAMN06924447	Braenderup	JBPX01.0096	22	24	70782	70782	3/30/17	18	MALE	UNKNOWN	Human	stool	PALM BEACH
PNUSAS014761	SAMN07197376	Sandiego		126	12	70784	74745	3/9/17	6	MALE	NHISPANIC	Human	stool	BROWARD
PNUSAS014762	SAMN07197377	Sandiego		126	12	70784	74745	3/8/17	61	FEMALE	HISPANIC	Human	stool	BROWARD
PNUSAS012893	SAMN06924423	Sandiego		126	12	70784	70784	3/14/17	9	MALE	UNKNOWN	Human	stool	BROWARD
PNUSAS012895	SAMN06924425	Javiana	JGGX01.0310	24	17	70785	70789	3/21/17	2	MALE	HISPANIC	Human	stool	PALM BEACH
PNUSAS012896	SAMN06924426	Javiana	JGGX01.0310	24	17	70785	70785	3/21/17	1	FEMALE	NHISPANIC	Human	stool	PALM BEACH
PNUSAS012904	SAMN06924434	Javiana	JGGX01.0119	1674	17	70786	70786	3/13/17	3	MALE	UNKNOWN	Human	stool	BROWARD
PNUSAS013302	SAMN06924456	IV 50:z4,z23:-		2053	301	70793	70793	3/24/17	0	MALE	NHISPANIC	Human	stool	BROWARD
PNUSAS012912	SAMN06924442	Agona	JABX01.0783	13	54	70795	70795	3/28/17	2	MALE	UNKNOWN	Human	stool	DADE
PNUSAS012913	SAMN06924443	Saintpaul	JN6X01.0049	50	14	70796	70796	3/28/17	2	FEMALE	UNKNOWN	Human	stool	COLLIER
PNUSAS013675	SAMN07138697	Give		654	239	71189	71189	1/6/17	0	FEMALE	HISPANIC	Human	stool	DADE
PNUSAS013666	SAMN07138688	IV 50:z4,z23:-		2053	301	71192	71192	4/17/17	69	MALE	NHISPANIC	Human	stool	VOLUSIA
PNUSAS013679	SAMN07138670	Saintpaul	JN6X01.0007	50	14	71220	71220	3/31/17	3	MALE	NHISPANIC	Human	stool	BROWARD
PNUSAS013685	SAMN07138676	Baildon		2166	399	71226	71226	4/11/17	0	MALE	UNKNOWN	Human	stool	DADE
PNUSAS013683	SAMN07138674	Oranienburg	JJXX01.0028	1675	41	71228	71228	4/5/17	35	FEMALE	NHISPANIC	Human	stool	PALM BEACH
PNUSAS013665	SAMN07138687	Oranienburg		1392	203	71232	71232	4/8/17	16	MALE	NHISPANIC	Human	stool	DADE
PNUSAS013670	SAMN07138692	IIIb 61:l,v:1,5,7:[z57]		243	10	71249	71249	4/25/17	81	FEMALE	NHISPANIC	Human	stool	SARASOTA
PNUSAS013673	SAMN07138695	IV 50:z4,z23:-		2053	301	71260	71260	4/17/17	26	FEMALE	UNKNOWN	Human		PALM BEACH
PNUSAS013669	SAMN07138691	O60:r:1,5,(7)		63	225	71349	71349	4/1/17	72	FEMALE	NHISPANIC	Human	URINE	SANTA ROSA
PNUSAS013684	SAMN07138675	Poona	JL6X01.0868	447	46	71369	71369	4/10/17	1	MALE	NHISPANIC	Human	stool	PALM BEACH
PNUSAS013659	SAMN07138681	Javiana	JGGX01.0094	24	17	71375	71375	4/17/17	5	FEMALE	NHISPANIC	Human	URINE	VOLUSIA
PNUSAS013674	SAMN07138696	Urbana		754	38	71376	71376	4/19/17	1	MALE	NHISPANIC	Human		BROWARD
PNUSAS013687	SAMN07138678	Sandiego	JLXX01.0756	126	12	71381	71381	4/12/17	2	FEMALE	NHISPANIC	Human	stool	PALM BEACH
PNUSAS013671	SAMN07138693	Hartford		405	169	71386	71386	4/26/17	78	MALE	NHISPANIC	Human	stool	NASSAU
PNUSAS013682	SAMN07138673	Anatum	JAGX01.0481	64	65	71408	71408	4/3/17	28	FEMALE	UNKNOWN	Human	stool	DADE
PNUSAS013663	SAMN07138685	Sandiego		2818	12	71414	71414	4/6/17	5	MALE	NHISPANIC	Human	stool	BROWARD
PNUSAS013667	SAMN07138689	Enteritidis	JEGX01.0005	11	4	71449	71449	4/14/17	45	MALE	NHISPANIC	Human	BLOOD	HILLSBOROUGH
PNUSAS013677	SAMN07138699	IV 50:z4,z23:-		2053	301	71491	71491	4/18/17	0	MALE	NHISPANIC	Human	BLOOD	ST. LUCIE
PNUSAS013680	SAMN07138671	Montevideo	JIXX01.0140	4	40	71931	71931	4/3/17	0	FEMALE	UNKNOWN	Human	stool	BROWARD
PNUSAS020689	SAMN07487373	IV 48:g,z51:-		433	23	72169	82663	7/16/17	69	MALE	NHISPANIC	Human	stool	BROWARD
PNUSAS013676	SAMN07138698	IV 48:g,z51:-		433	23	72169	72169	4/22/17	0	MALE	HISPANIC	Human	stool	DADE
PNUSAS013681	SAMN07138672	Montevideo	JIXX01.0140	195	40	72387	72387	4/3/17	0	MALE	UNKNOWN	Human	stool	PALM BEACH
PNUSAS013967	SAMN07159305	Meleagridis		463	83	72629	72629	3/20/17	56	FEMALE	NHISPANIC	Human	stool	HILLSBOROUGH
PNUSAS016440	SAMN07436218	Enteritidis	JEGX01.0953	11	4	72630	72630	3/25/17	8	FEMALE	UNKNOWN	Human	stool	HILLSBOROUGH
PNUSAS013970	SAMN07159308	Enteritidis	JEGX01.0953	11	4	72630	72630	3/27/17	46	FEMALE	NHISPANIC	Human	stool	PASCO
PNUSAS012916	SAMN06924446	Durham		2225	261.2	72631	72631	3/30/17	3	FEMALE	NHISPANIC	Human	stool	BROWARD
PNUSAS013972	SAMN07159310	I 1,4,[5],12:b:-	JKXX01.0616	1838	155	72632	72632	3/20/17	62	FEMALE	NHISPANIC	Human	stool	CALHOUN
PNUSAS012909	SAMN06924439	Typhimurium	JPXX01.0001	19	1	72633	72633	3/27/17	4	FEMALE	UNKNOWN	Human	stool	DADE
PNUSAS013966	SAMN07159303	Typhimurium	JN6X01.0335	19	1	72634	72634	3/12/17	1	FEMALE	NHISPANIC	Human	stool	DADE
PNUSAS012910	SAMN06924440	Enteritidis	JEGX01.0021	11	4	72636	72636	3/28/17	8	FEMALE	NHISPANIC	Human	stool	MARTIN
PNUSAS012901	SAMN06924431	I 4,[5],12:i:-	JPXX01.4319	34	1	72638	72638	3/23/17	72	FEMALE	UNKNOWN	Human	stool	PALM BEACH
PNUSAS013900	SAMN07143138	IV 50:z4,z23:-		2053	301	72640	72640	4/13/17	0	FEMALE	HISPANIC	Human	stool	COLLIER
PNUSAS013884	SAMN07143122	Typhimurium	JPXX01.0359	19	1	72642	72642	4/10/17	68	MALE	NHISPANIC	Human	stool	PUTNAM
PNUSAS013890	SAMN07143128	Javiana	JGGX01.1551	1674	17	72644	72644	4/16/17	69	FEMALE	NHISPANIC	Human	URINE	SEMINOLE
PNUSAS013974	SAMN07159312	Sandiego	JLXX01.0737	126	12	72645	72645	3/31/17	1	MALE	NHISPANIC	Human	stool
PNUSAS013973	SAMN07159311	Rubislaw	JLPX01.0059	94	133	72646	72646	3/17/17	0	MALE	UNKNOWN	Human	stool	BREVARD
PNUSAS013887	SAMN07143125	Saintpaul	JN6X01.0158	50	14	72647	72647	4/16/17	1	FEMALE	HISPANIC	Human	stool	BROWARD
PNUSAS013885	SAMN07143123	Rubislaw		1575	204	72648	72648	4/13/17	0	MALE	NHISPANIC	Human	stool	DUVAL
PNUSAS013879	SAMN07143117	Saintpaul	JN6X01.0044	95	209	72649	72649	4/6/17	48	MALE	HISPANIC	Human	stool	DUVAL
PNUSAS013877	SAMN07143115	Meleagridis	JHXX01.0060	463	83	72650	72650	4/6/17	36	FEMALE	NHISPANIC	Human	stool	DUVAL
PNUSAS013883	SAMN07143121	Thompson	JP6X01.0022	26	28	72652	72652	4/5/17	82	MALE	NHISPANIC	Human	BLOOD
PNUSAS013880	SAMN07143118	Mbandaka	TDRX01.0087	413	62	72655	72655	4/7/17	61	FEMALE	NHISPANIC	Human	URINE	DUVAL
PNUSAS013300	SAMN07159314	Newport	JJPX01.0438	118	2	72656	72656	4/2/17	77	FEMALE	HISPANIC	Human	URINE	SEMINOLE
PNUSAS013897	SAMN07143135	Baildon	TDEX01.0002	2166	399	72668	72668	4/13/17	21	FEMALE	NHISPANIC	Human	stool	LEE
PNUSAS030384	SAMN08294545	Montevideo	JJXX01.0027	81	40	72669	72669	10/30/17	8	FEMALE	NHISPANIC	Human	stool	BREVARD
PNUSAS011966	SAMN07143141	Montevideo	JIXX01.0112	81	40	72669	72669	3/7/17	0	FEMALE	NHISPANIC	Human	stool	PALM BEACH
PNUSAS013964	SAMN07159301	Montevideo	JIXX01.0140	195	40	72671	72671	4/19/17	3	MALE	HISPANIC	Human		BROWARD
PNUSAS013902	SAMN07143140	Javiana	JGGX01.0013	24	17	72672	72672	4/9/17	9	FEMALE	NHISPANIC	Human	URINE	OSCEOLA
PNUSAS013889	SAMN07143127	Braenderup	JBPX01.0150	22	24	72673	72673	4/12/17	32	FEMALE	NHISPANIC	Human	URINE	VOLUSIA
PNUSAS013965	SAMN07159302	Braenderup	JBPX01.0002	22	24	72679	72679	4/22/17	74	FEMALE	NHISPANIC	Human		BROWARD
PNUSAS013899	SAMN07143137	Montevideo	JIXX01.1790	81	40	72682	72682	4/17/17	2	MALE	NHISPANIC	Human	stool	PUTNAM
PNUSAS017646	SAMN07370927	I 4,[5],12:i:-	JPXX01.0176	19	1	72712	72712	4/10/17	34	MALE	UNKNOWN	Human	stool	HILLSBOROUGH
PNUSAS014756	SAMN07197372	I 4,[5],12:i:-	JPXX01.0176	19	1	72712	72712	3/21/17	45	FEMALE	UNKNOWN	Human	stool	SARASOTA
PNUSAS037765	SAMN08815107	Newport	JJPX01.0438	118	2	72868	114777	1/29/18	64	MALE	NHISPANIC	Human	stool	OSCEOLA
PNUSAS035443	SAMN08622699	Infantis	JBPX01.0002	32	31	73006	73006	11/19/17	20	FEMALE	NHISPANIC	Human		DADE
PNUSAS026563	SAMN07795634	Typhimurium	JPXX01.5110	3975	1	73033	73033	5/15/17	67	FEMALE	NHISPANIC	Human	stool	ST. JOHNS
PNUSAS017046	SAMN07352795	Typhimurium		3975	1	73033	73033	5/15/17	49	FEMALE	UNKNOWN	Human	stool	HILLSBOROUGH
PNUSAS018364	SAMN07352355	Typhimurium	JPXX01.5110	3975	1	73033	73033	5/16/17	61	FEMALE	UNKNOWN	Human	stool	PINELLAS
PNUSAS015111	SAMN07202674	Typhimurium	JPXX01.5110	3975	1	73033	73033	5/9/17	41	FEMALE	NHISPANIC	Human	stool	PINELLAS
PNUSAS014730	SAMN07190284	Typhimurium	JPXX01.5110	3975	1	73033	73033	5/10/17	61	FEMALE	NHISPANIC	Human	stool	PINELLAS
PNUSAS026562	SAMN07795633	Typhimurium	JPXX01.5110	3975	1	73033	73033	5/17/17	12	FEMALE	NHISPANIC	Human	stool	SANTA ROSA
PNUSAS026561	SAMN07795632	Typhimurium	JPXX01.5110	3975	1	73033	73033	5/16/17	8	MALE	NHISPANIC	Human	stool	ST. JOHNS
PNUSAS026564	SAMN07795635	Typhimurium	JPXX01.5110	3975	1	73033	73033	5/17/17	1	FEMALE	UNKNOWN	Human	stool
PNUSAS041786	SAMN09374780	Braenderup	JBPX01.0002	22	24	73599	125477	3/21/18	17	FEMALE	NHISPANIC	Human	stool	LAKE
PNUSAS024609	SAMN07715094	Typhimurium	JPXX01.4996	19	1	73639	91825	7/24/17	13	FEMALE	NHISPANIC	Human	stool	DUVAL
PNUSAS015124	SAMN07247100	Typhimurium	JPXX01.0604	19	1	73648	75432	4/30/17	69	MALE	NHISPANIC	Human	stool	MONROE
PNUSAS017651	SAMN07414533	Enteritidis	JEGX01.0005	11	4	73920	80750	4/11/17	39	FEMALE	NHISPANIC	Human	stool	MANATEE
PNUSAS018900	SAMN07414527	Braenderup	JBPX01.0182	22	24	74264	74264	6/21/17	15	FEMALE	NHISPANIC	Human	stool	ORANGE
PNUSAS020164	SAMN07436227	I 4,[5],12:i:-	JPXX01.4578	19	1	74336	82272	6/1/17	2	MALE	HISPANIC	Human	stool	BROWARD
PNUSAS014733	SAMN07190287	IV 50:z4,z23:-		2053	301	74410	74410	5/4/17	0	MALE	NHISPANIC	Human	stool	PALM BEACH
PNUSAS014721	SAMN07190291	Poona		964	315	74416	74416	1/4/17	3	FEMALE	NHISPANIC	Human	stool
PNUSAS014722	SAMN07190292	Poona	JL6X01.0525	964	315	74423	74423	1/5/17	1	FEMALE	HISPANIC	Human	stool
PNUSAS027258	SAMN07837991	Oranienburg	JJXX01.1319	23	41	74427	95486	6/12/17	16	MALE	UNKNOWN	Human	stool	PALM BEACH
PNUSAS024608	SAMN07715093	Oranienburg	JJXX01.1319	23	41	74427	91441	7/26/17	28	FEMALE	NHISPANIC	Human	stool	DADE
PNUSAS012584	SAMN07190280	Baildon	TDEX01.0012	2166	399	74435	74435	3/13/17	77	MALE	UNKNOWN	Human	stool
PNUSAS014729	SAMN07190283	IV 50:z4,z23:-		2053	301	74608	74608	5/3/17	6	FEMALE	UNKNOWN	Human	stool	DADE
PNUSAS016155	SAMN07227146	Sandiego		126	12	74616	74616	4/16/17	0	MALE	NHISPANIC	Human	BLOOD	BROWARD
PNUSAS013980	SAMN07159298	Sandiego		126	12	74616	74616	4/16/17	2	MALE	NHISPANIC	Human	BLOOD	BROWARD
PNUSAS014726	SAMN07190281	Arechavaleta		238	12	74617	74617	5/10/17	70	FEMALE	NHISPANIC	Human	stool	BROWARD
PNUSAS014724	SAMN07190294	Saintpaul	JN6X01.0044	95	209	74619	74619	1/3/17	80	MALE	NHISPANIC	Human	BLOOD	ALACHUA
PNUSAS014725	SAMN07190295	Typhimurium		19	1	74623	74623	1/6/17	66	FEMALE	NHISPANIC	Human	URINE	VOLUSIA
PNUSAS014723	SAMN07190293	IV 50:z4,z23:-		4008	301	74635	74635	1/3/17	41	MALE	NHISPANIC	Human	BLOOD	BROWARD
PNUSAS014727	SAMN07190282	Weltevreden		365	205	74639	74639	5/9/17	42	FEMALE	HISPANIC	Human	stool	BROWARD
PNUSAS014732	SAMN07190286	Typhimurium	JPXX01.0150	19	1	74642	74642	5/10/17	59	MALE	NHISPANIC	Human	stool
PNUSAS022593	SAMN07688198	Paratyphi B var. Java	JKXX01.1045	127	19	74681	90028	5/27/17	1	MALE	NHISPANIC	Human	stool	DADE
PNUSAS015123	SAMN07202687	Paratyphi B var. Java		127	19	74681	74681	4/23/17	26	MALE	NHISPANIC	Human	stool	DADE
PNUSAS014750	SAMN07197367	Muenchen		112	8	74715	74715	3/12/17	1	MALE	NHISPANIC	Human	stool	HILLSBOROUGH
PNUSAS014753	SAMN07197369	Newport	JJPX01.3716	46	3	74716	74716	2/27/17	0	MALE	HISPANIC	Human	stool	DADE
PNUSAS016936	SAMN07342203	IV 50:z4,z23:-		2053	301	74719	78139	5/31/17	62	MALE	HISPANIC	Human	stool	HILLSBOROUGH
PNUSAS015096	SAMN07202659	IV 50:z4,z23:-		2053	301	74719	74719	5/4/17	0	MALE	HISPANIC	Human	stool	ORANGE
PNUSAS014061	SAMN07197380	Braenderup		22	24	74722	74722	2/21/17	2	FEMALE	UNKNOWN	Human		DADE
PNUSAS015097	SAMN07202660	IV 50:z4,z23:-		2053	301	74723	74723	5/2/17	1	FEMALE	UNKNOWN	Human	stool	DADE
PNUSAS015092	SAMN07202655	Miami		80	111	74724	74724	1/8/17	75	FEMALE	NHISPANIC	Human	stool	NA
PNUSAS015136	SAMN07202699	Weltevreden	JQPX01.0048	365	205	74729	74729	5/4/17	0	FEMALE	UNKNOWN	Human		DADE
PNUSAS014751	SAMN07198348	Braenderup	JBPX01.0039	22	24	74730	74730	3/13/17	57	FEMALE	UNKNOWN	Human	stool	HILLSBOROUGH
PNUSAS015103	SAMN07202666	IV 50:z4,z23:-		2053	301	74732	74732	5/14/17	27	MALE	HISPANIC	Human	stool	PASCO
PNUSAS015102	SAMN07202665	IV 50:z4,z23:-		2053	301	74732	74732	5/12/17	0	MALE	NHISPANIC	Human	stool	DUVAL
PNUSAS015099	SAMN07202662	Newport	JJPX01.0036	118	2	74734	74734	5/13/17	45	MALE	NHISPANIC	Human	stool	ST. JOHNS
PNUSAS014742	SAMN07197361	Sandiego		126	12	74740	74740	4/27/17	3	MALE	NHISPANIC	Human	BLOOD	ST. JOHNS
PNUSAS015132	SAMN07202695	Reading		93	43	74741	74741	5/2/17	43	FEMALE	UNKNOWN	Human		COLLIER
PNUSAS015120	SAMN07202683	Newport	JJPX01.0696	118	2	74744	74744	5/16/17	22	MALE	NHISPANIC	Human	stool	PINELLAS
PNUSAS014752	SAMN07197368	Anatum	JAGX01.0001	64	65	74747	74747	2/25/17	64	FEMALE	NHISPANIC	Human	stool	MARION
PNUSAS014749	SAMN07197366	Rubislaw		1575	204	74748	74748	3/8/17	0	FEMALE	NHISPANIC	Human	stool	VOLUSIA
PNUSAS015108	SAMN07202671	Muenchen		112	8	74749	74749	5/13/17	69	MALE	NHISPANIC	Human	stool	CLAY
PNUSAS015135	SAMN07202698	Manhattan		18	27	74756	74756	5/3/17	0	MALE	UNKNOWN	Human		BROWARD
PNUSAS015128	SAMN07202691	Oranienburg	JJXX01.1293	1675	41	74758	74758	4/24/17	45	FEMALE	NHISPANIC	Human	stool	PALM BEACH
PNUSAS014759	SAMN07197375	Muenchen	JJ6X01.0339	2870	8	74761	74761	3/29/17	10	FEMALE	UNKNOWN	Human	stool	DADE
PNUSAS015104	SAMN07202667	Guinea	JJXX01.0658	3310	495	74764	74764	5/14/17	0	FEMALE	NHISPANIC	Human	stool	HILLSBOROUGH
PNUSAS015106	SAMN07202669	Typhimurium	JPXX01.0018	19	1	74776	74776	5/12/17	26	FEMALE	HISPANIC	Human	BLOOD	ORANGE
PNUSAS015095	SAMN07202658	Enteritidis	JEGX01.0002	11	4	74780	74780	5/6/17	59	MALE	NHISPANIC	Human	stool	COLLIER
PNUSAS015112	SAMN07202675	Javiana	JGGX01.0419	24	17	74781	74781	5/12/17	53	FEMALE	NHISPANIC	Human	stool	POLK
PNUSAS014745	SAMN07197364	Javiana	JGGX01.0113	1674	17	74788	74788	4/25/17	66	FEMALE	NHISPANIC	Human	URINE	NA
PNUSAS014757	SAMN07197373	Braenderup	JBPX01.0039	22	24	74790	74790	3/21/17	80	MALE	NHISPANIC	Human	stool	LAKE
PNUSAS015110	SAMN07202673	Braenderup	JBPX01.0583	22	24	74792	74792	5/15/17	36	MALE	NHISPANIC	Human	stool	PINELLAS
PNUSAS015114	SAMN07202677	Anatum		64	65	74794	74794	5/10/17	98	FEMALE	NHISPANIC	Human	URINE	POLK
PNUSAS015121	SAMN07202685	Newport	JJPX01.0538	45	3	74796	74796	4/3/17	3	MALE	NHISPANIC	Human	stool	PALM BEACH
PNUSAS015119	SAMN07202682	Muenchen	JJ6X01.3405	112	8	74799	74799	5/14/17	81	FEMALE	NHISPANIC	Human	stool	GULF
PNUSAS015090	SAMN07202653	Javiana	JGGX01.1641	24	17	74817	74817	1/7/17	68	MALE	HISPANIC	Human	BLOOD	PALM BEACH
PNUSAS014734	SAMN07197353	Alachua		1298	282	74825	74825	4/26/17	2	MALE	NHISPANIC	Human	FECES	BROWARD
PNUSAS014754	SAMN07197370	IV 50:z4,z23:-		2053	301	74867	74867	3/6/17	0	MALE	UNKNOWN	Human	stool	HILLSBOROUGH
PNUSAS015117	SAMN07202680	Newport	JJPX01.0105	118	2	74906	74906	5/19/17	1	MALE	NHISPANIC	Human	stool	VOLUSIA
PNUSAS014744	SAMN07197363	Anatum	JAGX01.0013	64	65	74930	74930	4/24/17	62	FEMALE	NHISPANIC	Human	URINE	MARTIN
PNUSAS027249	SAMN07837982	I 4,[5],12:i:-	JPXX01.1314	34	1	74956	74956	5/6/17	3	FEMALE	UNKNOWN	Human	stool	DADE
PNUSAS013977	SAMN07202684	I 4,[5],12:i:-	JPXX01.4919	34	1	74956	74956	4/13/17	21	FEMALE	HISPANIC	Human	stool	BROWARD
PNUSAS014758	SAMN07197374	Rubislaw	JLPX01.0059	94	133	74982	74982	3/20/17	74	MALE	NHISPANIC	Human	stool	SARASOTA
PNUSAS020173	SAMN07436236	Infantis	JFXX01.0300	32	31	75322	75322	6/16/17	0	MALE	NHISPANIC	Human	stool	NA
PNUSAS015127	SAMN07202690	Saintpaul	JN6X01.0048	50	14	75346	75346	4/26/17	3	MALE	UNKNOWN	Human	stool	DADE
PNUSAS015619	SAMN07247109	Javiana	JGGX01.0174	24	17	75365	75365	5/14/17	34	FEMALE	NHISPANIC	Human	URINE	CLAY
PNUSAS015605	SAMN07247099	Muenchen		112	8	75368	75368	5/12/17	65	FEMALE	NHISPANIC	Human	URINE	ST. JOHNS
PNUSAS015611	SAMN07248064	Bareilly	JAPX01.0665	2553	382	75376	75376	5/17/17	52	MALE	NHISPANIC	Human	stool	BROWARD
PNUSAS015604	SAMN07247098	Minnesota	JIGX01.0005	548	77	75377	75377	5/12/17	50	FEMALE	NHISPANIC	Human	BLOOD	HERNANDO
PNUSAS015609	SAMN07247104	Pensacola		2361	409	75378	75378	5/16/17	0	FEMALE	NHISPANIC	Human	stool	LEON
PNUSAS015602	SAMN07247096	Miami		80	111	75380	75380	5/8/17	46	FEMALE	NHISPANIC	Human	stool	NA
PNUSAS015610	SAMN07248063	Gaminara		239	245	75388	75388	5/20/17	0	MALE	NHISPANIC	Human	stool	DUVAL
PNUSAS015608	SAMN07247103	IV 50:z4,z23:-		2053	301	75389	75389	5/16/17	0	MALE	HISPANIC	Human	stool	HILLSBOROUGH
PNUSAS015617	SAMN07247108	IV 48:z4,z32:-		2058	23	75390	75390	5/11/17	0	FEMALE	NHISPANIC	Human		DADE
PNUSAS015601	SAMN07247095	Sandiego	JLXX01.0013	4026	12	75412	75412	5/8/17	6	FEMALE	NHISPANIC	Human	stool	PASCO
PNUSAS015607	SAMN07247102	Stanley		29	29	75424	75424	5/18/17	26	FEMALE	NHISPANIC	Human	stool	PINELLAS
PNUSAS015620	SAMN07247110	Javiana	JGGX01.0094	24	17	75425	75425	5/16/17	5	MALE	NHISPANIC	Human	stool	ORANGE
PNUSAS015612	SAMN07247105	IV 1,40:z4,z24:-		2868	419	75426	75426	5/19/17	58	FEMALE	NHISPANIC	Human	URINE	VOLUSIA
PNUSAS053361	SAMN09989603	Newport	JJPX01.0384	118	2	75478	166993	8/4/18	1	MALE	NHISPANIC	Human	stool	ST. JOHNS
PNUSAS043552	SAMN09430445	Newport	JJPX01.0384	118	2	75478	127346	3/28/18	59	FEMALE	NHISPANIC	Human		CLAY
PNUSAS031695	SAMN08292372	Newport	JJPX01.0384	118	2	75478	110518	11/3/17	0	FEMALE	NHISPANIC	Human	stool	ST. JOHNS
PNUSAS019041	SAMN07436596	Newport	JJPX01.0384	118	2	75478	81622	6/27/17	46	MALE	NHISPANIC	Human	stool	DUVAL
PNUSAS016140	SAMN07227130	Typhimurium	JPXX01.1212	19	1	75634	75634	4/30/17	7	FEMALE	NHISPANIC	Human	stool	DUVAL
PNUSAS016148	SAMN07227138	Putten		1656	323	75701	75701	5/4/17	0	MALE	NHISPANIC	Human	BLOOD	ST. JOHNS
PNUSAS016137	SAMN07227127	IV 50:z4,z23:-		2053	301	75703	75703	1/8/17	62	FEMALE	NHISPANIC	Human	URINE	BROWARD
PNUSAS016142	SAMN07227132	Newport	JJPX01.0741	45	3	75705	75705	5/2/17	38	FEMALE	NHISPANIC	Human	stool	OKALOOSA
PNUSAS016144	SAMN07227134	Gaminara		2150	245	75706	75706	5/1/17	79	MALE	NHISPANIC	Human	URINE	ALACHUA
PNUSAS016139	SAMN07227129	IV 44:z4,z23:-		433	23	75707	75707	1/7/17	0	FEMALE	HISPANIC	Human	stool	BROWARD
PNUSAS016141	SAMN07227131	I 4,[5],12:b:-|Schleissheim	JKXX01.1478	423	32	75709	75709	5/2/17	60	FEMALE	NHISPANIC	Human	stool	COLLIER
PNUSAS016149	SAMN07227139	Poona	JL6X01.0510	447	46	75710	75710	5/3/17	2	FEMALE	NHISPANIC	Human	URINE	PALM BEACH
PNUSAS016192	SAMN07227148	Sandiego	JLXX01.0121	126	12	75720	75720	4/19/17	61	FEMALE	UNKNOWN	Human	stool	PALM BEACH
PNUSAS016154	SAMN07227144	Urbana	JQGX01.0087	754	38	75723	75723	5/3/17	0	FEMALE	HISPANIC	Human	stool	BROWARD
PNUSAS016153	SAMN07227143	Manhattan		18	27	75724	75724	4/22/17	0	MALE	HISPANIC	Human	stool	DADE
PNUSAS016143	SAMN07227133	Sandiego	JLXX01.0176	126	12	75725	75725	5/1/17	3	MALE	NHISPANIC	Human		INDIAN RIVER
PNUSAS013978	SAMN07227145	Uganda	TDWX01.0039	684	157	75726	75726	4/14/17	0	MALE	HISPANIC	Human	stool	DADE
PNUSAS016152	SAMN07227142	Paratyphi B var. Java	JKXX01.0031	88	19	75730	75730	5/4/17	74	FEMALE	NHISPANIC	Human	stool	DUVAL
PNUSAS016199	SAMN07260210	Braenderup	JBPX01.0212	22	24	75770	76750	5/26/17	25	MALE	NHISPANIC	Human	stool	DUVAL
PNUSAS016200	SAMN07260211	Braenderup	JBPX01.0497	22	24	76426	76426	5/24/17	24	FEMALE	HISPANIC	Human	stool	DUVAL
PNUSAS016317	SAMN07269313	Oranienburg	JJXX01.0020	1675	41	76427	76427	5/3/17	67	MALE	NHISPANIC	Human	stool
PNUSAS016210	SAMN07260221	Javiana	JGGX01.2412	24	17	76428	76428	5/29/17	11	FEMALE	HISPANIC	Human	stool	COLLIER
PNUSAS016212	SAMN07260223	Stanley		29	29	76430	76430	5/22/17	63	MALE	NHISPANIC	Human	BLOOD	FLAGLER
PNUSAS016204	SAMN07260215	Sandiego		126	12	76432	76432	5/25/17	86	FEMALE	NHISPANIC	Human	URINE
PNUSAS017695	SAMN07352378	Braenderup	JBPX01.0104	22	24	76447	76447	6/5/17	22	FEMALE	UNKNOWN	Human	stool	NA
PNUSAS016437	SAMN07342174	Javiana	JGGX01.0023	24	17	76459	76459	3/15/17	1	MALE	HISPANIC	Human	stool	MANATEE
PNUSAS016336	SAMN07269332	Javiana	JGGX01.0023	24	17	76459	76459	3/22/17	9	FEMALE	UNKNOWN	Human	stool	MANATEE
PNUSAS018332	SAMN07414508	Poona	JL6X01.0889	964	315	76475	80751	6/5/17	4	FEMALE	HISPANIC	Human	stool	DADE
PNUSAS016342	SAMN07269331	Poona	JL6X01.0768	964	315	76475	76475	5/19/17	2	FEMALE	HISPANIC	Human		DADE
PNUSAS016205	SAMN07260216	IV 50:z4,z23:-		2053	301	76597	76597	5/23/17	53	FEMALE	NHISPANIC	Human	stool	PALM BEACH
PNUSAS016333	SAMN07269328	IV 50:z4,z23:-		2053	301	76673	76673	5/10/17	0	FEMALE	NHISPANIC	Human	BLOOD	DADE
PNUSAS016316	SAMN07269312	Sandiego		126	12	76675	76675	5/1/17	78	MALE	NHISPANIC	Human	stool	ORANGE
PNUSAS016203	SAMN07260214	Anatum	JAGX01.0013	64	65	76677	76677	5/22/17	70	FEMALE	NHISPANIC	Human	URINE	LEON
PNUSAS016337	SAMN07269333	Enteritidis	JEGX01.0004	11	4	76682	76682	3/23/17	36	MALE	UNKNOWN	Human	stool	DUVAL
PNUSAS016211	SAMN07260222	Typhimurium	JPXX01.0359	19	1	76685	76685	5/23/17	59	MALE	NHISPANIC	Human	URINE	POLK
PNUSAS016331	SAMN07269326	Enteritidis	JEGX01.0005	11	4	76686	76686	5/27/17	85	FEMALE	NHISPANIC	Human	stool	PUTNAM
PNUSAS017047	SAMN07352796	Enteritidis	JEGX01.0004	11	4	76687	76687	5/16/17	55	FEMALE	NHISPANIC	Human	stool	MARION
PNUSAS016326	SAMN07269321	Enteritidis	JEGX01.0004	11	4	76687	76687	5/17/17	60	MALE	NHISPANIC	Human	stool	BREVARD
PNUSAS024335	SAMN07715085	Poona	JL6X01.0542	964	315	76696	91445	6/26/17	71	MALE	HISPANIC	Human	stool	BROWARD
PNUSAS016328	SAMN07269323	Poona	JL6X01.0542	964	315	76696	76696	5/15/17	3	MALE	HISPANIC	Human	stool	BROWARD
PNUSAS016208	SAMN07260219	Tallahassee		735	328.2	76697	76697	5/28/17	0	MALE	NHISPANIC	Human	stool	DUVAL
PNUSAS016338	SAMN07269334	Thompson	JP6X01.0438	26	28	76698	76698	3/24/17	1	FEMALE	UNKNOWN	Human	stool	LEE
PNUSAS016320	SAMN07269315	Javiana	JGGX01.0915	24	17	76741	76741	5/19/17	65	FEMALE	NHISPANIC	Human	stool	VOLUSIA
PNUSAS016318	SAMN07269314	Montevideo	JIXX01.0027	81	40	76744	76744	4/27/17	0	MALE	NHISPANIC	Human		LEON
PNUSAS016207	SAMN07260218	Typhimurium	JPXX01.2336	213	1	76745	76745	5/22/17	81	MALE	NHISPANIC	Human	stool	ST. LUCIE
PNUSAS016321	SAMN07269316	IV 50:z4,z23:-		2053	301	76746	76746	5/21/17	1	MALE	HISPANIC	Human	BLOOD	DADE
PNUSAS016330	SAMN07269325	IV 50:z4,z23:-		2053	301	76748	76748	5/13/17	0	FEMALE	HISPANIC	Human	stool	DADE
PNUSAS016201	SAMN07260212	Typhimurium	JPXX01.0033	19	1	76749	76749	5/24/17	61	MALE	NHISPANIC	Human	BLOOD	DUVAL
PNUSAS021447	SAMN07571929	Braenderup	JBPX01.0039	22	24	76767	76767	7/17/17	54	FEMALE	UNKNOWN	Human	URINE
PNUSAS017420	SAMN07352808	IV 6,7:g,z51:-|IV 11:g,z51:-|IV 18:g,z51:-|IV 21:g,z51:-|IV 38:g,z51:-|IV 1,40:g,z51:-|IV 1,42:g,z51:-|IV 43:g,z51:-|IV 44:g,z51:-|IV 45:g,z51:-|IV 48:g,z51:-|IV 50:g,z51:-|IV 1,53:g,z51:-		454	23	76790	76790	5/28/17	65	MALE	NHISPANIC	Human	BLOOD	BROWARD
PNUSAS016315	SAMN07269311	IV 6,7:g,z51:-|IV 11:g,z51:-|IV 18:g,z51:-|IV 21:g,z51:-|IV 38:g,z51:-|IV 1,40:g,z51:-|IV 1,42:g,z51:-|IV 43:g,z51:-|IV 44:g,z51:-|IV 45:g,z51:-|IV 48:g,z51:-|IV 50:g,z51:-|IV 1,53:g,z51:-		454	23	76790	76790	5/2/17	1	MALE	NHISPANIC	Human	stool	BROWARD
PNUSAS016314.b	NA	Muenchen		112	8	76846	76846	5/2/17	0	MALE	NHISPANIC	Human	stool	PUTNAM
PNUSAS042164	SAMN09379932	I 4,[5],12:i:-	JPXX01.4578	19	1	77151	77151	4/4/18	1	MALE	UNKNOWN	Human	stool	DADE
PNUSAS017426	SAMN07352816	Braenderup	JBPX01.0002	22	24	77548	77548	6/3/17	51	FEMALE	NHISPANIC	Human	stool	HERNANDO
PNUSAS016448	SAMN07342181	Sandiego	JLXX01.0713	126	12	77752	77752	3/31/17	70	FEMALE	NHISPANIC	Human	stool	INDIAN RIVER
PNUSAS016446	SAMN07514361	Sandiego	JLXX01.0713	126	12	77752	77752	3/31/17	1	FEMALE	UNKNOWN	Human	stool	LEE
PNUSAS016445	SAMN07342179	Sandiego	JLXX01.0713	126	12	77752	77752	3/31/17	67	MALE	NHISPANIC	Human	stool	ST. LUCIE
PNUSAS016447	SAMN07342180	Sandiego	JLXX01.0713	126	12	77752	77752	3/31/17	41	FEMALE	UNKNOWN	Human	stool	POLK
PNUSAS016443	SAMN07342177	Sandiego		126	12	77755	77755	3/29/17	0	MALE	NHISPANIC	Human	stool	NA
PNUSAS016444	SAMN07342178	Anatum	JAGX01.0453	64	65	77825	77825	3/29/17	0	FEMALE	NHISPANIC	Human	stool	NA
PNUSAS016441	SAMN07342176	Montevideo	JIXX01.0876	81	40	77856	77856	3/27/17	95	MALE	NHISPANIC	Human	stool	CALHOUN
PNUSAS016439	SAMN07342175	Enteritidis	JEGX01.0101	11	4	77868	77868	3/27/17	68	MALE	NHISPANIC	Human	stool	ST. LUCIE
PNUSAS016934	SAMN07342201	Newport	JJPX01	118	2	78115	78115	5/30/17	53	MALE	NHISPANIC	Human	stool	VOLUSIA
PNUSAS016926	SAMN07342197	IV 50:z4,z23:-		2053	301	78116	78116	5/26/17	0	MALE	HISPANIC	Human	stool	POLK
PNUSAS016935	SAMN07342202	Poona		447	46	78119	78119	5/31/17	0	FEMALE	NHISPANIC	Human	stool
PNUSAS016941	SAMN07342207	IV 50:z4,z23:-		2053	301	78120	78120	5/25/17	2	MALE	HISPANIC	Human		DADE
PNUSAS016944	SAMN07342210	Javiana	JGGX01.0012	24	17	78140	78140	6/9/17	0	FEMALE	NHISPANIC	Human	stool	DUVAL
PNUSAS016925	SAMN07342196	Abaetetuba		4074	NA	78149	78149	5/22/17	0	FEMALE	NHISPANIC	Human	stool	POLK
PNUSAS016947	SAMN07342212	Muenchen		112	8	78151	78151	6/2/17	52	FEMALE	NHISPANIC	Human	stool	DUVAL
PNUSAS016929	SAMN07342198	Muenchen	JJ6X01.0164	2870	8	78152	78152	5/8/17	1	MALE	NHISPANIC	Human	stool	POLK
PNUSAS016949	SAMN07342214	Mississippi	JIPX01.0013	448	80	78192	78192	6/12/17	2	FEMALE	NHISPANIC	Human	stool	NA
PNUSAS016930	SAMN07342199	Braenderup	JBPX01.0094	22	24	78193	78193	5/30/17	0	FEMALE	HISPANIC	Human	stool	ORANGE
PNUSAS016451	SAMN07342184	Newport	JJPX01.0438	118	2	78197	78197	4/4/17	74	FEMALE	UNKNOWN	Human	stool	PALM BEACH
PNUSAS016456	SAMN07342188	Saintpaul	JN6X01.0143	95	209	78204	78204	5/10/17	2	MALE	NHISPANIC	Human	stool	DUVAL
PNUSAS016463	SAMN07342194	Javiana	JGGX01.0036	24	17	78211	78211	5/12/17	62	FEMALE	UNKNOWN	Human	stool	LEE
PNUSAS016464	SAMN07342195	Javiana	JGGX01.0036	24	17	78211	78211	5/12/17	69	MALE	UNKNOWN	Human	stool
PNUSAS016459	SAMN07342191	Rubislaw	JLPX01.0059	94	133	78212	78212	5/11/17	32	MALE	NHISPANIC	Human	stool	POLK
PNUSAS016454	SAMN07342187	Sandiego	JLXX01.0588	126	12	78213	78213	5/9/17	18	MALE	UNKNOWN	Human	stool	LEE
PNUSAS016460	SAMN07342192	Javiana	JGGX01.0769	1674	17	78216	78216	5/11/17	64	MALE	UNKNOWN	Human	stool	HILLSBOROUGH
PNUSAS016461	SAMN07342193	IV 44:z4,z23:-		433	23	78217	78217	5/12/17	0	FEMALE	NHISPANIC	Human	stool	PASCO
PNUSAS016938	SAMN07342204	Charity		383	163	78220	78220	5/16/17	52	MALE	NHISPANIC	Human	stool	BROWARD
PNUSAS016452	SAMN07342185	Newport	JJPX01.0235	118	2	78224	78224	4/5/17	12	FEMALE	UNKNOWN	Human	stool	BREVARD
PNUSAS016453	SAMN07342186	IIIa 48:z4,z23,z32:-		3194	NA	78229	78229	4/28/17	0	FEMALE	NHISPANIC	Human	stool	ORANGE
PNUSAS052139	SAMN09990224	Typhimurium	JPXX01.0006	19	1	78259	78259	6/12/18	1	FEMALE	NHISPANIC	Human	stool	NASSAU
PNUSAS016946	SAMN07342211	IV 50:z4,z23:-		2053	301	78262	78262	6/5/17	74	FEMALE	NHISPANIC	Human	stool	NASSAU
PNUSAS016943	SAMN07342209	Typhimurium	JPXX01.3014	19	1	78287	78287	6/5/17	17	MALE	HISPANIC	Human	stool	ORANGE
PNUSAS018891	SAMN07414518	Stanley		29	29	78387	78387	6/19/17	58	FEMALE	NHISPANIC	Human	stool	HILLSBOROUGH
PNUSAS018346	SAMN07352338	Sandiego		126	12	78509	78509	4/30/17	12	MALE	UNKNOWN	Human	stool	HILLSBOROUGH
PNUSAS017037	SAMN07342231	Sandiego		126	12	78509	78509	5/1/17	0	FEMALE	NHISPANIC	Human	stool	ALACHUA
PNUSAS017035	SAMN07342229	Thompson	JP6X01.0001	26	28	78510	78510	5/1/17	55	MALE	UNKNOWN	Human	stool	LEE
PNUSAS017026	SAMN07342220	Montevideo	JIXX01.0525	81	40	78511	78511	6/12/17	1	FEMALE	NHISPANIC	Human	stool	NA
PNUSAS017038	SAMN07342232	I 1,4,[5],12:b:-	JKXX01.1129	1838	155	78540	78540	5/1/17	39	MALE	UNKNOWN	Human	stool	ST. LUCIE
PNUSAS017034	SAMN07342228	IV 50:z4,z23:-		2053	301	78552	78552	6/2/17	0	MALE	NHISPANIC	Human		PALM BEACH
PNUSAS017029	SAMN07342223	IV 50:z4,z23:-		2053	301	78555	78555	6/7/17	57	MALE	NHISPANIC	Human	stool	BROWARD
PNUSAS017025	SAMN07342219	Sandiego	JLXX01.0354	126	12	78557	78557	6/12/17	26	FEMALE	HISPANIC	Human	stool	DUVAL
PNUSAS017030	SAMN07342224	Javiana	JGGX01.0027	24	17	78558	78558	6/7/17	1	FEMALE	NHISPANIC	Human	stool	CLAY
PNUSAS017027	SAMN07342221	Paratyphi B var. Java	JKXX01.0101	88	19	78559	78559	6/12/17	26	MALE	NHISPANIC	Human	stool	NA
PNUSAS017032	SAMN07342226	Sandiego	JLXX01.0661	126	12	78560	78560	6/9/17	5	MALE	HISPANIC	Human	stool	COLLIER
PNUSAS017423	SAMN07352812	Reading		93	43	78604	78604	6/1/17	74	MALE	NHISPANIC	Human	stool	LAKE
PNUSAS017424	SAMN07352813	IV 6,7:g,z51:-|IV 11:g,z51:-|IV 18:g,z51:-|IV 21:g,z51:-|IV 38:g,z51:-|IV 1,40:g,z51:-|IV 1,42:g,z51:-|IV 43:g,z51:-|IV 44:g,z51:-|IV 45:g,z51:-|IV 48:g,z51:-|IV 50:g,z51:-|IV 1,53:g,z51:-		454	23	78605	78605	5/19/17	0	MALE	HISPANIC	Human	stool	BROWARD
PNUSAS038664	SAMN08930245	Enteritidis	JLXX01.0813	11	4	78610	78610	2/5/18	3	MALE	NHISPANIC	Human	stool	BROWARD
PNUSAS017437	SAMN07352825	I 4,[5],12:i:-	JPXX01.1314	34	1	78627	78627	5/26/17	15	MALE	NHISPANIC	Human	stool	BROWARD
PNUSAS017428	SAMN07352817	Sandiego	JLXX01.0759	126	12	78632	78632	6/2/17	0	MALE	HISPANIC	Human	stool	COLLIER
PNUSAS017697	SAMN07352380	Baildon		2166	399	78633	78633	6/15/17	59	MALE	NHISPANIC	Human	stool	DUVAL
PNUSAS017693	SAMN07352376	Javiana	JGGX01.0488	24	17	78635	78635	6/14/17	15	FEMALE	NHISPANIC	Human	stool
PNUSAS016932	SAMN07352811	Sandiego		126	12	78637	78637	6/1/17	0	FEMALE	NHISPANIC	Human	stool	OSCEOLA
PNUSAS017041	SAMN07352790	Newport	JJPX01.0588	118	2	78656	78656	5/9/17	65	MALE	NHISPANIC	Human	stool	SARASOTA
PNUSAS026546	SAMN07795648	Mississippi	JIPX01.0510	356	80	78658	78658	4/20/17	1	MALE	NHISPANIC	Human	stool	WALTON
PNUSAS017050	SAMN07352799	Mississippi		356	80	78658	78658	5/5/17	0	FEMALE	UNKNOWN	Human	stool	WALTON
PNUSAS017438	SAMN07352826	Typhimurium	JPXX01.0283	19	1	78660	78660	5/25/17	68	MALE	UNKNOWN	Human	stool	JACKSON
PNUSAS017694	SAMN07352377	Bareilly		2129	233	78661	78661	6/14/17	73	FEMALE	NHISPANIC	Human	stool	VOLUSIA
PNUSAS017691	SAMN07352374	Poona		447	46	78663	78663	6/13/17	62	MALE	HISPANIC	Human	stool
PNUSAS017434	SAMN07352822	Rubislaw	JLPX01.0059	94	133	78664	78664	5/31/17	79	FEMALE	NHISPANIC	Human	stool	PINELLAS
PNUSAS016945	SAMN07352827	Typhimurium	JPXX01.0003	19	1	78665	78665	6/5/17	12	MALE	NHISPANIC	Human	stool	PASCO
PNUSAS017698	SAMN07352381	Typhimurium	JPXX01.1620	19	1	78667	78667	6/3/17	56	MALE	UNKNOWN	Human	BLOOD	NA
PNUSAS017439	SAMN07352828	IV 48:z4,z32:-		2058	23	78669	78669	6/9/17	0	FEMALE	UNKNOWN	Human
PNUSAS017430	SAMN07352818	Newport	JJPX01.0094	5	2	78670	78670	6/2/17	75	MALE	NHISPANIC	Human	stool	NA
PNUSAS017690	SAMN07352373	Rubislaw		1575	204	78671	78671	6/12/17	0	MALE	NHISPANIC	Human	stool	PALM BEACH
PNUSAS017696	SAMN07352379	Montevideo	JIXX01.1259	81	40	78677	78677	5/10/17	64	MALE	UNKNOWN	Human	stool	LEON
PNUSAS017033	SAMN07342227	Miami		80	111	78680	78680	5/31/17	64	FEMALE	NHISPANIC	Human	BLOOD	MARION
PNUSAS035565	SAMN08774347	Enteritidis	JEGX01.0004	11	4	78681	113955	11/30/17	9	FEMALE	UNKNOWN	Human	stool
PNUSAS016438	SAMN07352829	Enteritidis	JEGX01.0004	11	4	78681	78681	3/15/17	9	FEMALE	UNKNOWN	Human	stool	SARASOTA
PNUSAS016939	SAMN07352814	Sandiego	JLXX01.0121	126	12	78683	78683	6/1/17	0	FEMALE	NHISPANIC	Human	stool	ST. LUCIE
PNUSAS017043	SAMN07352792	Enteritidis	JEGX01.0953	11	4	78698	78698	5/12/17	22	MALE	UNKNOWN	Human	stool	ORANGE
PNUSAS018342	SAMN07352334	Schwarzengrund	JM6X01.0288	96	33	78700	78700	4/27/17	58	FEMALE	UNKNOWN	Human	stool	BREVARD
PNUSAS017642	SAMN07414532	Paratyphi B var. Java	JKXX01.0014	127	19	78701	80769	4/7/17	0	FEMALE	NHISPANIC	Human	stool	SARASOTA
PNUSAS017042	SAMN07352791	Paratyphi B var. Java	JKXX01.0014	127	19	78701	78701	5/12/17	0	FEMALE	NHISPANIC	Human	stool	SARASOTA
PNUSAS017040	SAMN07352789	Muenchen		112	8	78702	78702	5/2/17	36	MALE	UNKNOWN	Human	stool	NA
PNUSAS017702	SAMN07352385	IV 45:g,z51:-		107	404	78703	78703	6/17/17	0	FEMALE	NHISPANIC	Human	stool	BROWARD
PNUSAS017053	SAMN07352802	Javiana	JGGX01.0016	24	17	78716	78716	5/6/17	7	MALE	UNKNOWN	Human	stool	BREVARD
PNUSAS017433	SAMN07352821	Newport	JJPX01.0438	118	2	78724	78724	6/2/17	88	FEMALE	NHISPANIC	Human	URINE	ST. JOHNS
PNUSAS017048	SAMN07352797	Litchfield		214	61	78734	78734	5/16/17	56	FEMALE	UNKNOWN	Human	stool	COLUMBIA
PNUSAS016455	SAMN07352830	Newport	JJPX01.0869	118	2	78735	78735	5/9/17	4	FEMALE	NHISPANIC	Human	stool	BAY
PNUSAS018351	SAMN07352343	Braenderup	JBPX01.0002	22	24	78921	78921	5/16/17	47	FEMALE	NHISPANIC	Human	stool	CHARLOTTE
PNUSAS018363	SAMN07352354	Newport	JJPX01.0484	5	2	78925	78925	5/16/17	1	MALE	NHISPANIC	Human	stool	ESCAMBIA
PNUSAS018359	SAMN07352350	Miami		80	111	78969	78969	5/23/17	72	FEMALE	NHISPANIC	Human	stool	HILLSBOROUGH
PNUSAS018353	SAMN07352345	Sandiego		126	12	78971	78971	5/15/17	5	MALE	HISPANIC	Human	stool	BROWARD
PNUSAS018354	SAMN07352346	Urbana		754	38	78972	78972	5/1/17	0	FEMALE	NHISPANIC	Human	stool	LEVY
PNUSAS017052	SAMN07352801	Give		654	239	78974	78974	5/5/17	51	FEMALE	NHISPANIC	Human	stool	NA
PNUSAS017418	SAMN07352806	Newport	JJPX01.0011	31	7	78975	78975	5/29/17	2	FEMALE	NHISPANIC	Human	stool	DUVAL
PNUSAS017665	SAMN07436208	Infantis	JFXX01.1091	32	31	79462	92851	4/14/17	1	FEMALE	NHISPANIC	Human	stool	ORANGE
PNUSAS020196	SAMN07436258	Enteritidis	JEGX01.0004	11	4	79486	85652	6/28/17	1	MALE	NHISPANIC	Human	stool	DADE
PNUSAS020197	SAMN07436259	Enteritidis	JEGX01.0004	11	4	79486	85652	7/3/17	34	FEMALE	NHISPANIC	Human	stool	BROWARD
PNUSAS038706	SAMN08955960	Infantis	JFXX01.0011	32	31	79553	79553	9/22/17	26	MALE	UNKNOWN	Human	stool	HIGHLANDS
PNUSAS018862	SAMN07361181	Miami		80	111	79597	79597	6/18/17	67	FEMALE	NHISPANIC	Human	URINE	CHARLOTTE
PNUSAS018864	SAMN07361183	Rubislaw	JLPX01.0052	94	133	79598	79598	6/15/17	62	FEMALE	NHISPANIC	Human	URINE	PASCO
PNUSAS018856	SAMN07361175	Typhimurium	JPXX01.1996	19	1	79599	79599	6/19/17	5	FEMALE	NHISPANIC	Human	stool	BREVARD
PNUSAS018881	SAMN07361197	Saintpaul	JN6X01.0030	95	209	79600	79600	6/26/17	48	MALE	NHISPANIC	Human	stool	GILCHRIST
PNUSAS017435	SAMN07352823	IV 50:z4,z23:-		2053	301	79601	79601	6/3/17	8	MALE	NHISPANIC	Human	stool	PALM BEACH
PNUSAS018853	SAMN07361173	IV 48:z4,z32:-		2058	23	79603	79603	6/21/17	0	FEMALE	HISPANIC	Human	stool	DADE
PNUSAS018876	SAMN07361192	Typhimurium	JPXX01.0324	19	1	79613	79613	6/24/17	0	MALE	NHISPANIC	Human		OKALOOSA
PNUSAS018883	SAMN07361199	Newport	JJPX01.0588	118	2	79614	79614	6/29/17	0	FEMALE	NHISPANIC	Human	stool	BREVARD
PNUSAS018880	SAMN07361196	Braenderup	JBPX01.0089	22	24	79615	79615	6/30/17	1	FEMALE	NHISPANIC	Human	stool	BREVARD
PNUSAS018878	SAMN07361194	IV 48:g,z51:-		1869	23	79619	79619	6/16/17	0	FEMALE	HISPANIC	Human		DADE
PNUSAS018338	SAMN07352330	Newport	JJPX01.0588	118	2	79621	79621	4/26/17	0	FEMALE	NHISPANIC	Human	stool	SARASOTA
PNUSAS018863	SAMN07361182	Rubislaw	JLPX01.0059	94	133	79622	79622	6/19/17	0	FEMALE	NHISPANIC	Human	URINE
PNUSAS018867	SAMN07361185	Baildon		2166	399	79623	79623	6/25/17	31	MALE	NHISPANIC	Human	stool	PALM BEACH
PNUSAS018858	SAMN07361177	Saintpaul	JN6X01.0492	95	209	79626	79626	6/24/17	85	FEMALE	NHISPANIC	Human	stool	FLAGLER
PNUSAS017655	SAMN07370934	Paratyphi B var. Java	JKXX01.0031	88	19	79632	79632	4/11/17	69	MALE	NHISPANIC	Human	stool	PASCO
PNUSAS017654	SAMN07370933	Paratyphi B var. Java	JKXX01.0031	88	19	79632	79632	4/11/17	34	FEMALE	NHISPANIC	Human	stool	LEE
PNUSAS018857	SAMN07361176	Agbeni	JRFX01.0003	2009	292	79633	79633	6/19/17	6	MALE	NHISPANIC	Human	stool	BREVARD
PNUSAS018860	SAMN07361179	Oranienburg	JJXX01.0001	23	41	79634	79634	6/8/17	47	FEMALE	NHISPANIC	Human	stool	PASCO
PNUSAS030383	SAMN08294544	Gaminara	JIXX01.0698	239	245	79638	79638	10/31/17	4	MALE	NHISPANIC	Human	stool	HILLSBOROUGH
PNUSAS018882	SAMN07361198	Hartford	JHAX01	405	169	79643	79643	7/2/17	77	FEMALE	NHISPANIC	Human	stool	LEE
PNUSAS022592	SAMN07611388	Amager		293	286	79646	87003	5/27/17	1	MALE	HISPANIC	Human	stool	BROWARD
PNUSAS017657	SAMN07370935	Amager		293	286	79646	79646	4/13/17	30	MALE	UNKNOWN	Human	stool	POLK
PNUSAS018855	SAMN07361174	Braenderup	JBPX01.0002	22	24	79647	79647	6/19/17	0	MALE	HISPANIC	Human	stool	BREVARD
PNUSAS018877	SAMN07361193	Typhimurium	JPXX01.0324	19	1	79650	79650	6/23/17	3	FEMALE	NHISPANIC	Human		OKALOOSA
PNUSAS018879	SAMN07361195	Javiana	JGGX01.0094	24	17	79651	79651	6/29/17	15	FEMALE	NHISPANIC	Human	stool	SUWANNEE
PNUSAS017668	SAMN07370938	Typhi	JPPX01.0919	1	13	79665	79665	4/17/17	3	MALE	NHISPANIC	Human	stool	MARION
PNUSAS018859	SAMN07361178	Typhimurium		19	1	79672	79672	6/19/17	63	FEMALE	NHISPANIC	Human	stool	BREVARD
PNUSAS017650	SAMN07370931	Berta	JAXX01.0002	435	99	79674	79674	4/11/17	66	FEMALE	UNKNOWN	Human	stool	ORANGE
PNUSAS017652	SAMN07370932	Berta	JAXX01.0002	435	99	79674	79674	4/10/17	30	FEMALE	NHISPANIC	Human	stool	POLK
PNUSAS017643	SAMN07370924	Baildon	TDEX01.0002	2166	399	79675	79675	4/6/17	14	MALE	UNKNOWN	Human	stool	LEE
PNUSAS018872	SAMN07361190	IV 50:z4,z23:-		2053	301	79676	79676	6/23/17	0	FEMALE	NHISPANIC	Human	stool	POLK
PNUSAS017648	SAMN07370928	Braenderup	JBPX01.0002	22	24	79701	79701	4/8/17	22	FEMALE	NHISPANIC	Human	stool	ORANGE
PNUSAS018340	SAMN07352332	Rubislaw	JAAX01	1575	204	79703	79703	4/27/17	1	FEMALE	NHISPANIC	Human	stool	CLAY
PNUSAS017425	SAMN07352815	IV 48:z4,z32:-		2058	23	79722	79722	5/17/17	0	MALE	NHISPANIC	Human	stool	PALM BEACH
PNUSAS017658	SAMN07370936	Javiana	JGGX01.1268	24	17	79753	79753	4/13/17	38	MALE	NHISPANIC	Human	stool	GULF
PNUSAS017649	SAMN07370930	I 1,4,[5],12:b:-	JKXX01.1129	1838	155	79802	79802	4/11/17	2	FEMALE	UNKNOWN	Human	stool	ORANGE
PNUSAS018868	SAMN07361186	IV 50:z4,z23:-		2053	301	79818	79818	6/24/17	0	MALE	HISPANIC	Human	stool	PASCO
PNUSAS043547	SAMN09430450	Enteritidis	JEGX01.0004	11	4	79928	79928	3/28/18	5	FEMALE	HISPANIC	Human	stool	ORANGE
PNUSAS017673	SAMN07352357	IV 44:z4,z23:-		433	23	80288	80288	6/10/17	74	MALE	NHISPANIC	Human	stool	PALM BEACH
PNUSAS017675	SAMN07352359	Albany		292	45	80291	80291	6/14/17	51	MALE	NHISPANIC	Human	stool	ST. JOHNS
PNUSAS017677	SAMN07352361	IV 1,40:z4,z24:-		2868	419	80299	80299	6/5/17	0	FEMALE	NHISPANIC	Human	stool	MONROE
PNUSAS017686	SAMN07352370	IV 48:z4,z32:-		2058	23	80322	80322	6/14/17	0	FEMALE	NHISPANIC	Human	stool	PALM BEACH
PNUSAS017678	SAMN07352362	Sandiego	JLXX01.0354	126	12	80382	80382	6/10/17	21	FEMALE	NHISPANIC	Human	stool	DUVAL
PNUSAS017672	SAMN07352356	Newport	JJPX01.5082	118	2	80683	80683	6/6/17	0	MALE	NHISPANIC	Human	stool	BREVARD
PNUSAS018885	SAMN07414513	IV 50:z4,z23:-		2053	301	80688	80688	6/1/17	0	FEMALE	NHISPANIC	Human	BLOOD	DUVAL
PNUSAS017680	SAMN07352364	Newport	JJPX01.0095	5	2	80690	80690	6/10/17	34	FEMALE	NHISPANIC	Human	stool	DUVAL
PNUSAS018889	SAMN07414516	Javiana	JGGX01.0092	24	17	80696	80696	6/11/17	2	MALE	NHISPANIC	Human	stool	LEVY
PNUSAS018895	SAMN07414522	Javiana	JGGX01.0110	24	17	80701	80701	6/27/17	55	FEMALE	NHISPANIC	Human	stool	CLAY
PNUSAS018903	SAMN07414530	Infantis	JFXX01.1230	32	31	80702	80702	6/16/17	0	FEMALE	NHISPANIC	Human		LEON
PNUSAS017674	SAMN07352358	Anatum	JAGX01.0217	64	65	80703	80703	6/4/17	48	FEMALE	NHISPANIC	Human	stool	BREVARD
PNUSAS017682	SAMN07352366	Sandiego	JLXX01.0758	126	12	80704	80704	6/12/17	6	FEMALE	NHISPANIC	Human	stool	BROWARD
PNUSAS017679	SAMN07352363	Hartford		3851	169	80714	80714	6/8/17	0	FEMALE	NHISPANIC	Human	stool	ST. LUCIE
PNUSAS018886	SAMN07414514	Muenchen	JJ6X01.0154	83	248	80716	80716	6/9/17	0	FEMALE	HISPANIC	Human	stool	POLK
PNUSAS018312	SAMN07414511	Monschaui		443	277	80717	80717	6/14/17	6	FEMALE	HISPANIC	Human	stool	DADE
PNUSAS018313	SAMN07414512	Poona	JL6X01.0936	964	315	80718	80718	6/16/17	2	MALE	NHISPANIC	Human	stool	BROWARD
PNUSAS018320	SAMN07414499	Braenderup	JBPX01.0002	22	24	80726	80726	5/25/17	44	FEMALE	HISPANIC	Human	stool	PALM BEACH
PNUSAS018317	SAMN07414496	Thompson	JP6X01.0022	26	28	80727	80727	5/20/17	4	FEMALE	UNKNOWN	Human	stool	BROWARD
PNUSAS018318	SAMN07414497	Muenchen	JJ6X01.1056	2870	8	80730	80730	5/23/17	1	MALE	NHISPANIC	Human	stool	MARTIN
PNUSAS018311	SAMN07414510	IV 50:z4,z23:-		2053	301	80731	80731	6/19/17	0	FEMALE	HISPANIC	Human	stool	DADE
PNUSAS018324	SAMN07414502	Braenderup	JBPX01.0516	22	24	80732	80732	6/7/17	8	MALE	HISPANIC	Human	stool	PALM BEACH
PNUSAS018307	SAMN07414509	Javiana	JGGX01.0012	24	17	80736	80736	6/19/17	36	MALE	NHISPANIC	Human	stool	FLAGLER
PNUSAS019564	SAMN07519145	Javiana	JGGX01.0036	24	17	80744	83693	7/10/17	0	FEMALE	NHISPANIC	Human	stool	DUVAL
PNUSAS018892	SAMN07414519	Javiana	JGGX01.0036	24	17	80744	80744	6/27/17	5	MALE	NHISPANIC	Human	stool	DUVAL
PNUSAS018898	SAMN07414525	Montevideo	JIXX01.1114	81	40	80754	80754	6/23/17	75	FEMALE	NHISPANIC	Human	stool	NA
PNUSAS018897	SAMN07414524	Sandiego	JLXX01.0354	126	12	80755	80755	6/22/17	82	FEMALE	NHISPANIC	Human	stool	DUVAL
PNUSAS017687	SAMN07352371	Sandiego		126	12	80756	80756	6/12/17	81	MALE	NHISPANIC	Human	stool	BROWARD
PNUSAS018896	SAMN07414523	IV 48:z4,z32:-		2058	23	80758	80758	6/17/17	0	FEMALE	HISPANIC	Human	stool	DADE
PNUSAS017700	SAMN07352383	Typhimurium	JPXX01.0923	19	1	80759	80759	6/18/17	2	FEMALE	NHISPANIC	Human	stool	BREVARD
PNUSAS018322	SAMN07414501	IV 1,40:z4,z24:-		2868	419	80763	80763	6/26/17	63	MALE	HISPANIC	Human	stool	DADE
PNUSAS017669	SAMN07414539	IV 50:z4,z23:-		2053	301	80768	80768	4/14/17	0	FEMALE	NHISPANIC	Human	stool	ORANGE
PNUSAS017653	SAMN07414534	Muenchen	JJ6X01.1754	2870	8	80770	80770	4/12/17	1	MALE	NHISPANIC	Human	stool	ST. LUCIE
PNUSAS017660	SAMN07414535	Rubislaw	JLPX01.0363	94	133	80772	80772	4/14/17	57	FEMALE	NHISPANIC	Human	stool	SANTA ROSA
PNUSAS018890	SAMN07414517	Typhimurium	JPXX01.1416	19	1	80813	80813	6/6/17	34	FEMALE	NHISPANIC	Human	stool	BREVARD
PNUSAS017666	SAMN07414538	Kiambu		309	249	80815	80815	4/16/17	1	MALE	UNKNOWN	Human	stool	BREVARD
PNUSAS017664	SAMN07414537	Anatum	JAGX01.0033	64	65	80816	80816	4/17/17	0	MALE	NHISPANIC	Human	stool	MARION
PNUSAS018319	SAMN07414498	Hvittingfoss		446	259	80817	80817	5/25/17	3	MALE	HISPANIC	Human	stool	COLLIER
PNUSAS018901	SAMN07414528	Javiana	JGGX01.0012	24	17	80818	80818	6/23/17	0	MALE	NHISPANIC	Human		LEON
PNUSAS018894	SAMN07414521	Saintpaul	JN6X01.0124	95	209	80819	80819	6/22/17	84	MALE	NHISPANIC	Human	stool	GILCHRIST
PNUSAS017670	SAMN07414540	IIIb 61:l,v:1,5,7:[z57]		243	10	80843	80843	4/18/17	84	FEMALE	NHISPANIC	Human	stool	DUVAL
PNUSAS017688	SAMN07414505	Hvittingfoss		434	173	80981	80981	6/16/17	4	FEMALE	HISPANIC	Human	stool	COLLIER
PNUSAS018893	SAMN07414520	IV 48:g,z51:-		433	23	81049	81049	6/17/17	25	MALE	HISPANIC	Human	stool	DADE
PNUSAS018902	SAMN07414529	Muenchen	JJ6X01.0484	112	8	81158	81158	6/16/17	3	MALE	HISPANIC	Human		GADSDEN
PNUSAS016435	SAMN07436216	Sandiego		126	12	81274	81274	3/15/17	28	FEMALE	UNKNOWN	Human	stool	DUVAL
PNUSAS048858	SAMN09761626	Enteritidis	JEGX01.0021	11	4	81482	81482	5/15/18	66	MALE	HISPANIC	Human	BLOOD	DADE
PNUSAS020169	SAMN07436232	IV 50:z4,z23:-		2053	301	81566	81566	6/14/17	9	FEMALE	NHISPANIC	Human	stool	LEE
PNUSAS020168	SAMN07436231	Muenchen	JJ6X01.0214	112	8	81579	81579	6/7/17	0	MALE	NHISPANIC	Human	stool	ORANGE
PNUSAS017421	SAMN07436214	Stanley		29	29	81580	81580	5/24/17	23	MALE	NHISPANIC	Human		LEON
PNUSAS017661	SAMN07469465	Newport	JJPX01.0438	118	2	81593	81593	4/17/17	46	MALE	UNKNOWN	Human	stool	BREVARD
PNUSAS020192	SAMN07436255	IV 44:z4,z23:-		433	23	81596	81596	7/4/17	0	FEMALE	NHISPANIC	Human	BLOOD	PINELLAS
PNUSAS019043	SAMN07436588	Braenderup	JBPX01.0492	22	24	81598	81598	6/30/17	51	MALE	HISPANIC	Human	stool	PALM BEACH
PNUSAS016436	SAMN07436217	Muenchen		112	8	81623	81623	3/15/17	1	MALE	UNKNOWN	Human	stool	PINELLAS
PNUSAS020687	SAMN07487371	Urbana		754	38	81642	81642	7/11/17	0	FEMALE	HISPANIC	Human		BROWARD
PNUSAS020172	SAMN07436235	Agbeni	JRFX01.0009	2606	292	81837	81837	6/13/17	24	FEMALE	HISPANIC	Human	BLOOD	COLLIER
PNUSAS020178	SAMN07436241	IV 50:z4,z23:-		2053	301	81838	81838	6/15/17	0	MALE	NHISPANIC	Human	stool	PALM BEACH
PNUSAS017662	SAMN07436209	Hartford		4154	169	81851	81851	4/17/17	3	FEMALE	NHISPANIC	Human	stool	OSCEOLA
PNUSAS020187	SAMN07436250	Paratyphi B var. Java	JKXX01.0014	127	19	81852	81852	7/8/17	3	MALE	NHISPANIC	Human	stool	BROWARD
PNUSAS019040	SAMN07436590	Sandiego		126	12	81854	81854	6/23/17	72	FEMALE	NHISPANIC	Human		VOLUSIA
PNUSAS018331	SAMN07436594	Montevideo	JIXX01.0140	1531	40	81876	81876	6/5/17	2	FEMALE	HISPANIC	Human	stool	BROWARD
PNUSAS016462	SAMN07436220	Litchfield		214	61	81877	81877	4/27/17	0	FEMALE	HISPANIC	Human	stool	INDIAN RIVER
PNUSAS019039	SAMN07436589	Sandiego	JLXX01.0757	126	12	81878	81878	6/28/17	76	MALE	NHISPANIC	Human	stool	DUVAL
PNUSAS020185	SAMN07436248	Newport	JJPX01.0384	118	2	81879	81879	7/10/17	25	MALE	NHISPANIC	Human	stool	CLAY
PNUSAS018330	SAMN07414507	Enteritidis	JEGX01.0031	11	4	81880	81880	6/5/17	2	MALE	NHISPANIC	Human	stool	BROWARD
PNUSAS020686	SAMN07487370	IV 50:z4,z23:-		2053	301	81887	81887	7/5/17	0	FEMALE	NHISPANIC	Human	stool	DUVAL
PNUSAS020690	SAMN07487374	Paratyphi B var. Java	JKXX01.0014	127	19	81945	81945	7/14/17	12	FEMALE	NHISPANIC	Human
PNUSAS020691	SAMN07487375	Sendai		80	111	81998	81998	7/17/17	74	MALE	HISPANIC	Human	stool	PALM BEACH
PNUSAS019045	SAMN07436597	Sandiego	JLXX01.0354	126	12	82248	154777	6/27/17	56	FEMALE	NHISPANIC	Human	URINE	DUVAL
PNUSAS018360	SAMN07352351	Inverness		1384	246	82253	82253	5/16/17	69	FEMALE	NHISPANIC	Human	stool	ORANGE
PNUSAS019044	SAMN07436591	Oranienburg	JJXX01.0024	1675	41	82267	82267	6/20/17	47	MALE	NHISPANIC	Human	BLOOD	MARION
PNUSAS019578	SAMN07519159	IV 48:g,z51:-		433	23	82268	83653	6/30/17	1	MALE	HISPANIC	Human		DADE
PNUSAS020190	SAMN07436253	IV 48:g,z51:-		433	23	82268	82268	6/30/17	1	FEMALE	NHISPANIC	Human	stool	DADE
PNUSAS020191	SAMN07436254	IV 48:g,z51:-		433	23	82268	82281	7/5/17	75	FEMALE	HISPANIC	Human	BLOOD	BROWARD
PNUSAS040583	SAMN09206714	IV 48:g,z51:-		433	23	82268	82268	3/26/18	1	FEMALE	NHISPANIC	Human	stool	PALM BEACH
PNUSAS040590	SAMN09489688	IV 48:g,z51:-		433	23	82268	130895	3/29/18	0	MALE	HISPANIC	Human	stool	BROWARD
PNUSAS020179	SAMN07436242	Gaminara		239	245	82269	82269	6/9/17	1	MALE	HISPANIC	Human	stool	DADE
PNUSAS020194	SAMN07436256	Urbana	JLXX01.0527	754	38	82270	82270	7/8/17	0	FEMALE	HISPANIC	Human	BLOOD	MARTIN
PNUSAS018888	SAMN07440985	Urbana		754	38	82270	82270	6/8/17	16	FEMALE	HISPANIC	Human	stool	BROWARD
PNUSAS020170	SAMN07436233	Saintpaul	JN6X01.0024	95	209	82271	82271	6/12/17	75	FEMALE	UNKNOWN	Human	stool	PUTNAM
PNUSAS020183	SAMN07436246	Javiana	JGGX01.0017	24	17	82282	82282	6/27/17	1	MALE	NHISPANIC	Human	stool	NASSAU
PNUSAS018308	SAMN07436207	Poona		964	315	82283	82283	6/9/17	0	FEMALE	UNKNOWN	Human	stool	LEON
PNUSAS020174	SAMN07436237	Newport	JJPX01.0438	118	2	82284	82284	6/11/17	68	FEMALE	NHISPANIC	Human	BLOOD	ORANGE
PNUSAS018309	SAMN07436593	Baildon		2166	399	82294	82294	6/14/17	1	MALE	UNKNOWN	Human	stool	DADE
PNUSAS017647	SAMN07436211	Johannesburg		512	38	82296	82296	4/9/17	0	FEMALE	NHISPANIC	Human	stool	SEMINOLE
PNUSAS017422	SAMN07436215	Infantis	JFXX01.1286	32	31	82298	82298	5/27/17	88	FEMALE	NHISPANIC	Human	URINE	PINELLAS
PNUSAS017432	SAMN07352820	IV 50:z4,z23:-		2053	301	82344	82344	5/24/17	2	FEMALE	UNKNOWN	Human		DADE
PNUSAS017676	SAMN07352360	IIIb 50:l,v:z35		4170	220	82349	82349	6/6/17	0	FEMALE	NHISPANIC	Human	stool	COLLIER
PNUSAS018310	SAMN07440986	IV 50:z4,z23:-		2053	301	82363	82363	6/12/17	0	MALE	UNKNOWN	Human	stool	PALM BEACH
PNUSAS018350	SAMN07352342	Muenchen		112	8	82512	82512	5/8/17	52	FEMALE	NHISPANIC	Human	stool	MANATEE
PNUSAS017055	SAMN07352804	Muenchen		112	8	82512	82512	5/7/17	0	FEMALE	NHISPANIC	Human	stool	ST. JOHNS
PNUSAS014760	SAMN07514360	Sandiego		126	12	83047	83047	3/8/17	0	MALE	NHISPANIC	Human	stool	DADE
PNUSAS018314	SAMN07440987	Bovismorbificans		150	289	83080	83080	5/18/17	2	MALE	NHISPANIC	Human	stool	BROWARD
PNUSAS020195	SAMN07436257	Stanley		29	29	83082	83082	6/30/17	2	FEMALE	NHISPANIC	Human	stool	DADE
PNUSAS030152	SAMN08211516	Reading		93	43	83142	105221	11/2/17	4	FEMALE	HISPANIC	Human	stool	PALM BEACH
PNUSAS020167	SAMN07436230	Montevideo		81	40	83143	83143	6/11/17	32	FEMALE	NHISPANIC	Human	stool	BAY
PNUSAS020175	SAMN07436238	IV 50:z4,z23:-		2053	301	83155	83155	6/9/17	0	MALE	NHISPANIC	Human		PALM BEACH
PNUSAS020166	SAMN07436229	Newport	JJPX01.2696	118	2	83156	83156	6/14/17	65	FEMALE	NHISPANIC	Human	stool	CITRUS
PNUSAS017429	SAMN07436212	Agona	JABX01.0533	13	54	83157	83157	5/31/17	26	MALE	NHISPANIC	Human	stool	MARTIN
PNUSAS018899	SAMN07414526	Newport	JJPX01.0438	118	2	83162	83162	6/24/17	61	FEMALE	NHISPANIC	Human	stool	ST. LUCIE
PNUSAS048861	SAMN09761641	Typhimurium	JPXX01.1710	19	1	83303	83303	5/11/18	0	MALE	NHISPANIC	Human	stool	DADE
PNUSAS019568	SAMN07519149	Rubislaw	JLPX01.0059	94	133	83655	83655	6/26/17	2	FEMALE	NHISPANIC	Human	stool	OSCEOLA
PNUSAS019571	SAMN07519152	Mississippi	JIPX01.0629	448	80	83656	83656	7/6/17	26	MALE	HISPANIC	Human	stool	DUVAL
PNUSAS019583	SAMN07519164	IV 50:z4,z23:-		2053	301	83658	83658	6/28/17	0	MALE	UNKNOWN	Human	stool	PALM BEACH
PNUSAS019584	SAMN07519165	Braenderup	JBPX01.0253	22	24	83659	83659	7/6/17	52	MALE	NHISPANIC	Human	stool	COLUMBIA
PNUSAS019581	SAMN07519162	Newport	JJPX01.0429	5	2	83660	83660	7/8/17	44	FEMALE	NHISPANIC	Human	stool	WAKULLA
PNUSAS019566	SAMN07519147	Rubislaw	JLPX01.0059	94	133	83661	83661	6/12/17	0	MALE	HISPANIC	Human	stool	ORANGE
PNUSAS019585	SAMN07519166	Muenchen	JJ6X01.2010	4195	8	83668	83668	7/9/17	70	FEMALE	HISPANIC	Human	stool	BROWARD
PNUSAS019560	SAMN07519141	Saintpaul	JN6X01.0143	95	209	83669	83669	7/3/17	3	FEMALE	NHISPANIC	Human	stool	CLAY
PNUSAS019563	SAMN07519144	IV 50:z4,z23:-		2053	301	83674	83674	7/2/17	0	FEMALE	NHISPANIC	Human	stool	ST. JOHNS
PNUSAS019559	SAMN07519140	Enteritidis	JEGX01.0004	11	4	83675	83675	7/5/17	25	MALE	NHISPANIC	Human	stool	DUVAL
PNUSAS019562	SAMN07519143	Miami		4198	111	83686	83686	6/30/17	79	MALE	NHISPANIC	Human	stool	BAY
PNUSAS019575	SAMN07519156	IV 48:z4,z32:-		2058	23	83690	83690	6/20/17	0	FEMALE	NHISPANIC	Human		DADE
PNUSAS019570	SAMN07519151	Rubislaw	JIXX01.0027	94	133	83691	83691	7/6/17	59	MALE	NHISPANIC	Human	stool	LAKE
PNUSAS019561	SAMN07519142	Sandiego		126	12	83692	83692	6/27/17	81	FEMALE	NHISPANIC	Human	stool	ORANGE
PNUSAS019580	SAMN07519161	Braenderup	JBPX01.0472	22	24	83715	83715	7/8/17	87	FEMALE	NHISPANIC	Human	stool	PINELLAS
PNUSAS019582	SAMN07519163	IV 50:z4,z23:-		2053	301	83716	83716	6/30/17	0	MALE	NHISPANIC	Human	stool	HILLSBOROUGH
PNUSAS019573	SAMN07519154	Sandiego		126	12	83717	83717	7/3/17	8	MALE	NHISPANIC	Human	stool
PNUSAS019576	SAMN07519157	IV 48:g,z51:-		433	23	83776	83776	6/26/17	0	FEMALE	NHISPANIC	Human		DADE
PNUSAS019565	SAMN07519146	Muenchen		112	8	83777	83777	7/3/17	58	MALE	NHISPANIC	Human	stool	WAKULLA
PNUSAS019577	SAMN07519158	IV 48:z4,z32:-		2058	23	83783	83783	6/30/17	6	MALE	HISPANIC	Human		DADE
PNUSAS019567	SAMN07519148	Agona	JABX01.0059	13	54	84032	84032	6/16/17	3	FEMALE	HISPANIC	Human	stool	OSCEOLA
PNUSAS040577	SAMN09197807	Typhimurium	JPXX01.0018	19	1	84137	120564	3/18/18	8	MALE	NHISPANIC	Human	stool	DADE
PNUSAS019572	SAMN07519153	Paratyphi B var. Java		88	19	84316	84316	7/4/17	2	FEMALE	NHISPANIC	Human	stool	POLK
PNUSAS021435	SAMN07568809	Javiana	JGGX01.0012	24	17	84728	84728	7/7/17	92	FEMALE	NHISPANIC	Human	URINE	LEON
PNUSAS021425	SAMN07572935	Sandiego	JJPX01.0041	126	12	84753	84753	7/14/17	2	MALE	NHISPANIC	Human	BLOOD	DUVAL
PNUSAS017427	SAMN07436213	Pensacola		2361	409	84804	84804	6/1/17	51	FEMALE	NHISPANIC	Human	stool	PUTNAM
PNUSAS021422	SAMN07568804	Newport	JJPX01.0538	45	3	85563	85563	6/27/17	10	FEMALE	NHISPANIC	Human	stool	BROWARD
PNUSAS021431	SAMN07571921	Sandiego	JLXX01.0121	126	12	85565	85565	7/12/17	0	FEMALE	NHISPANIC	Human	stool	NA
PNUSAS021430	SAMN07571920	Rubislaw	JLPX01.0059	94	133	85578	85578	7/10/17	2	MALE	NHISPANIC	Human	stool	PALM BEACH
PNUSAS021434	SAMN07571932	Poona		447	46	86023	86023	7/14/17	81	MALE	HISPANIC	Human	stool
PNUSAS021426	SAMN07568806	Anatum	JAGX01.0001	64	65	86077	86077	7/15/17	0	FEMALE	HISPANIC	Human	stool	COLLIER
PNUSAS022590	SAMN07611374	IV 50:z4,z23:-		2053	301	86542	86542	7/11/17	0	FEMALE	HISPANIC	Human		PINELLAS
PNUSAS021443	SAMN07571927	Muenchen		2870	8	86545	86545	7/13/17	0	FEMALE	NHISPANIC	Human	stool	BREVARD
PNUSAS022595	SAMN07611386	Braenderup	JBPX01.0002	22	24	86548	86548	6/7/17	40	FEMALE	NHISPANIC	Human	stool	BROWARD
PNUSAS022588	SAMN07611379	Sandiego	JLXX01.0486	126	12	86549	86549	7/1/17	2	MALE	NHISPANIC	Human	URINE	BROWARD
PNUSAS021438	SAMN07571930	Muenchen		82	8	86551	86551	7/14/17	0	MALE	NHISPANIC	Human	stool	ORANGE
PNUSAS024336	SAMN07736078	Reading		93	43	86554	86554	7/9/17	79	FEMALE	NHISPANIC	Human	URINE	SEMINOLE
PNUSAS021437	SAMN07571923	Reading		93	43	86554	86554	7/17/17	0	FEMALE	HISPANIC	Human	stool	BROWARD
PNUSAS021446	SAMN07571928	IV 48:z4,z32:-		2058	23	86555	86555	7/13/17	33	FEMALE	HISPANIC	Human	URINE	DADE
PNUSAS021439	SAMN07611377	IV 50:z4,z23:-		2053	301	86556	86556	7/13/17	0	FEMALE	HISPANIC	Human	stool	PALM BEACH
PNUSAS022587	SAMN07611381	IV 50:z4,z23:-		2053	301	86557	86557	6/13/17	9	FEMALE	NHISPANIC	Human	stool	ALACHUA
PNUSAS022084	SAMN07611376	Kiambu	TENX01.0003	309	249	86563	86563	8/2/17	7	FEMALE	NHISPANIC	Human	stool	BROWARD
PNUSAS021436	SAMN07571931	IV 50:z4,z23:-		2053	301	86567	86567	7/11/17	5	FEMALE	NHISPANIC	Human	URINE	DADE
PNUSAS022430	SAMN07611378	Anatum	JAGX01.0016	64	65	86582	86582	7/31/17	17	FEMALE	NHISPANIC	Human	stool	DUVAL
PNUSAS021888	SAMN07568810	Braenderup		22	24	86588	86588	7/19/17	21	FEMALE	UNKNOWN	Human	stool	POLK
PNUSAS021440	SAMN07571924	Braenderup	JBPX01.0101	22	24	86589	86589	7/15/17	40	FEMALE	UNKNOWN	Human	stool	BREVARD
PNUSAS022596	SAMN07611385	Schwarzengrund	JM6X01.0048	96	33	86597	86597	5/4/17	45	MALE	UNKNOWN	Human	stool	PALM BEACH
PNUSAS022591	SAMN07611375	IV 50:z4,z23:-		2053	301	86598	86598	7/11/17	63	FEMALE	NHISPANIC	Human		BROWARD
PNUSAS022599	SAMN07611383	Javiana	JGGX01.0366	1674	17	86662	86662	6/25/17	3	MALE	HISPANIC	Human	stool	DADE
PNUSAS022994	SAMN07611390	Montevideo	JIXX01.0081	138	39	86890	86890	4/25/17	60	FEMALE	NHISPANIC	Human	stool	MARION
PNUSAS018869	SAMN07361187	Manhattan		18	27	87049	87049	6/25/17	0	MALE	NHISPANIC	Human	stool	DADE
PNUSAS021427	SAMN07568807	Javiana	JGGX01.0012	24	17	87491	87491	7/7/17	48	MALE	NHISPANIC	Human	stool	LEON
PNUSAS022598	SAMN07611382	Weltevreden		365	205	88340	88340	6/25/17	0	FEMALE	NHISPANIC	Human	stool	DADE
PNUSAS032583	SAMN08388653	Paratyphi B var. Java	JLPX01.0103	43	5	88837	88837	11/8/17	0	FEMALE	NHISPANIC	Human	stool	ORANGE
PNUSAS025899	SAMN07767763	Paratyphi B var. Java	JKXX01.0121	43	5	88837	88837	5/3/17	51	MALE	NHISPANIC	Human	stool	BROWARD
PNUSAS022597	SAMN07611384	Eastbourne		414	43	89384	89384	5/4/17	8	MALE	UNKNOWN	Human	stool	BROWARD
PNUSAS040002	SAMN09044193	Berta	JAXX01.0001	435	99	90123	90123	1/24/18	5	FEMALE	UNKNOWN	Human	stool	NA
PNUSAS024240	SAMN07688201	Sandiego	JLXX01.0014	126	12	90968	90968	5/17/17	0	FEMALE	NHISPANIC	Human	stool	ALACHUA
PNUSAS024238	SAMN07688199	Newport	JJPX01.0328	31	7	91016	91016	4/13/17	70	MALE	NHISPANIC	Human	stool	SARASOTA
PNUSAS025148	SAMN07736071	Typhimurium	JPXX01.0146	19	1	91435	91435	7/13/17	3	FEMALE	UNKNOWN	Human	stool	NA
PNUSAS024612	SAMN07715096	Miami		80	111	91439	91439	5/30/17	17	MALE	NHISPANIC	Human	stool	COLLIER
PNUSAS024340	SAMN07715089	Braenderup	JBPX01.1215	22	24	91440	91440	5/26/17	1	FEMALE	HISPANIC	Human	stool	DADE
PNUSAS024607	SAMN07715092	Newport	JJPX01.0438	118	2	91443	91443	7/27/17	70	FEMALE	HISPANIC	Human	stool	PINELLAS
PNUSAS024610	SAMN07715095	Javiana	JGGX01.0027	24	17	91453	91453	7/25/17	0	MALE	NHISPANIC	Human	stool	CLAY
PNUSAS024239	SAMN07688200	Javiana	JGGX01.0094	24	17	91818	91818	4/19/17	1	MALE	NHISPANIC	Human	stool	VOLUSIA
PNUSAS025144	SAMN07736067	Rubislaw		94	133	92076	92076	7/6/17	1	MALE	NHISPANIC	Human	stool	BAY
PNUSAS025153	SAMN07736076	IIIb 61:l,v:1,5,7:[z57]		243	10	92144	92144	7/9/17	69	MALE	HISPANIC	Human	URINE	ST. LUCIE
PNUSAS025149	SAMN07736072	Litchfield	JGXX01.0046	214	61	92146	92146	7/14/17	59	FEMALE	UNKNOWN	Human	stool	LEE
PNUSAS025152	SAMN07736075	Give		3451	239	92147	92147	7/10/17	63	FEMALE	NHISPANIC	Human	URINE	BAY
PNUSAS025150	SAMN07736073	Anatum	JAGX01.0142	64	65	92148	92148	7/14/17	73	FEMALE	NHISPANIC	Human	stool	ST. JOHNS
PNUSAS025154	SAMN07736077	Sandiego		126	12	92149	92149	7/15/17	11	MALE	NHISPANIC	Human	URINE	BROWARD
PNUSAS025143	SAMN07736066	Rubislaw	JLPX01.0230	94	133	92152	92152	7/11/17	1	FEMALE	HISPANIC	Human	stool	OKALOOSA
PNUSAS025147	SAMN07736070	Tallahassee		735	328.2	92166	92166	7/11/17	64	MALE	HISPANIC	Human	stool	PUTNAM
PNUSAS025905	SAMN07767769	Montevideo	JIXX01.0013	81	40	92414	92414	5/3/17	0	MALE	NHISPANIC	Human	stool
PNUSAS025906	SAMN07767770	Paratyphi B var. Java monophasic		42	32	92423	92423	5/2/17	18	MALE	NHISPANIC	Human	stool	LAKE
PNUSAS025902	SAMN07767766	Mississippi		448	80	92451	92451	5/2/17	0	MALE	UNKNOWN	Human	stool	DUVAL
PNUSAS025900	SAMN07767764	Sandiego		126	12	92452	92452	5/2/17	2	FEMALE	UNKNOWN	Human	stool	DUVAL
PNUSAS025903	SAMN07767767	Miami		80	111	92453	92453	5/3/17	0	MALE	UNKNOWN	Human	stool	COLUMBIA
PNUSAS025897	SAMN07767761	Anatum	JAGX01.0013	64	65	92454	92454	4/29/17	62	MALE	NHISPANIC	Human	stool	HILLSBOROUGH
PNUSAS021887	SAMN07568811	Braenderup	JBPX01.0002	22	24	92661	92661	7/21/17	73	FEMALE	NHISPANIC	Human	stool	MARION
PNUSAS016442	SAMN07436219	Manhattan	JJ6X01.4483	18	27	92696	92696	3/27/17	24	MALE	UNKNOWN	Human	stool	PUTNAM
PNUSAS013979	SAMN07436224	Poona	JL6X01.0941	447	46	92751	92751	4/15/17	2	FEMALE	NHISPANIC	Human	stool	PALM BEACH
PNUSAS018328	SAMN07436206	Poona		964	315	92852	92852	6/2/17	0	FEMALE	NHISPANIC	Human	stool	PALM BEACH
PNUSAS020182	SAMN07436245	Montevideo	JIXX01.0027	81	40	92853	92853	6/28/17	32	FEMALE	NHISPANIC	Human	stool	DUVAL
PNUSAS019042	SAMN07436592	Javiana	JGGX01.0366	1674	17	92854	92854	6/28/17	90	FEMALE	NHISPANIC	Human	stool	BROWARD
PNUSAS020188	SAMN07436251	Oranienburg	JJXX01.0447	23	41	92855	92855	7/6/17	68	MALE	NHISPANIC	Human	stool	CHARLOTTE
PNUSAS020176	SAMN07436239	Braenderup	JBPX01.0126	22	24	92856	92856	6/17/17	60	FEMALE	NHISPANIC	Human	URINE	LEE
PNUSAS020165	SAMN07436228	Weltevreden	JQPX01.0048	365	205	92866	92866	6/5/17	88	MALE	HISPANIC	Human	stool	BROWARD
PNUSAS017431	SAMN07352819	Oranienburg	JJXX01.0658	3587	44	92889	92889	6/1/17	3	MALE	NHISPANIC	Human	BLOOD	HILLSBOROUGH
PNUSAS025151	SAMN07736074	IV 50:z4,z23:-		2053	301	93574	93574	7/11/17	1	FEMALE	NHISPANIC	Human	BLOOD	ST. JOHNS
PNUSAS026538	SAMN07795640	Schwarzengrund	JM6X01.0346	96	33	93581	93581	6/28/17	42	FEMALE	UNKNOWN	Human	stool	BREVARD
PNUSAS026539	SAMN07795641	Sandiego	JLXX01.0121	126	12	93597	93597	7/1/17	10	MALE	NHISPANIC	Human	BLOOD	BROWARD
PNUSAS026536	SAMN07795638	Braenderup	JBPX01.0492	22	24	93618	93618	7/6/17	80	MALE	NHISPANIC	Human		LEON
PNUSAS026547	SAMN07795649	Thompson	JP6X01.0015	26	28	94039	94039	4/20/17	9	MALE	UNKNOWN	Human	stool	ORANGE
PNUSAS026548	SAMN07795650	Thompson	JP6X01.0015	26	28	94039	94039	4/20/17	25	FEMALE	NHISPANIC	Human	stool	PINELLAS
PNUSAS026544	SAMN07795646	Javiana	JGGX01.0915	4365	NA	94040	94040	4/19/17	75	FEMALE	NHISPANIC	Human	stool	CITRUS
PNUSAS016314.a	NA	Sandiego		126	12	94054	94054	5/2/17	0	MALE	NHISPANIC	Human	stool	PUTNAM
PNUSAS026565	SAMN07795636	Braenderup	JBPX01.0002	22	24	94058	94058	5/17/17	1	MALE	NHISPANIC	Human	stool	LAKE
PNUSAS016313	SAMN07809262	Newport	JPXX01.1193	118	2	94099	94099	5/2/17	21	FEMALE	NHISPANIC	Human	stool	BREVARD
PNUSAS026549	SAMN07795651	Muenchen	JJ6X01.0107	112	8	94100	94100	4/21/17	1	FEMALE	NHISPANIC	Human	stool	ESCAMBIA
PNUSAS026559	SAMN07795630	Oranienburg	JJXX01.0028	23	41	94116	94116	5/12/17	30	MALE	UNKNOWN	Human	stool	ORANGE
PNUSAS026550	SAMN07795652	Sandiego	JLXX01.0707	126	12	94139	94139	4/24/17	2	FEMALE	HISPANIC	Human	stool	MANATEE
PNUSAS026557	SAMN07795628	Inverness		1384	246	94164	94164	4/28/17	59	MALE	NHISPANIC	Human	stool	GULF
PNUSAS026545	SAMN07795647	Braenderup	JBPX01.0098	22	24	94165	94165	4/19/17	0	FEMALE	NHISPANIC	Human	stool	BREVARD
PNUSAS026560	SAMN07795631	Javiana	JGGX01.0110	24	17	94215	94215	5/11/17	6	MALE	HISPANIC	Human	stool	PINELLAS
PNUSAS027060	SAMN07830253	Anatum	JAGX01.0134	64	65	95455	95455	10/5/17	0	FEMALE	NHISPANIC	Human	stool	DUVAL
PNUSAS027065	SAMN07830258	Sandiego		126	12	95456	95456	9/27/17	2	MALE	NHISPANIC	Human	BLOOD
PNUSAS027052	SAMN07830245	Muenchen	JJ6X01.0277	83	248	95460	95460	10/8/17	2	MALE	HISPANIC	Human	stool	BROWARD
PNUSAS027057	SAMN07830250	IV 50:z4,z23:-		2053	301	95461	95461	9/12/17	0	FEMALE	NHISPANIC	Human	stool	LEE
PNUSAS027063	SAMN07830256	Paratyphi B var. Java	JKXX01.0014	127	19	95465	95465	9/27/17	9	MALE	HISPANIC	Human	stool	BROWARD
PNUSAS027048	SAMN07830241	Javiana	JGGX01.0851	24	17	95467	95467	10/6/17	2	FEMALE	NHISPANIC	Human	URINE	ST. JOHNS
PNUSAS027046	SAMN07830239	Poona	JL6X01.0923	964	315	95472	95472	10/2/17	0	MALE	HISPANIC	Human	BLOOD	DADE
PNUSAS027223	SAMN07837980	Javiana	JGGX01.0012	24	17	95474	95474	7/10/17	35	FEMALE	NHISPANIC	Human	stool	DUVAL
PNUSAS027054	SAMN07830247	Bareilly	JAPX01.0064	2553	382	95476	95476	10/7/17	4	MALE	HISPANIC	Human	stool	COLLIER
PNUSAS027217	SAMN07837974	Miami		80	111	95477	95477	7/9/17	60	FEMALE	NHISPANIC	Human	URINE	PASCO
PNUSAS027059	SAMN07830252	Anatum	JAGX01.0001	64	65	95478	95478	10/6/17	0	FEMALE	NHISPANIC	Human	stool
PNUSAS027260	SAMN07837993	Baildon		2166	399	95483	95483	6/16/17	0	FEMALE	HISPANIC	Human	stool	DADE
PNUSAS027262	SAMN07837995	Typhimurium	JPXX01.0127	19	1	95487	95487	6/13/17	3	MALE	HISPANIC	Human	stool	PALM BEACH
PNUSAS027261	SAMN07837994	Muenchen	JJ6X01.0720	112	8	95488	95488	6/13/17	0	MALE	HISPANIC	Human		DADE
PNUSAS027058	SAMN07830251	IV 48:g,z51:-		454	23	95489	95489	9/26/17	0	MALE	NHISPANIC	Human	stool	PINELLAS
PNUSAS027246	SAMN07842088	Nima		1254	445	95495	95495	9/26/17	53	MALE	NHISPANIC	Human	stool	LEE
PNUSAS027056	SAMN07830249	Nima		1254	445	95495	95495	9/26/17	53	MALE	NHISPANIC	Human	stool	LEE
PNUSAS027259	SAMN07837992	Sandiego		126	12	95503	95503	6/19/17	0	MALE	NHISPANIC	Human	stool	BROWARD
PNUSAS027250	SAMN07837983	Sandiego		126	12	95504	95504	5/9/17	1	FEMALE	HISPANIC	Human	stool	BROWARD
PNUSAS027256	SAMN07837989	Sandiego	JLXX01.0754	126	12	95505	95505	6/13/17	2	MALE	HISPANIC	Human	stool	DADE
PNUSAS027045	SAMN07830238	Sandiego	JLXX01.0588	126	12	95512	95512	10/3/17	3	MALE	HISPANIC	Human	BLOOD	ORANGE
PNUSAS027257	SAMN07837990	Montevideo	JIXX01.0023	4	40	95533	95533	6/9/17	56	FEMALE	UNKNOWN	Human	stool	DADE
PNUSAS027055	SAMN07830248	Javiana		24	17	95534	95534	10/8/17	49	FEMALE	NHISPANIC	Human	stool	ESCAMBIA
PNUSAS027050	SAMN07830243	Javiana	JGGX01.0110	24	17	95538	95538	10/4/17	54	MALE	NHISPANIC	Human		PINELLAS
PNUSAS027218	SAMN07837975	IV 50:z4,z23:-		2053	301	95540	95540	7/8/17	0	MALE	NHISPANIC	Human	stool
PNUSAS027222	SAMN07837979	Newport	JJPX01.0235	118	2	95541	95541	6/24/17	10	MALE	NHISPANIC	Human	stool	BROWARD
PNUSAS027061	SAMN07830254	Newport	JJPX01.0384	118	2	95591	95591	10/4/17	9	MALE	NHISPANIC	Human	stool	ST. JOHNS
PNUSAS047002	SAMN09739385	Braenderup	JBPX01.0182	22	24	95632	168129	5/12/18	29	MALE	NHISPANIC	Human	stool	PALM BEACH
PNUSAS027185	SAMN07842070	Sandiego		126	12	95728	95728	4/25/17	0	MALE	HISPANIC	Human	stool	LEE
PNUSAS027227	SAMN07842089	Eastbourne		414	43	95736	95736	7/8/17	40	MALE	NHISPANIC	Human	stool	PALM BEACH
PNUSAS027238	SAMN07842085	Thompson	JP6X01.0029	4384	28	95737	95737	10/5/17	27	MALE	NHISPANIC	Human	stool	BROWARD
PNUSAS027243	SAMN07842075	Newport	JJPX01.5556	118	2	95739	95739	10/4/17	48	FEMALE	NHISPANIC	Human	BLOOD	HERNANDO
PNUSAS027229	SAMN07842091	IV 50:z4,z23:-		2053	301	95748	95748	7/6/17	37	FEMALE	HISPANIC	Human	stool	POLK
PNUSAS027239	SAMN07842086	Sendai		80	111	95749	95749	10/5/17	0	MALE	NHISPANIC	Human	stool	LEVY
PNUSAS027224	SAMN07842078	Saintpaul	JN6X01.0143	95	209	95751	95751	7/7/17	62	MALE	NHISPANIC	Human	stool	SUMTER
PNUSAS027225	SAMN07842079	IV 50:z4,z23:-		2053	301	95754	95754	7/9/17	0	MALE	NHISPANIC	Human	stool	LEE
PNUSAS027232	SAMN07842071	IV 50:z4,z23:-		2053	301	95755	95755	10/5/17	78	MALE	NHISPANIC	Human	stool	POLK
PNUSAS027228	SAMN07842090	Miami		80	111	96276	96276	7/6/17	55	FEMALE	NHISPANIC	Human	stool	HIGHLANDS
PNUSAS026535	SAMN07795637	Rubislaw	JLPX01.0361	94	133	97223	97223	6/13/17	74	MALE	HISPANIC	Human	stool	LAKE
PNUSAS026541	SAMN07795643	Ituri		455	429	97224	97224	6/30/17	5	FEMALE	NHISPANIC	Human	URINE	BREVARD
PNUSAS027607	SAMN08007399	Javiana	JGGX01.0012	24	17	97357	97357	10/9/17	0	MALE	NHISPANIC	Human	stool	ESCAMBIA
PNUSAS027609	SAMN08007401	Orion		639	166	97366	97366	10/2/17	2	MALE	HISPANIC	Human	stool	DADE
PNUSAS027601	SAMN08007394	Miami		80	111	97368	97368	10/6/17	66	MALE	NHISPANIC	Human	stool	SUWANNEE
PNUSAS027603	SAMN08007396	Montevideo	JIXX01.0140	4	40	97369	97369	10/8/17	55	FEMALE	NHISPANIC	Human	BLOOD	PALM BEACH
PNUSAS027605	SAMN08007398	Saintpaul	JN6X01.0030	95	209	97373	97373	10/10/17	1	MALE	NHISPANIC	Human	stool	VOLUSIA
PNUSAS027604	SAMN08007397	Saintpaul	JN6X01.0044	95	209	97395	97395	10/8/17	9	MALE	NHISPANIC	Human	URINE	COLUMBIA
PNUSAS027240	SAMN08039003	Rubislaw	JLPX01.0059	94	133	98273	98273	10/5/17	38	MALE	HISPANIC	Human	stool	OSCEOLA
PNUSAS027606	SAMN08016800	Florida	JAAX01	931	81	98304	98304	10/9/17	1	MALE	NHISPANIC	Human	stool	POLK
PNUSAS028293	SAMN08053127	Sandiego	JLXX01.0480	126	12	98417	98417	10/1/17	49	MALE	UNKNOWN	Human	stool	BROWARD
PNUSAS028299	SAMN08053134	IV 50:z4,z23:-	JLXX01.0780	2053	301	98418	98418	8/24/17	0	MALE	HISPANIC	Human	stool	SARASOTA
PNUSAS028305	SAMN08053140	Sandiego		126	12	98419	98419	8/23/17	42	FEMALE	NHISPANIC	Human	stool	LAKE
PNUSAS028311	SAMN08053146	Sandiego		126	12	98419	98419	8/23/17	49	FEMALE	UNKNOWN	Human	stool	HILLSBOROUGH
PNUSAS028556	SAMN08040144	Montevideo	JIXX01.0050	4	40	98617	98617	10/25/17	1	MALE	HISPANIC	Human	stool	BROWARD
PNUSAS028567	SAMN08040152	Poona		447	46	98618	98618	10/23/17	0	FEMALE	NHISPANIC	Human	BLOOD	BROWARD
PNUSAS028564	SAMN08040149	Newport	JJPX01.0011	5	2	98619	98619	10/21/17	71	MALE	NHISPANIC	Human	stool	GADSDEN
PNUSAS028569	SAMN08040154	Javiana	JGGX01.0012	24	17	98653	98653	10/21/17	75	MALE	NHISPANIC	Human	BLOOD	LEON
PNUSAS028557	SAMN08040145	Newport	JJPX01.0036	118	2	98654	98654	10/25/17	4	MALE	NHISPANIC	Human	stool	DUVAL
PNUSAS028555	SAMN08040143	Newport	JJPX01.2505	118	2	98656	98656	10/25/17	77	FEMALE	NHISPANIC	Human	stool	BROWARD
PNUSAS028562	SAMN08040147	Braenderup	JBPX01.0968	22	24	98657	98657	10/23/17	0	MALE	NHISPANIC	Human	stool	PALM BEACH
PNUSAS028553	SAMN08040141	I 4,[5],12:i:-	JPXX01.3705	34	1	98658	98658	10/25/17	63	FEMALE	NHISPANIC	Human	BLOOD	OSCEOLA
PNUSAS028551	SAMN08040139	Sandiego	JLXX01.0354	126	12	98662	98662	10/25/17	55	MALE	NHISPANIC	Human	URINE	DUVAL
PNUSAS028566	SAMN08040151	Montevideo	JIXX01.0140	4	40	98663	98663	10/14/17	26	FEMALE	HISPANIC	Human	stool	BROWARD
PNUSAS028310	SAMN08053145	Braenderup	JBPX01.0002	22	24	99052	99052	8/24/17	0	FEMALE	HISPANIC	Human	stool	LEE
PNUSAS028313	SAMN08053148	Thompson	JP6X01.0001	26	28	99053	99053	8/23/17	12	MALE	NHISPANIC	Human	stool	ST. LUCIE
PNUSAS028302	SAMN08053137	Muenchen	JJ6X01	112	8	99055	99055	8/28/17	0	FEMALE	UNKNOWN	Human	stool	ST. JOHNS
PNUSAS028300	SAMN08053135	Sandiego		126	12	99146	99146	8/23/17	79	MALE	NHISPANIC	Human	stool	SARASOTA
PNUSAS028294	SAMN08053128	Paratyphi B var. Java	JKXX01.0031	88	19	99148	99148	10/3/17	5	MALE	HISPANIC	Human	stool	LEE
PNUSAS017452	SAMN07370929	Montevideo	JIXX01.0730	4	40	99149	99149	10/9/17	71	FEMALE	NHISPANIC	Human	URINE	BROWARD
PNUSAS028301	SAMN08053136	Newport	JJPX01.0041	5	2	99150	99150	8/24/17	0	FEMALE	NHISPANIC	Human		ST. JOHNS
PNUSAS028309	SAMN08053144	Javiana	JGGX01.0039	24	17	99151	99151	8/25/17	73	MALE	UNKNOWN	Human	stool	PINELLAS
PNUSAS028308	SAMN08053143	Braenderup	JBPX01.0559	22	24	99152	99152	8/29/17	1	FEMALE	NHISPANIC	Human	stool	ORANGE
PNUSAS028298	SAMN08053133	Saintpaul		95	209	99153	99153	10/10/17	72	FEMALE	NHISPANIC	Human	URINE	VOLUSIA
PNUSAS030016	SAMN08166027	Javiana	JGGX01.2520	24	17	99154	99154	10/4/17	5	MALE	NHISPANIC	Human	stool	PALM BEACH
PNUSAS028291	SAMN08053125	Javiana	JGGX01.2520	24	17	99154	99154	10/4/17	26	FEMALE	HISPANIC	Human	stool	DADE
PNUSAS028999	SAMN08105168	Poona	JL6X01.0099	964	315	99767	99767	11/3/17	21	FEMALE	NHISPANIC	Human	stool	ESCAMBIA
PNUSAS042975	SAMN09429117	Montevideo	JIXX01.0011	4451	40	99857	99857	4/30/18	77	FEMALE	NHISPANIC	Human	stool	MARION
PNUSAS015615	SAMN07227120	Montevideo	JIXX01.1175	4451	40	99857	99857	5/12/17	36	FEMALE	NHISPANIC	Human	stool	LEVY
PNUSAS028982	SAMN08105151	Enteritidis	JEGX01.0031	11	4	99933	99933	10/22/17	0	MALE	HISPANIC	Human	stool	BROWARD
PNUSAS028980	SAMN08105149	Javiana	JGGX01.0027	24	17	99937	99937	11/4/17	0	MALE	NHISPANIC	Human	stool	LEE
PNUSAS028981	SAMN08105150	Muenchen		112	8	99943	99943	11/2/17	66	MALE	UNKNOWN	Human	stool	HILLSBOROUGH
PNUSAS028978	SAMN08105147	Anatum	JAGX01.0001	64	65	99946	99946	11/3/17	52	FEMALE	HISPANIC	Human	stool	LAKE
PNUSAS028983	SAMN08105152	Mississippi	JIPX01.0013	4453	80	99953	99953	10/31/17	64	FEMALE	NHISPANIC	Human	stool	BAY
PNUSAS028996	SAMN08105165	Enteritidis	JEGX01.1230	1925	4	99973	99973	11/2/17	30	MALE	UNKNOWN	Human	stool	PINELLAS
PNUSAS038681	SAMN08930235	Newport	JJPX01.0036	118	2	99976	116950	1/27/18	2	MALE	UNKNOWN	Human	stool	DADE
PNUSAS028998	SAMN08105167	Newport	JJPX01.0036	118	2	99976	99976	11/5/17	48	FEMALE	NHISPANIC	Human	stool	PALM BEACH
PNUSAS029006	SAMN08105175	Mississippi	JIPX01.0106	448	80	99977	99977	11/5/17	60	MALE	NHISPANIC	Human	stool	BAY
PNUSAS028987	SAMN08105156	Javiana	JGGX01.0110	24	17	99978	99978	11/1/17	1	FEMALE	NHISPANIC	Human	stool	DUVAL
PNUSAS029003	SAMN08105172	Javiana	JGGX01.0871	24	17	99979	99979	11/5/17	59	FEMALE	NHISPANIC	Human	stool	LEE
PNUSAS028991	SAMN08105160	Reading		93	43	99980	99980	10/31/17	73	MALE	NHISPANIC	Human	BLOOD	SARASOTA
PNUSAS028993	SAMN08105162	Baildon	TDEX01.0002	2166	399	99981	99981	11/3/17	88	FEMALE	NHISPANIC	Human	URINE	MARTIN
PNUSAS029007	SAMN08105176	Newport	JJPX01.0032	118	2	99985	99985	10/27/17	0	FEMALE	NHISPANIC	Human	stool	CALHOUN
PNUSAS041791	SAMN09374788	Braenderup	JBPX01.0002	22	24	99999	99999	3/22/18	3	FEMALE	HISPANIC	Human	stool	HILLSBOROUGH
PNUSAS028990	SAMN08105159	Sandiego	JLXX01.0014	126	12	100002	100002	11/2/17	3	FEMALE	HISPANIC	Human	BLOOD	HILLSBOROUGH
PNUSAS029005	SAMN08105174	Newport	JJPX01.0036	118	2	100006	100006	11/2/17	5	MALE	HISPANIC	Human	stool	LEON
PNUSAS028985	SAMN08105154	Sandiego		126	12	100011	100011	11/2/17	12	FEMALE	NHISPANIC	Human	stool	PALM BEACH
PNUSAS028994	SAMN08105163	Javiana	JGGX01.0047	24	17	100012	100012	11/5/17	3	MALE	NHISPANIC	Human	stool	NASSAU
PNUSAS028988	SAMN08105157	Oranienburg	JJXX01.0028	23	41	100014	100014	11/2/17	9	FEMALE	NHISPANIC	Human	BLOOD	BROWARD
PNUSAS028992	SAMN08105161	Thompson	JP6X01.0108	26	28	100015	100015	10/31/17	33	MALE	NHISPANIC	Human	BLOOD	ORANGE
PNUSAS028984	SAMN08105153	Braenderup	JBPX01.0039	22	24	100016	100016	11/2/17	8	MALE	NHISPANIC	Human	stool	HILLSBOROUGH
PNUSAS028995	SAMN08105164	Newport		118	2	100042	100042	11/2/17	56	FEMALE	NHISPANIC	Human	stool
PNUSAS029677	SAMN08134013	Braenderup	JBPX01.0244	22	24	100701	100701	9/16/17	4	MALE	NHISPANIC	Human	stool	PALM BEACH
PNUSAS029688	SAMN08134021	Poona	JL6X01.0408	964	315	100703	100703	10/3/17	4	MALE	HISPANIC	Human	stool	DADE
PNUSAS029684	SAMN08134018	Poona	JL6X01.0887	447	46	100708	100708	9/19/17	1	MALE	HISPANIC	Human	BLOOD	DADE
PNUSAS029679	SAMN08134015	Oranienburg	JJXX01.1332	23	41	100709	100709	9/18/17	1	FEMALE	NHISPANIC	Human	BLOOD	BROWARD
PNUSAS032578	SAMN08630792	Sendai		80	111	101531	101531	11/1/17	61	FEMALE	NHISPANIC	Human	stool	PALM BEACH
PNUSAS032586	SAMN08388656	Sendai		80	111	101531	101531	11/8/17	0	FEMALE	NHISPANIC	Human	stool	HILLSBOROUGH
PNUSAS030017	SAMN08166020	Sandiego	JAAX01	126	12	102029	102029	10/20/17	66	MALE	NHISPANIC	Human	stool	BROWARD
PNUSAS030021	SAMN08166023	Newport		118	2	102354	102354	9/19/17	1	FEMALE	HISPANIC	Human	BLOOD	MARTIN
PNUSAS030023	SAMN08166025	Sandiego		126	12	102359	102359	10/10/17	1	FEMALE	NHISPANIC	Human	stool	PALM BEACH
PNUSAS030020	SAMN08166022	Baildon	TDEX01.0012	2166	399	102360	102360	9/18/17	2	FEMALE	HISPANIC	Human	BLOOD	DADE
PNUSAS030018	SAMN08166021	Montevideo	JIXX01.0140	195	40	102365	102365	10/27/17	67	FEMALE	NHISPANIC	Human		BROWARD
PNUSAS029686	SAMN08134019	Sandiego	JLXX01.0121	126	12	102412	102412	9/19/17	42	FEMALE	UNKNOWN	Human	BLOOD	DADE
PNUSAS027233	SAMN07842083	IV 50:z4,z23:-		2053	301	102506	102506	10/5/17	0	FEMALE	NHISPANIC	Human	stool	POLK
PNUSAS025901	SAMN07767765	Typhimurium	JPXX01.0868	19	1	102537	102537	5/2/17	28	FEMALE	HISPANIC	Human	stool	MARION
PNUSAS027062	SAMN07830255	Muenchen		112	8	102555	102555	10/5/17	91	FEMALE	NHISPANIC	Human	stool	DUVAL
PNUSAS030019	SAMN08166028	Baildon	TDEX01.0001	2166	399	102617	102617	10/23/17	71	FEMALE	HISPANIC	Human	stool	POLK
PNUSAS027234	SAMN07842084	Sandiego		126	12	102893	102893	10/5/17	1	FEMALE	NHISPANIC	Human	stool	BROWARD
PNUSAS030369	SAMN08213476	Braenderup	JBPX01.0039	22	24	103250	103250	10/8/17	15	FEMALE	NHISPANIC	Human	stool	BROWARD
PNUSAS030028	SAMN08166030	Javiana	JGGX01.0023	24	17	103258	103258	10/17/17	2	MALE	NHISPANIC	Human	stool	MARION
PNUSAS035064	SAMN08638872	I 1,4,[5],12:b:-	JIXX01.0140	42	32	103577	103577	1/12/17	0	FEMALE	HISPANIC	Human	stool	DADE
PNUSAS029682	SAMN08224097	Poona	JL6X01.0542	964	315	103708	103708	9/19/17	3	FEMALE	NHISPANIC	Human	BLOOD	BROWARD
PNUSAS030960	SAMN08235413	Muenchen		112	8	105195	105195	11/2/17	63	FEMALE	UNKNOWN	Human	stool	HILLSBOROUGH
PNUSAS038690	SAMN08955947	Braenderup	JBPX01.0287	22	24	105196	117491	9/25/17	60	FEMALE	UNKNOWN	Human	stool	HILLSBOROUGH
PNUSAS030162	SAMN08211524	Braenderup	JBPX01.0287	22	24	105196	105196	9/25/17	61	FEMALE	UNKNOWN	Human	stool	LEE
PNUSAS033802	SAMN08639138	Sandiego	JLXX01.0331	126	12	105198	182301	11/15/17	66	FEMALE	HISPANIC	Human	stool	OSCEOLA
PNUSAS030161	SAMN08211523	Sandiego	JLXX01.0331	126	12	105198	105198	9/23/17	0	MALE	UNKNOWN	Human	stool	ORANGE
PNUSAS030140	SAMN08211505	Sandiego		126	12	105200	105200	10/28/17	0	FEMALE	HISPANIC	Human	stool	BROWARD
PNUSAS030150	SAMN08211514	Rubislaw	JLPX01.0059	94	133	105203	105203	11/1/17	1	MALE	HISPANIC	Human	stool	DADE
PNUSAS030954	SAMN08235409	Javiana	JGGX01.2505	24	17	105205	105205	11/1/17	2	MALE	NHISPANIC	Human	stool	MANATEE
PNUSAS030155	SAMN08211519	Newport	JJPX01.0602	45	3	105206	105206	11/4/17	1	FEMALE	HISPANIC	Human		BROWARD
PNUSAS030952	SAMN08235407	Javiana	JGGX01.0110	24	17	105207	105207	10/31/17	1	MALE	UNKNOWN	Human	stool	MANATEE
PNUSAS030943	SAMN08235398	Litchfield	JGXX01.0019	2451	61	105208	105208	10/25/17	72	MALE	UNKNOWN	Human	stool	CHARLOTTE
PNUSAS030376	SAMN08294538	Litchfield	JGXX01.0019	2451	61	105208	105208	10/25/17	55	MALE	UNKNOWN	Human	stool	PINELLAS
PNUSAS030390	SAMN08294551	Litchfield	JGXX01.0019	2451	61	105208	105208	10/25/17	41	MALE	UNKNOWN	Human		LEE
PNUSAS030389	SAMN08294550	Litchfield	JGGX01.0092	2451	61	105208	105208	10/26/17	1	MALE	NHISPANIC	Human		SANTA ROSA
PNUSAS030388	SAMN08294549	Rubislaw	JGXX01.0019	94	133	105209	105209	10/25/17	57	FEMALE	HISPANIC	Human		ORANGE
PNUSAS030378	SAMN08294540	Muenchen		2870	8	105210	105210	10/25/17	0	FEMALE	NHISPANIC	Human	stool	PALM BEACH
PNUSAS030157	SAMN08211520	Anatum	JAGX01.0013	64	65	105213	181946	9/20/17	79	FEMALE	NHISPANIC	Human	stool	BAY
PNUSAS030158	SAMN08211521	Anatum	JAGX01.0013	64	65	105213	105213	9/23/17	55	FEMALE	NHISPANIC	Human	stool	LEVY
PNUSAS030159	SAMN08211522	Javiana	JGGX01.0915	24	17	105214	105214	9/22/17	52	FEMALE	UNKNOWN	Human	stool	SARASOTA
PNUSAS030163	SAMN08211525	Javiana	JGGX01.0699	24	17	105214	105214	9/22/17	21	FEMALE	NHISPANIC	Human	stool	PASCO
PNUSAS030143	SAMN08211508	Gaminara		239	245	105215	105215	10/31/17	0	FEMALE	NHISPANIC	Human	stool	DADE
PNUSAS030142	SAMN08211507	Weltevreden	JQPX01.0048	365	205	105217	105217	10/31/17	57	FEMALE	HISPANIC	Human	stool	DADE
PNUSAS030141	SAMN08211506	Infantis	JFXX01.0022	32	31	105218	105218	10/30/17	11	MALE	HISPANIC	Human	stool	COLLIER
PNUSAS030945	SAMN08235400	Newport	JJPX01.0092	118	2	105220	105220	10/31/17	49	FEMALE	NHISPANIC	Human	stool	HILLSBOROUGH
PNUSAS030956	SAMN08235411	Newport	JJPX01.0274	118	2	105220	105220	10/31/17	65	MALE	UNKNOWN	Human	stool	ORANGE
PNUSAS030139	SAMN08211504	Rubislaw	JLPX01.0443	1575	204	105223	105223	10/27/17	28	MALE	HISPANIC	Human	stool	DADE
PNUSAS033660	SAMN08799893	Javiana	JGGX01.0092	24	17	105227	105227	11/8/17	1	MALE	NHISPANIC	Human	stool	ST. JOHNS
PNUSAS030379	SAMN08294541	IV 40:z4,z24:-		2868	419	105228	105228	10/27/17	0	FEMALE	NHISPANIC	Human	stool	BREVARD
PNUSAS030392	SAMN08294552	Hartford		3851	169	105229	105229	10/27/17	11	FEMALE	NHISPANIC	Human		ORANGE
PNUSAS030377	SAMN08294539	Saintpaul	JN6X01.0492	95	209	105230	105230	10/27/17	23	FEMALE	NHISPANIC	Human	stool	SARASOTA
PNUSAS030148	SAMN08211512	Gaminara		239	245	105232	105232	10/31/17	48	MALE	HISPANIC	Human	stool	DADE
PNUSAS030955	SAMN08235410	I 1,4,[5],12:b:-	JKXX01.0114	1838	155	105233	105233	11/1/17	65	FEMALE	NHISPANIC	Human	stool	HILLSBOROUGH
PNUSAS030953	SAMN08235408	Newport	JJPX01.5406	118	2	105242	105242	11/1/17	3	MALE	NHISPANIC	Human	stool	PASCO
PNUSAS030149	SAMN08211513	Sandiego	JLXX01.0661	126	12	105243	105243	10/31/17	82	MALE	NHISPANIC	Human	stool	COLLIER
PNUSAS030947	SAMN08235402	Sandiego	JLXX01.0799	126	12	105247	105247	10/30/17	5	FEMALE	HISPANIC	Human	BLOOD	DADE
PNUSAS030963	SAMN08235416	Newport	JJPX01.0235	118	2	105248	105248	11/2/17	10	FEMALE	NHISPANIC	Human	stool
PNUSAS031712	SAMN08292389	Newport	JJPX01.0235	118	2	105248	105248	11/2/17	11	FEMALE	NHISPANIC	Human	stool	HILLSBOROUGH
PNUSAS036027	SAMN08774329	Oranienburg	JJXX01.0001	23	41	105249	105249	11/22/17	77	FEMALE	NHISPANIC	Human	stool	BREVARD
PNUSAS033682	SAMN08799889	Oranienburg	JJXX01.0001	23	41	105249	105249	11/17/17	0	MALE	NHISPANIC	Human	stool	BREVARD
PNUSAS030950	SAMN08235405	Oranienburg	JJXX01.0001	23	41	105249	105249	11/1/17	0	FEMALE	HISPANIC	Human	stool	BREVARD
PNUSAS035544	SAMN08774336	Oranienburg	JJXX01.0001	23	41	105249	105249	11/22/17	21	FEMALE	NHISPANIC	Human	stool	PUTNAM
PNUSAS030381	SAMN08297373	Rubislaw	JGGX01.0013	94	133	105250	105250	10/27/17	0	MALE	UNKNOWN	Human	stool	ORANGE
PNUSAS030393	SAMN08297375	Rubislaw		1575	204	105251	105251	10/24/17	0	FEMALE	NHISPANIC	Human		DUVAL
PNUSAS030949	SAMN08235404	Newport		118	2	105252	105252	10/31/17	50	FEMALE	NHISPANIC	Human	stool	LEE
PNUSAS030373	SAMN08173800	Newport	JJPX01.0032	118	2	105253	105253	10/16/17	53	MALE	UNKNOWN	Human	stool	NASSAU
PNUSAS030944	SAMN08235399	Braenderup	JBPX01.0492	22	24	105255	105255	10/24/17	60	FEMALE	NHISPANIC	Human	stool	NA
PNUSAS030965	SAMN08235418	Rubislaw	JLPX01.0059	94	133	105256	105256	11/2/17	8	FEMALE	UNKNOWN	Human	stool	LEE
PNUSAS030964	SAMN08235417	Javiana	JGGX01.0094	24	17	105287	105287	11/2/17	1	FEMALE	UNKNOWN	Human		DUVAL
PNUSAS030165	SAMN08211527	Newport	JFXX01.1070	118	2	105293	105293	9/20/17	0	FEMALE	NHISPANIC	Human	stool	OSCEOLA
PNUSAS030156	SAMN08294530	Saintpaul	JN6X01.0024	95	209	105294	105294	9/20/17	1	FEMALE	NHISPANIC	Human	stool	DUVAL
PNUSAS030372	SAMN08213454	IV 50:z4,z23:-		2053	301	105296	105296	9/25/17	58	FEMALE	UNKNOWN	Human	URINE	LEE
PNUSAS030959	SAMN08235412	Thompson	JP6X01.0015	26	28	105297	105297	11/1/17	1	MALE	UNKNOWN	Human	stool	BREVARD
PNUSAS030160	SAMN08294529	Javiana	JGGX01.0027	24	17	105298	105298	9/22/17	19	FEMALE	HISPANIC	Human	stool	LEE
PNUSAS030961	SAMN08235414	Newport	JJPX01.0032	118	2	105316	105316	11/2/17	17	MALE	NHISPANIC	Human	stool	ESCAMBIA
PNUSAS045108	SAMN09761635	Montevideo	JIXX01.0011	316	40	106016	106016	4/25/18	58	FEMALE	UNKNOWN	Human	stool	PALM BEACH
PNUSAS042973	SAMN09429119	Montevideo	JIXX01.0011	316	40	106016	106016	5/10/18	51	FEMALE	NHISPANIC	Human		LAKE
PNUSAS042524	SAMN09379934	Montevideo	JIXX01.0011	316	40	106016	106016	4/30/18	29	FEMALE	NHISPANIC	Human	stool	INDIAN RIVER
PNUSAS039193	SAMN09011194	Montevideo	JIXX01.0011	316	40	106016	106016	3/29/18	64	FEMALE	NHISPANIC	Human	stool	PALM BEACH
PNUSAS037355	SAMN08815102	Montevideo	JIXX01.0011	316	40	106016	106016	2/12/18	52	FEMALE	NHISPANIC	Human	stool	ORANGE
PNUSAS037356	SAMN08815098	Montevideo	JIXX01.0011	316	40	106016	106016	2/16/18	50	FEMALE	NHISPANIC	Human	stool	MARTIN
PNUSAS042523	SAMN09379935	Montevideo	JIXX01.0011	316	40	106016	106016	4/21/18	23	MALE	NHISPANIC	Human	stool	PALM BEACH
PNUSAS042974	SAMN09429118	Montevideo	JIXX01.0011	316	40	106016	106016	5/1/18	25	FEMALE	NHISPANIC	Human	stool	PALM BEACH
PNUSAS047840	SAMN09727039	Montevideo	JIXX01.0011	316	40	106016	106016	5/23/18	63	FEMALE	UNKNOWN	Human	stool	BROWARD
PNUSAS027252	SAMN07837985	Sandiego	JLXX01.0713	126	12	106512	106512	6/12/17	1	FEMALE	UNKNOWN	Human	stool	DADE
PNUSAS019703	SAMN08016884	Newport	JJPX01.0010	132	7	106562	106562	6/24/17	72	MALE	NHISPANIC	Human	stool	HILLSBOROUGH
PNUSAS044526	SAMN09510574	Enteritidis	JEGX01.0005	11	4	106844	133322	5/21/18	43	FEMALE	NHISPANIC	Human		HILLSBOROUGH
PNUSAS036134	SAMN08772909	Infantis	JFXX01.0025	32	31	106860	106860	12/30/17	59	FEMALE	HISPANIC	Human	stool	DADE
PNUSAS030144	SAMN08388645	Muenchen		112	8	107919	107919	10/12/17	0	FEMALE	HISPANIC	Human	stool	DADE
PNUSAS027247	SAMN08445995	Sandiego		126	12	108159	108159	5/26/17	55	MALE	NHISPANIC	Human	stool	BROWARD
PNUSAS042192	SAMN09379952	Oranienburg	JJXX01.0225	23	41	108392	108392	2/15/18	28	MALE	NHISPANIC	Human		DUVAL
PNUSAS010602	SAMN06624638	Paratyphi B var. Java		88	19	108917	108917	1/31/17	18	MALE	UNKNOWN	Human	stool	ST. LUCIE
PNUSAS031709	SAMN08292386	Sandiego	JLXX01.0556	126	12	109532	109532	11/4/17	68	FEMALE	NHISPANIC	Human	stool	HILLSBOROUGH
PNUSAS031692	SAMN08292369	Sandiego	JLXX01.0556	126	12	109532	109532	11/3/17	11	MALE	UNKNOWN	Human	stool	SARASOTA
PNUSAS032582	SAMN08388652	Sandiego	JJPX01.3381	126	12	109532	109532	11/2/17	50	FEMALE	NHISPANIC	Human	stool	MANATEE
PNUSAS032587	SAMN08388657	Enteritidis	JJPX01.0384	1973	4	109541	109541	11/8/17	1	MALE	NHISPANIC	Human	stool	CLAY
PNUSAS032918	SAMN08434798	Javiana	JGGX01.0094	24	17	109542	109542	11/22/17	1	MALE	HISPANIC	Human		PINELLAS
PNUSAS033315	SAMN08436369	Javiana	JGGX01.0092	24	17	109548	109548	11/1/17	12	MALE	NHISPANIC	Human	stool	ORANGE
PNUSAS032572	SAMN08630800	Javiana	JGGX01.0366	1674	17	109551	109551	11/7/17	49	MALE	UNKNOWN	Human	stool	LAKE
PNUSAS032580	SAMN08388650	Javiana	JPXX01.2583	1674	17	109551	109551	11/1/17	12	MALE	UNKNOWN	Human	stool	DADE
PNUSAS032265	SAMN08383944	Tallahassee		735	328.2	109553	109553	11/3/17	0	FEMALE	NHISPANIC	Human	stool	ST. JOHNS
PNUSAS032919	SAMN08434799	Newport	JJPX01.0438	118	2	109560	109560	11/20/17	35	MALE	NHISPANIC	Human		ORANGE
PNUSAS032584	SAMN08388654	IV 48:g,z51:-	JAPX01.0064	433	23	109574	109574	11/9/17	22	MALE	NHISPANIC	Human	stool	ORANGE
PNUSAS032922	SAMN08434802	Sandiego	JLXX01.0556	126	12	109576	109576	11/22/17	1	FEMALE	NHISPANIC	Human	BLOOD	SARASOTA
PNUSAS032921	SAMN08434801	Rubislaw		1575	204	109578	109578	11/17/17	0	FEMALE	NHISPANIC	Human		ORANGE
PNUSAS032923	SAMN08434803	Thompson	JP6X01.0003	26	28	109580	109580	11/28/17	75	FEMALE	NHISPANIC	Human	stool	LEE
PNUSAS031697	SAMN08292374	Infantis	JFXX01.0154	32	31	110262	110262	11/1/17	70	FEMALE	NHISPANIC	Human	stool	MANATEE
PNUSAS031716	SAMN08292393	Miami		80	111	110488	110488	11/6/17	1	MALE	UNKNOWN	Human	stool	HILLSBOROUGH
PNUSAS031701	SAMN08292378	Bareilly	JAPX01.0064	2553	382	110504	110504	11/3/17	9	MALE	UNKNOWN	Human	stool	HILLSBOROUGH
PNUSAS030957	SAMN08388662	Sandiego		126	12	110507	110507	11/1/17	61	FEMALE	NHISPANIC	Human	stool	CLAY
PNUSAS031705	SAMN08292382	Saintpaul	JN6X01.0746	95	209	110514	110514	11/3/17	0	FEMALE	UNKNOWN	Human	stool	CLAY
PNUSAS031715	SAMN08292392	Hartford		405	169	110515	110515	11/1/17	38	MALE	NHISPANIC	Human	stool	VOLUSIA
PNUSAS031696	SAMN08292373	Javiana	JGGX01.0238	24	17	110519	110519	11/3/17	37	MALE	HISPANIC	Human	stool	HILLSBOROUGH
PNUSAS031699	SAMN08292376	Rubislaw	JLPX01.0059	94	133	110534	110534	11/3/17	1	FEMALE	UNKNOWN	Human	stool	NA
PNUSAS031698	SAMN08292375	Baildon		2166	399	110537	110537	11/1/17	39	FEMALE	NHISPANIC	Human	stool	SARASOTA
PNUSAS031693	SAMN08292370	Typhimurium	JPXX01.0006	19	1	110538	110538	11/2/17	1	FEMALE	NHISPANIC	Human	stool	LAKE
PNUSAS031710	SAMN08292387	Reading		93	43	110541	110541	11/4/17	13	FEMALE	NHISPANIC	Human	stool	LEE
PNUSAS031708	SAMN08292385	Javiana	JGGX01.0213	24	17	110542	110542	11/6/17	49	FEMALE	UNKNOWN	Human	stool	HILLSBOROUGH
PNUSAS031714	SAMN08292391	Braenderup	JBPX01.0523	22	24	110543	110543	11/2/17	52	FEMALE	NHISPANIC	Human	stool	HILLSBOROUGH
PNUSAS031700	SAMN08292377	Newport	JJPX01.0438	118	2	110544	110544	11/3/17	0	MALE	NHISPANIC	Human	stool	PINELLAS
PNUSAS031691	SAMN08292368	Oranienburg	JJXX01.0003	23	41	110549	153262	11/3/17	0	MALE	NHISPANIC	Human	stool	MARION
PNUSAS031704	SAMN08292381	Oranienburg	JJXX01.0003	23	41	110549	153262	11/3/17	36	FEMALE	NHISPANIC	Human	stool	DUVAL
PNUSAS031707	SAMN08292384	Newport		118	2	110550	110550	11/6/17	0	FEMALE	NHISPANIC	Human	stool	ORANGE
PNUSAS031713	SAMN08292390	Javiana	JGGX01.0016	24	17	110564	110564	11/1/17	6	MALE	UNKNOWN	Human	stool	LEE
PNUSAS031711	SAMN08292388	Weltevreden		365	205	110574	153252	11/6/17	52	FEMALE	NHISPANIC	Human	stool	ST. LUCIE
PNUSAS015618	SAMN07227121	Litchfield		214	61	110737	110737	5/17/17	69	MALE	NHISPANIC	Human	stool	ST. JOHNS
PNUSAS015109	SAMN07202672	Rubislaw		1575	204	110750	110750	5/15/17	1	FEMALE	NHISPANIC	Human	stool	DUVAL
PNUSAS038661	SAMN08930218	Litchfield	JGXX01.0010	214	61	110806	110806	1/29/18	73	FEMALE	NHISPANIC	Human	stool	PALM BEACH
PNUSAS035577	SAMN08630777	Oslo		1370	257	111066	111066	1/5/18	0	FEMALE	NHISPANIC	Human	stool	HILLSBOROUGH
PNUSAS035573	SAMN08630785	London		155	237	111067	111067	1/2/18	0	MALE	NHISPANIC	Human	stool	PUTNAM
PNUSAS035575	SAMN08630781	Saintpaul	JN6X01.0048	50	14	111078	111078	1/3/18	52	MALE	NHISPANIC	Human	stool	HILLSBOROUGH
PNUSAS032574	SAMN08630797	Javiana	JGGX01.2446	24	17	111079	111079	11/6/17	0	MALE	NHISPANIC	Human	stool	BREVARD
PNUSAS032596	SAMN08630789	Rubislaw	JLPX01.0103	94	133	111087	111087	11/10/17	42	MALE	HISPANIC	Human	stool	OSCEOLA
PNUSAS038691	SAMN08930268	Rubislaw	JLPX01.0070	94	133	111089	111089	9/25/17	0	MALE	HISPANIC	Human		HILLSBOROUGH
PNUSAS035542	SAMN08774338	Rubislaw	JLPX01.0070	94	133	111089	111089	11/22/17	77	MALE	UNKNOWN	Human	stool	LEE
PNUSAS052503	SAMN09937762	Braenderup	JBPX01.0492	22	24	111411	169031	6/5/18	28	MALE	NHISPANIC	Human	stool	ORANGE
PNUSAS045115	SAMN09654872	Cubana	JDGX01.0049	2474	78	111494	111494	5/31/18	72	FEMALE	NHISPANIC	Human		VOLUSIA
PNUSAS037168	SAMN09197792	Cubana	JDGX01.0028	286	78	111502	111502	2/5/18	66	MALE	NHISPANIC	Human	stool
PNUSAS037890	SAMN08868569	Cubana	JDGX01.0028	286	78	111502	111502	2/26/18	15	FEMALE	NHISPANIC	Human	stool	ORANGE
PNUSAS036152	SAMN08772924	IV 57:z4,z23:-		433	23	111546	111546	1/18/18	0	FEMALE	HISPANIC	Human	stool	NA
PNUSAS036151	SAMN08772925	Oranienburg	JJXX01.1366	23	41	111550	111550	1/14/18	61	MALE	HISPANIC	Human
PNUSAS036142	SAMN08772917	IV 50:z4,z23:-		2053	301	111551	111551	1/8/18	0	MALE	HISPANIC	Human	BLOOD	DADE
PNUSAS036143	SAMN08772916	Infantis	JFXX01.0043	32	31	111555	111555	1/10/18	94	FEMALE	NHISPANIC	Human		BROWARD
PNUSAS035389	SAMN08772911	Weltevreden		365	205	111556	111556	10/8/17	55	FEMALE	NHISPANIC	Human	stool	BROWARD
PNUSAS036133	SAMN08772910	Sandiego		126	12	111558	111558	12/27/17	65	FEMALE	HISPANIC	Human	BLOOD	DADE
PNUSAS036150	SAMN08772926	Anatum		64	65	111585	111585	1/18/18	48	FEMALE	NHISPANIC	Human	stool	DADE
PNUSAS036161	SAMN08772952	IV 57:z4,z23:-		433	23	111660	111660	1/25/18	0	MALE	HISPANIC	Human	BLOOD	DADE
PNUSAS036137	SAMN08772907	Sandiego		126	12	111666	111666	1/2/18	0	FEMALE	NHISPANIC	Human	stool	BROWARD
PNUSAS036135	SAMN08772908	Muenchen	JJ6X01.1349	112	8	111667	111667	12/30/17	0	FEMALE	HISPANIC	Human		DADE
PNUSAS036154	SAMN08772923	IV 43:z4,z23:-		4627	NA	111681	111681	1/22/18	84	FEMALE	NHISPANIC	Human	BLOOD	DADE
PNUSAS036146	SAMN08799545	IV 40:z4,z24:-	JAAX01	2868	419	111720	111720	1/13/18	0	FEMALE	NHISPANIC	Human	stool	DADE
PNUSAS033666	SAMN08799890	Saintpaul	JN6X01.0048	50	14	111772	111772	11/14/17	70	MALE	UNKNOWN	Human	stool	OSCEOLA
PNUSAS035552	SAMN08774331	Muenchen		112	8	111792	111792	11/22/17	0	FEMALE	HISPANIC	Human	stool	HILLSBOROUGH
PNUSAS035532	SAMN08799886	Muenchen		112	8	111792	111792	11/24/17	63	MALE	UNKNOWN	Human	stool	HILLSBOROUGH
PNUSAS035531	SAMN08799887	Muenchen		112	8	111792	111792	11/22/17	31	MALE	UNKNOWN	Human	stool	HILLSBOROUGH
PNUSAS037769	SAMN08815103	Hadar	TDKX01.0126	33	22	111853	114772	2/5/18	80	FEMALE	UNKNOWN	Human	stool	PINELLAS
PNUSAS040569	SAMN09197809	Baildon		2166	399	113303	120522	3/14/18	43	FEMALE	UNKNOWN	Human	stool	PALM BEACH
PNUSAS035546	SAMN08774334	Newport	JJPX01.1477	118	2	113455	113455	11/22/17	25	FEMALE	NHISPANIC	Human	stool	SARASOTA
PNUSAS042170	SAMN09379927	Enteritidis	JEGX01.0021	11	4	113645	119269	4/14/18	70	FEMALE	HISPANIC	Human		DADE
PNUSAS038666	SAMN08955938	Saintpaul		50	14	113786	117490	2/5/18	81	FEMALE	UNKNOWN	Human	stool	NA
PNUSAS051002	SAMN09848087	Anatum	JFXX01.1080	64	65	113869	169291	6/22/18	0	FEMALE	HISPANIC	Human	stool	DADE
PNUSAS035445	SAMN08622697	Enteritidis	JLXX01.0354	11	4	113871	181953	11/22/17	27	FEMALE	HISPANIC	Human	stool	DADE
PNUSAS035539	SAMN08774341	Javiana	JGGX01.0012	24	17	113914	113914	11/25/17	0	MALE	NHISPANIC	Human	stool	NASSAU
PNUSAS033684	SAMN08774321	Bochum	JPXX01.3492	101	393	113916	113916	11/18/17	0	MALE	NHISPANIC	Human	stool
PNUSAS033672	SAMN08774312	Newport	JJPX01.0438	118	2	113919	113919	11/7/17	0	FEMALE	NHISPANIC	Human	stool
PNUSAS033671	SAMN08774313	Braenderup	JBPX01.0002	22	24	113920	113920	11/6/17	66	MALE	NHISPANIC	Human	stool	HILLSBOROUGH
PNUSAS033674	SAMN08774310	Saintpaul	JN6X01.0044	95	209	113922	113922	11/15/17	0	MALE	NHISPANIC	Human	stool	LEE
PNUSAS033673	SAMN08774311	I 4,[5],12:b:-|Schleissheim		2397	NA	113924	113924	11/17/17	61	MALE	UNKNOWN	Human		HILLSBOROUGH
PNUSAS033676	SAMN08774308	Newport	JJPX01.0036	118	2	113925	113925	11/16/17	2	FEMALE	NHISPANIC	Human	stool	PASCO
PNUSAS035553	SAMN08774330	Newport	JJPX01.0038	118	2	113949	113949	11/24/17	80	FEMALE	HISPANIC	Human	stool	OSCEOLA
PNUSAS035535	SAMN08774327	Newport	JJPX01.0036	118	2	113949	113949	11/24/17	81	FEMALE	UNKNOWN	Human	stool	VOLUSIA
PNUSAS035550	SAMN08815097	Newport	JJPX01.0036	118	2	113949	113949	11/24/17	0	MALE	NHISPANIC	Human	stool	ALACHUA
PNUSAS035563	SAMN08774349	Oranienburg	JJXX01.1157	23	41	113950	113950	11/30/17	17	MALE	UNKNOWN	Human	stool	DADE
PNUSAS035547	SAMN08774333	Bareilly	JAPX01.0064	2553	382	113951	113951	11/24/17	0	MALE	UNKNOWN	Human	stool	SEMINOLE
PNUSAS035566	SAMN08774346	Newport	JJPX01.0438	118	2	113952	113952	11/27/17	0	FEMALE	HISPANIC	Human	stool	SEMINOLE
PNUSAS035537	SAMN08774343	Oranienburg	JJXX01.0028	23	41	113953	113953	11/25/17	2	MALE	UNKNOWN	Human	stool	HIGHLANDS
PNUSAS035536	SAMN08774344	Typhimurium	JPXX01.4976	19	1	113954	113954	11/22/17	54	FEMALE	UNKNOWN	Human	stool	BREVARD
PNUSAS042172	SAMN09379925	Matadi		4643	443	114133	124713	5/18/18	10	MALE	HISPANIC	Human		DADE
PNUSAS035569	SAMN08815089	Montevideo	JIXX01.0027	81	40	114753	114753	1/18/18	0	MALE	NHISPANIC	Human		LEON
PNUSAS037759	SAMN08815113	IIIb 8:r:z|IIIb (6),14:r:z|IIIb 17:r:z|IIIb 18:r:z|IIIb 21:r:z|IIIb 35:r:z|IIIb 38:r:z:[z57]|IIIb 42:r:z|IIIb 43:r:z|IIIb 47:r:z|IIIb 48:r:z|IIIb 50:r:z:[z67]|IIIb 53:r:z|IIIb 58:r:z|IIIb 60:r:z|IIIb 61:r:z		4649	220	114769	114769	1/3/18	69	MALE	NHISPANIC	Human	stool	INDIAN RIVER
PNUSAS037760	SAMN08815112	Montevideo	JIXX01.0742	81	40	114770	114770	1/24/18	5	MALE	UNKNOWN	Human	stool	ST. LUCIE
PNUSAS037762	SAMN08815110	Montevideo	JIXX01.0742	81	40	114770	114770	1/24/18	71	FEMALE	UNKNOWN	Human	stool	VOLUSIA
PNUSAS037768	SAMN08815104	Saintpaul	JN6X01.0635	50	14	114771	114771	1/24/18	41	FEMALE	UNKNOWN	Human	stool	PALM BEACH
PNUSAS037761	SAMN08815111	Javiana	JGGX01.0013	24	17	114773	114773	1/25/18	0	FEMALE	HISPANIC	Human	stool	ST. JOHNS
PNUSAS037766	SAMN08815106	Braenderup	JBPX01.0169	22	24	114774	114774	1/24/18	20	FEMALE	UNKNOWN	Human	stool	PALM BEACH
PNUSAS037763	SAMN08815109	Oranienburg	JJXX01.0028	23	41	114775	114775	1/26/18	54	FEMALE	UNKNOWN	Human	stool	LAKE
PNUSAS037764	SAMN08815108	Rubislaw	JLPX01.0059	94	133	114781	114781	1/26/18	0	MALE	NHISPANIC	Human	stool	SANTA ROSA
PNUSAS028783	SAMN08916258	Anatum	JAGX01.0016	64	65	115115	115115	9/26/17	0	MALE	NHISPANIC	Human	stool	POLK
PNUSAS035562	SAMN08774350	IV 48:z4,z32:-		2058	23	115487	115487	11/29/17	0	FEMALE	HISPANIC	Human	stool	DADE
PNUSAS035545	SAMN08774335	Sandiego		126	12	115488	115488	11/22/17	76	MALE	NHISPANIC	Human	stool	HILLSBOROUGH
PNUSAS035543	SAMN08774337	Javiana	JGGX01.0012	24	17	115489	115489	11/22/17	1	FEMALE	NHISPANIC	Human	stool	DUVAL
PNUSAS042177	SAMN09293595	IV 50:z4,z23:-		2053	301	115490	115490	2/19/18	71	MALE	NHISPANIC	Human	stool	MANATEE
PNUSAS035551	SAMN08774332	Javiana	JGGX01.0012	24	17	115492	115492	11/24/17	0	MALE	NHISPANIC	Human	stool	DUVAL
PNUSAS035538	SAMN08774342	Muenchen		83	248	115493	115493	11/24/17	11	FEMALE	UNKNOWN	Human	stool	ORANGE
PNUSAS035541	SAMN08774339	Sandiego		126	12	115494	115494	11/26/17	1	MALE	NHISPANIC	Human	stool	DUVAL
PNUSAS033685	SAMN08774320	Braenderup	JBPX01.0126	22	24	115498	115498	11/17/17	1	MALE	HISPANIC	Human	stool	LAKE
PNUSAS033678	SAMN08774324	Javiana	JGGX01.0094	4652	17	115499	115499	11/17/17	1	MALE	NHISPANIC	Human	stool	DUVAL
PNUSAS033804	SAMN08639136	Saintpaul	JN6X01.0044	95	209	115502	182303	11/17/17	4	MALE	UNKNOWN	Human	stool	ORANGE
PNUSAS033680	SAMN08774323	Saintpaul	JN6X01.0044	95	209	115502	115502	11/17/17	55	FEMALE	HISPANIC	Human	stool	OSCEOLA
PNUSAS033681	SAMN08774322	Saintpaul	JN6X01.0044	95	209	115502	115502	11/17/17	14	MALE	UNKNOWN	Human	stool	LEON
PNUSAS036153	SAMN08824572	Aberdeen		2262	304	116474	116474	1/22/18	59	MALE	UNKNOWN	Human	stool	NA
PNUSAS028782	SAMN08916243	Anatum	JAGX01.0016	64	65	116499	116499	9/7/17	70	FEMALE	NHISPANIC	Human	stool	MARION
PNUSAS038683	SAMN08930233	Takoradi		555	359.1	116922	116922	1/29/18	0	MALE	UNKNOWN	Human	stool	MARTIN
PNUSAS038688	SAMN08930229	Sandiego	JLXX01.0748	126	12	116924	116924	9/26/17	0	MALE	NHISPANIC	Human	stool	BREVARD
PNUSAS038327	SAMN08930228	IV 50:z4,z23:-		2053	301	116926	116926	11/1/17	66	MALE	NHISPANIC	Human	BLOOD	CLAY
PNUSAS038662	SAMN08930217	Oranienburg		1392	203	116939	116939	2/2/18	1	MALE	HISPANIC	Human	stool	DADE
PNUSAS038680	SAMN08930236	IV 44:z4,z23:-		433	23	116940	116940	1/26/18	0	MALE	NHISPANIC	Human	stool	PALM BEACH
PNUSAS038687	SAMN08930230	Newport	JJPX01.0092	118	2	116942	116942	9/21/17	1	FEMALE	HISPANIC	Human	stool	MANATEE
PNUSAS038675	SAMN08930240	I 4,[5],12:i:-	JPXX01.2790	34	1	116946	116946	1/25/18	0	MALE	NHISPANIC	Human	stool	PASCO
PNUSAS038685	SAMN08930232	Anatum	JAGX01.0004	64	65	116948	116948	1/30/18	0	MALE	NHISPANIC	Human	stool	PALM BEACH
PNUSAS039199	SAMN08963948	Anatum	JAGX01.0004	64	65	116948	116948	2/20/18	0	MALE	HISPANIC	Human	stool	PALM BEACH
PNUSAS038702	SAMN08930260	Nima	LXRX01.0007	2258	NA	116961	116961	9/22/17	0	MALE	NHISPANIC	Human	stool
PNUSAS038699	SAMN08930263	Anatum	JAGX01.0013	64	65	116962	116962	9/26/17	60	MALE	UNKNOWN	Human	stool	SUMTER
PNUSAS038695	SAMN08930266	Litchfield	JGXX01.0049	214	61	116963	116963	9/23/17	0	MALE	HISPANIC	Human		OSCEOLA
PNUSAS038704	SAMN08930279	Manhattan		18	27	116964	116964	9/22/17	10	MALE	NHISPANIC	Human	stool	BREVARD
PNUSAS038713	SAMN08930275	Bovismorbificans		150	289	116965	116965	9/26/17	42	MALE	NHISPANIC	Human	stool	DUVAL
PNUSAS038710	SAMN08930276	Carrau		226	131	116966	116966	9/22/17	0	FEMALE	NHISPANIC	Human	stool
PNUSAS038709	SAMN08930277	Newport	JJPX01.0041	5	2	116986	116986	9/22/17	0	FEMALE	HISPANIC	Human	stool	HILLSBOROUGH
PNUSAS038703	SAMN08930259	Rubislaw	JLPX01.0076	94	133	116987	116987	9/22/17	28	MALE	HISPANIC	Human	stool	HILLSBOROUGH
PNUSAS038333	SAMN08930271	Baildon		2166	399	116989	116989	2/4/18	0	MALE	NHISPANIC	Human	stool	PASCO
PNUSAS038696	SAMN08930265	Braenderup	JBPX01.0182	22	24	116992	116992	9/25/17	7	FEMALE	NHISPANIC	Human		HILLSBOROUGH
PNUSAS038701	SAMN08930261	Muenchen		1567	8	116993	116993	9/26/17	0	MALE	UNKNOWN	Human	stool	LEE
PNUSAS038712	SAMN08955957	Newport	JJPX01.2933	118	2	117478	117478	9/22/17	1	MALE	NHISPANIC	Human	stool	LEE
PNUSAS038708	SAMN08955959	Reading		93	43	117479	117479	9/19/17	73	FEMALE	NHISPANIC	Human	stool	LEE
PNUSAS038705	SAMN08955961	Javiana	JGGX01.0092	24	17	117480	117480	9/22/17	7	MALE	NHISPANIC	Human	stool	HILLSBOROUGH
PNUSAS038744	SAMN08955955	Fluntern	FLUX01.0003	1456	319	117482	117482	2/27/18	18	FEMALE	NHISPANIC	Human		NASSAU
PNUSAS038714	SAMN08955956	Newport	JJPX01.0235	118	2	117484	117484	9/19/17	1	MALE	HISPANIC	Human	stool	LEE
PNUSAS038692	SAMN08955951	Javiana	JGGX01.0012	24	17	117486	117486	9/22/17	0	FEMALE	NHISPANIC	Human	stool	DUVAL
PNUSAS038694	SAMN08955963	Sandiego		126	12	117487	117487	9/23/17	1	MALE	NHISPANIC	Human	stool	HILLSBOROUGH
PNUSAS038698	SAMN08955962	Javiana	JGGX01.0242	24	17	117488	117488	9/27/17	0	FEMALE	NHISPANIC	Human	stool	HILLSBOROUGH
PNUSAS038684	SAMN08955948	Javiana	JGGX01.0366	1674	17	117489	117489	1/29/18	1	MALE	NHISPANIC	Human	stool	BROWARD
PNUSAS038328	SAMN08930227	Typhimurium	JPXX01.1800	19	1	117625	117625	3/1/18	60	FEMALE	NHISPANIC	Human	BLOOD	DUVAL
PNUSAS039994	SAMN09091277	I 4,[5],12:i:-	JPXX01.1045	19	1	117636	117636	2/7/18	24	FEMALE	NHISPANIC	Human	stool	PALM BEACH
PNUSAS038331	SAMN08930273	I 4,[5],12:i:-	JPXX01.1045	19	1	117636	117636	2/6/18	27	FEMALE	UNKNOWN	Human	stool	ORANGE
PNUSAS038334	SAMN08930270	Newport	JJPX01.0036	118	2	117638	117638	2/5/18	8	FEMALE	NHISPANIC	Human		PINELLAS
PNUSAS038700	SAMN08930262	Montevideo	JIXX01.0140	4	40	117639	117639	9/26/17	71	MALE	UNKNOWN	Human	stool	LEE
PNUSAS038715	SAMN08930274	Javiana	JGGX01.0915	24	17	117641	117641	9/20/17	66	FEMALE	NHISPANIC	Human	stool	PINELLAS
PNUSAS038707	SAMN08930278	Typhimurium	JPXX01.0009	19	1	117643	117643	9/19/17	4	MALE	NHISPANIC	Human	stool	SANTA ROSA
PNUSAS038679	SAMN08930237	Bareilly	JAPX01.1484	2553	382	117647	117647	1/26/18	70	FEMALE	HISPANIC	Human	stool	PALM BEACH
PNUSAS038682	SAMN08930234	Baildon		2166	399	117648	117648	1/26/18	1	MALE	HISPANIC	Human	stool	BROWARD
PNUSAS038686	SAMN08930231	Braenderup	JBPX01.1107	22	24	117650	117650	1/30/18	66	MALE	NHISPANIC	Human	stool	COLLIER
PNUSAS039196	SAMN08963951	Oranienburg	JJXX01.0027	1675	41	117711	117711	2/15/18	4	MALE	NHISPANIC	Human	stool	PALM BEACH
PNUSAS039203	SAMN08963969	Sandiego		126	12	117715	117715	2/22/18	1	MALE	HISPANIC	Human	stool	BROWARD
PNUSAS039215	SAMN08963957	Poona	JL6X01.0473	964	315	117716	117716	3/4/18	77	MALE	HISPANIC	Human	stool	DADE
PNUSAS039205	SAMN08963967	Poona	JL6X01.0542	964	315	117717	117717	2/25/18	0	MALE	NHISPANIC	Human	stool	BROWARD
PNUSAS040565	SAMN09221861	Sandiego		126	12	117720	117720	3/15/18	65	MALE	UNKNOWN	Human	stool	BROWARD
PNUSAS039208	SAMN08963964	Muenchen	JJ6X01.1349	112	8	117721	117721	2/24/18	6	MALE	NHISPANIC	Human	stool	DADE
PNUSAS039204	SAMN08963968	Typhimurium	JPXX01.0958	313	1	117723	117723	3/1/18	80	FEMALE	HISPANIC	Human	BLOOD	DADE
PNUSAS039197	SAMN08963950	Braenderup	JBPX01.0104	22	24	117725	117725	2/16/18	1	FEMALE	NHISPANIC	Human	stool	DADE
PNUSAS039195	SAMN08963952	Montevideo	JIXX01.0140	195	40	117726	117726	2/15/18	2	FEMALE	NHISPANIC	Human	stool	PALM BEACH
PNUSAS039214	SAMN08963958	Abaetetuba		2041	273	117762	117762	2/27/18	0	FEMALE	HISPANIC	Human	stool	PALM BEACH
PNUSAS039211	SAMN08963961	Anatum	JAGX01.0001	64	65	117763	117763	2/26/18	1	FEMALE	HISPANIC	Human	stool	DADE
PNUSAS039200	SAMN08963972	Litchfield	JGXX01.0108	214	61	117764	117764	2/20/18	33	MALE	HISPANIC	Human	stool	COLLIER
PNUSAS046225	SAMN09655015	Panama	JKGX01.0153	48	42	117798	117798	4/27/18	35	FEMALE	NHISPANIC	Human	stool	BROWARD
PNUSAS039209	SAMN08963963	Montevideo	JIXX01.0140	4	40	118138	118138	2/27/18	5	FEMALE	UNKNOWN	Human	stool	DADE
PNUSAS039202	SAMN08963970	Sandiego	JLXX01.0121	126	12	118143	118143	2/21/18	0	FEMALE	NHISPANIC	Human	stool	BROWARD
PNUSAS047148	SAMN09696052	Mbandaka	TDRX01.0004	413	62	118239	118239	6/5/18	94	FEMALE	NHISPANIC	Human	stool	OKALOOSA
PNUSAS046236	SAMN09655083	Mbandaka	TDRX01.0004	413	62	118239	118239	5/30/18	54	FEMALE	NHISPANIC	Human	stool	ORANGE
PNUSAS045299	SAMN09551940	I 4,[5],12:i:-	JPXX01.0859	19	1	118459	133014	5/15/18	77	MALE	NHISPANIC	Human	stool	MANATEE
PNUSAS039998	SAMN09044181	Schwarzengrund	JM6X01.0430	96	33	118483	119441	2/23/18	74	FEMALE	NHISPANIC	Human	stool	PALM BEACH
PNUSAS040003	SAMN09044192	Poona		964	315	119439	119439	1/25/18	0	FEMALE	NHISPANIC	Human	stool	DADE
PNUSAS039997	SAMN09044169	Wien		4728	NA	119444	119444	2/8/18	0	FEMALE	NHISPANIC	Human	stool	PALM BEACH
PNUSAS039996	SAMN09044170	Chester		411	49	119446	119446	2/8/18	0	MALE	HISPANIC	Human	stool	BROWARD
PNUSAS040004	SAMN09044191	Enteritidis	JEGX01.0004	11	4	119451	119451	1/27/18	3	MALE	UNKNOWN	Human	stool	DADE
PNUSAS040568	SAMN09221860	Weltevreden		365	205	120205	121928	3/19/18	23	FEMALE	UNKNOWN	Human	stool	COLLIER
PNUSAS040013	SAMN09101205	IIIb 60:r:e,n,x,z15		63	225	120406	120406	3/9/18	7	MALE	HISPANIC	Human	stool	DADE
PNUSAS040007	SAMN09101211	Typhimurium	JPXX01.1278	19	1	120408	120408	3/5/18	62	MALE	HISPANIC	Human	BLOOD	DADE
PNUSAS040011	SAMN09101207	Gaminara		2152	245	120412	120412	3/10/18	2	MALE	HISPANIC	Human	stool	DADE
PNUSAS040008	SAMN09101210	Oranienburg		23	41	120413	120413	3/5/18	0	FEMALE	HISPANIC	Human	BLOOD	DADE
PNUSAS040599	SAMN09197804	Rubislaw	JLPX01.0059	94	133	120516	120516	2/2/18	0	MALE	UNKNOWN	Human	stool	BAY
PNUSAS040597	SAMN09197806	Rubislaw	JLPX01.0059	94	133	120516	120516	2/2/18	55	FEMALE	NHISPANIC	Human	stool	ST. LUCIE
PNUSAS040600	SAMN09197803	Rubislaw	JLPX01.0059	94	133	120516	120516	2/2/18	33	FEMALE	UNKNOWN	Human	stool	DUVAL
PNUSAS040012	SAMN09101206	Braenderup	JBPX01.0287	22	24	120562	120562	1/4/18	78	FEMALE	UNKNOWN	Human		DADE
PNUSAS040562	SAMN09206701	Minnesota		548	77	120710	120710	3/14/18	3	MALE	NHISPANIC	Human	stool	PALM BEACH
PNUSAS040579	SAMN09206692	Poona	JL6X01.0542	964	315	120713	120713	3/21/18	0	MALE	NHISPANIC	Human	stool	BROWARD
PNUSAS040575	SAMN09206695	IV 48:g,z51:-		782	23	120725	120725	3/21/18	5	MALE	NHISPANIC	Human	BLOOD	BROWARD
PNUSAS040585	SAMN09206712	Poona		964	315	120729	120729	3/27/18	7	MALE	HISPANIC	Human	stool	BROWARD
PNUSAS040578	SAMN09206693	Newport		45	3	120730	120730	3/19/18	2	FEMALE	NHISPANIC	Human	stool	PALM BEACH
PNUSAS040581	SAMN09206716	Agona	JABX01.0555	13	54	120731	120731	3/18/18	40		UNKNOWN	Human	stool	NA
PNUSAS040582	SAMN09206715	Newport	JJPX01.3716	46	3	120732	120732	3/21/18	1	MALE	NHISPANIC	Human	stool	BROWARD
PNUSAS040593	SAMN09206706	IIIb 38:l,v:z50		644	220	120733	120733	4/5/18	1	MALE	HISPANIC	Human	BLOOD	DADE
PNUSAS040573	SAMN09206697	Enteritidis	JEGX01.0054	11	4	120735	120735	3/19/18	40	FEMALE	NHISPANIC	Human	stool	BROWARD
PNUSAS040027	SAMN09206703	Urbana		754	38	120738	120738	3/16/18	0	MALE	HISPANIC	Human	stool	BROWARD
PNUSAS040026	SAMN09206704	Schwarzengrund	JM6X01.0049	96	33	120739	120739	3/9/18	5	MALE	HISPANIC	Human		PALM BEACH
PNUSAS040574	SAMN09206696	Baildon		2166	399	120761	120761	8/9/18	49	MALE	NHISPANIC	Human	stool	DADE
PNUSAS040592	SAMN09206707	Urbana		754	38	120763	120763	4/2/18	7	MALE	HISPANIC	Human	stool	DADE
PNUSAS040576	SAMN09206694	Sandiego	JLXX01.0662	126	12	120764	120764	3/22/18	38	FEMALE	NHISPANIC	Human	stool	BROWARD
PNUSAS041184	SAMN09283843	Enteritidis	JEGX01.0002	11	4	123036	123036	4/2/18	2	MALE	HISPANIC	Human	stool	DADE
PNUSAS055167	SAMN10095864	Adelaide	TDAX01.0164	440	82	123333	123333	5/29/18	66	FEMALE	NHISPANIC	Human	stool	MANATEE
PNUSAS041185	SAMN09283842	IV 50:g,z51:-		1209	23	123518	123518	4/2/18	62	FEMALE	NHISPANIC	Human	stool
PNUSAS041183	SAMN09283844	Saintpaul	JN6X01.0099	50	14	123519	123519	3/31/18	0	MALE	HISPANIC	Human	stool	BROWARD
PNUSAS042182	SAMN09429116	Oranienburg	JJXX01.0028	23	41	123772	123772	2/19/18	59	MALE	UNKNOWN	Human	stool	MARION
PNUSAS042178	SAMN09293757	Oranienburg	JJXX01.0028	23	41	123772	123772	2/19/18	45	MALE	NHISPANIC	Human	stool	HILLSBOROUGH
PNUSAS042187	SAMN09293727	Heidelberg	JF6X01.0058	15	26	123774	123774	2/16/18	1	FEMALE	NHISPANIC	Human	stool	ST. LUCIE
PNUSAS042196	SAMN09293602	Manhattan		18	27	123776	123776	4/4/18	0	MALE	HISPANIC	Human	stool	BROWARD
PNUSAS042181	SAMN09293748	Newport	JJPX01.0032	118	2	123794	123794	2/17/18	1	MALE	NHISPANIC	Human	stool	ALACHUA
PNUSAS042186	SAMN09293732	Braenderup	JBPX01.0039	22	24	123795	123795	2/17/18	0	MALE	NHISPANIC	Human	stool	ST. LUCIE
PNUSAS042175	SAMN09379943	Typhimurium	JPXX01.2399	19	1	123796	123796	4/5/18	58	FEMALE	NHISPANIC	Human	stool	PALM BEACH
PNUSAS042197	SAMN09293599	Typhimurium		19	1	123796	123796	4/5/18	56	MALE	NHISPANIC	Human	stool	PALM BEACH
PNUSAS044530	SAMN09510603	Stanley		29	29	124225	124225	5/23/18	18	FEMALE	UNKNOWN	Human	stool	ORANGE
PNUSAS042171	SAMN09379926	Rubislaw		1575	204	124671	124671	5/18/18	2	MALE	HISPANIC	Human	BLOOD	DADE
PNUSAS042174	SAMN09379944	Montevideo	JIXX01.0024	699	40	124672	124672	4/5/18	2	MALE	HISPANIC	Human	stool	BROWARD
PNUSAS042189	SAMN09379940	Brandenburg		65	12	124674	124674	2/13/18	17	FEMALE	HISPANIC	Human	stool	HILLSBOROUGH
PNUSAS042188	SAMN09379941	Sendai		80	111	124676	124676	2/15/18	2	FEMALE	UNKNOWN	Human	stool	BREVARD
PNUSAS042198	SAMN09379933	IV 50:z4,z23:-		2053	301	124677	124677	4/7/18	0	FEMALE	HISPANIC	Human		BROWARD
PNUSAS042658	SAMN09379949	Paratyphi B var. Java	JKXX01.0737	127	19	124697	124697	2/27/18	15	MALE	UNKNOWN	Human	stool	LAKE
PNUSAS042659	SAMN09379948	Newport		118	2	124699	124699	2/26/18	65	MALE	NHISPANIC	Human		SANTA ROSA
PNUSAS042168	SAMN09379929	Newport	JJPX01.1466	45	3	124700	124700	5/18/18	23	MALE	NHISPANIC	Human		DADE
PNUSAS042194	SAMN09379950	Kentucky	JGPX01.0210	152	15	124706	124706	2/25/18	34	FEMALE	UNKNOWN	Human	stool	BREVARD
PNUSAS042191	SAMN09379953	Saintpaul	JN6X01.0321	95	209	124707	124707	2/15/18	84	FEMALE	UNKNOWN	Human		POLK
PNUSAS042169	SAMN09379928	Typhimurium		19	1	124709	124709	4/10/18	8	MALE	HISPANIC	Human	stool
PNUSAS042190	SAMN09379939	Thompson	JP6X01.0167	26	28	124711	124711	2/15/18	36	MALE	UNKNOWN	Human	stool	ORANGE
PNUSAS042165	SAMN09379931	Urbana		754	38	124712	124712	4/5/18	0	FEMALE	NHISPANIC	Human	stool	BROWARD
PNUSAS042193	SAMN09379951	Braenderup	JBPX01.0039	22	24	124725	124725	2/20/18	0	FEMALE	UNKNOWN	Human	stool	SEMINOLE
PNUSAS041785	SAMN09374770	Braenderup	JBPX01.0002	22	24	124783	124783	3/18/18	19	FEMALE	HISPANIC	Human	stool	MARTIN
PNUSAS041787	SAMN09374781	Braenderup	JBPX01.0002	22	24	124808	124808	4/4/18	16	FEMALE	NHISPANIC	Human		HILLSBOROUGH
PNUSAS041792	SAMN09374787	Braenderup	JBPX01.0002	22	24	124810	124810	4/10/18	1	MALE	NHISPANIC	Human	stool	LEE
PNUSAS044187	SAMN09462513	Braenderup	JBPX01.0002	22	24	124886	124886	5/9/18	39	MALE	NHISPANIC	Human	stool	HILLSBOROUGH
PNUSAS045288	SAMN09537495	Braenderup	JBPX01.0002	22	24	124886	124886	5/11/18	58	FEMALE	UNKNOWN	Human	stool	NA
PNUSAS043554	SAMN09430463	Paratyphi B var. Java	JKXX01.0116	88	19	125866	125866	3/28/18	76	MALE	NHISPANIC	Human		MANATEE
PNUSAS046228	SAMN09655125	Give		516	67	125996	137601	5/3/18	70	FEMALE	HISPANIC	Human	stool	DADE
PNUSAS043536	SAMN09430434	Javiana	JGGX01.0012	24	17	127322	127322	3/14/18	0	MALE	NHISPANIC	Human	stool	DUVAL
PNUSAS043534	SAMN09430436	Javiana	JGGX01.0012	24	17	127322	127322	3/14/18	13	MALE	UNKNOWN	Human	stool	DUVAL
PNUSAS044936	SAMN09650520	Javiana	JGGX01.0012	24	17	127322	127322	3/14/18	3	MALE	NHISPANIC	Human	stool	ALACHUA
PNUSAS044934	SAMN09650522	Javiana	JGGX01.0012	24	17	127322	127322	3/14/18	8	FEMALE	NHISPANIC	Human	stool	SARASOTA
PNUSAS043543	SAMN09430454	Typhimurium	JPXX01.0003	19	1	127343	127343	4/2/18	81	MALE	NHISPANIC	Human		HILLSBOROUGH
PNUSAS043544	SAMN09430453	I 4,[5],12:i:-		34	1	127345	127345	3/30/18	17	MALE	UNKNOWN	Human	stool	ORANGE
PNUSAS043546	SAMN09430451	Sandiego	JLXX01.0354	126	12	127347	127347	3/29/18	4	FEMALE	NHISPANIC	Human	stool	SEMINOLE
PNUSAS043550	SAMN09430447	Sandiego	JLXX01.0176	126	12	127347	127347	3/29/18	4	FEMALE	NHISPANIC	Human	stool	SEMINOLE
PNUSAS043545	SAMN09430452	Kentucky	JGPX01.0134	198	56	127349	127349	3/29/18	57	FEMALE	NHISPANIC	Human	stool	HILLSBOROUGH
PNUSAS043542	SAMN09430455	Oranienburg	JJXX01.0027	1675	41	127351	127351	4/2/18	11	FEMALE	NHISPANIC	Human		LEE
PNUSAS043541	SAMN09430456	Mbandaka	TDRX01.0087	413	62	127352	127352	3/27/18	74	FEMALE	UNKNOWN	Human		SUMTER
PNUSAS043540	SAMN09430457	Typhimurium	JPXX01.5041	19	1	127353	127353	3/6/18	33	MALE	NHISPANIC	Human		SARASOTA
PNUSAS042167	SAMN09430438	Gatuni|Konstanz		225	427	127354	127354	4/11/18	75	FEMALE	HISPANIC	Human		DADE
PNUSAS043551	SAMN09430446	Sandiego		126	12	127357	127357	3/29/18	3	FEMALE	NHISPANIC	Human	stool	SARASOTA
PNUSAS043539	SAMN09430459	Give		654	239	127359	127359	3/19/18	66	FEMALE	NHISPANIC	Human		SARASOTA
PNUSAS043537	SAMN09430461	Nima		1254	445	127360	127360	3/22/18	2	MALE	NHISPANIC	Human	stool	INDIAN RIVER
PNUSAS042660	SAMN09430437	Typhimurium		19	1	127365	127365	2/27/18	47	FEMALE	NHISPANIC	Human		VOLUSIA
PNUSAS043555	SAMN09430465	Tallahassee		735	328.2	127404	127404	3/31/18	0	FEMALE	UNKNOWN	Human	stool	ORANGE
PNUSAS044186	SAMN09462514	Stanley		29	29	128896	128896	5/9/18	1	MALE	HISPANIC	Human	stool	HILLSBOROUGH
PNUSAS044182	SAMN09462509	Newport	JJPX01.0678	118	2	128906	128906	5/8/18	0	MALE	NHISPANIC	Human	stool	MARION
PNUSAS044180	SAMN09462500	Muenchen	JJ6X01.4031	112	8	128914	128914	5/7/18	0	FEMALE	NHISPANIC	Human	stool	HILLSBOROUGH
PNUSAS044178	SAMN09462501	Sandiego	JLXX01.0743	126	12	128917	128917	5/9/18	64	FEMALE	NHISPANIC	Human	stool	SARASOTA
PNUSAS044183	SAMN09462508	Newport	JJPX01.0041	5	2	128939	128939	5/8/18	2	FEMALE	HISPANIC	Human	stool	FLAGLER
PNUSAS044184	SAMN09462507	Newport	JJPX01.0105	118	2	128940	128940	5/8/18	68	MALE	NHISPANIC	Human		COLUMBIA
PNUSAS044185	SAMN09462515	Rubislaw	JLPX01.0059	94	133	128941	128941	5/8/18	0	MALE	NHISPANIC	Human	stool	MARION
PNUSAS044190	SAMN09466777	IV 50:z4,z23:-		2053	301	129204	129204	5/8/18	0	MALE	NHISPANIC	Human	stool	PINELLAS
PNUSAS045296	SAMN09545753	IV 50:z4,z23:-		2053	301	129204	129204	5/8/18	41	FEMALE	NHISPANIC	Human	stool	PINELLAS
PNUSAS055168	SAMN10095896	Braenderup	JBPX01.0002	22	24	129456	129456	5/25/18	19	MALE	NHISPANIC	Human	stool	CHARLOTTE
PNUSAS045287	SAMN09537504	Muenchen		83	248	131004	131004	5/11/18	39	FEMALE	NHISPANIC	Human		CHARLOTTE
PNUSAS044179	SAMN09501085	IV 50:z4,z23:-		2505	301	131305	131305	5/7/18	0	FEMALE	NHISPANIC	Human	stool	ORANGE
PNUSAS044560	SAMN09501086	Weltevreden		365	205	131337	131337	4/23/18	50	FEMALE	HISPANIC	Human	stool	DADE
PNUSAS044517	SAMN09510571	Saintpaul	JN6X01.0044	95	209	131528	131528	5/17/18	5	FEMALE	NHISPANIC	Human	stool	SEMINOLE
PNUSAS044521	SAMN09510579	IV 50:z4,z23:-		2053	301	131536	131536	5/18/18	0	MALE	NHISPANIC	Human	stool	HILLSBOROUGH
PNUSAS044520	SAMN09510580	IV 50:z4,z23:-		2053	301	131540	131540	5/18/18	1	FEMALE	NHISPANIC	Human	stool
PNUSAS044518	SAMN09510570	Thompson	JP6X01.0015	26	28	131544	154558	5/9/18	0	FEMALE	NHISPANIC	Human	stool	ORANGE
PNUSAS045283	SAMN09537491	Newport		45	3	132809	132809	5/6/18	0	MALE	HISPANIC	Human	stool	DADE
PNUSAS045284	SAMN09537507	Isangi		216	25	132835	132835	5/1/18	24	MALE	NHISPANIC	Human	stool	DADE
PNUSAS045290	SAMN09551922	Bochum	JPXX01.3942	101	393	132962	132962	5/11/18	82	FEMALE	NHISPANIC	Human	stool	PASCO
PNUSAS045292	SAMN09545751	Bochum	JPXX01.3492	101	393	132962	132962	5/11/18	1	MALE	NHISPANIC	Human	stool	BAY
PNUSAS045293	SAMN09545749	Bochum	JPXX01.3492	101	393	132962	132962	5/10/18	83	FEMALE	NHISPANIC	Human	stool	SUMTER
PNUSAS045295	SAMN09545748	Bochum	JPXX01.3492	101	393	132962	132962	5/11/18	11	FEMALE	UNKNOWN	Human	stool	ST. LUCIE
PNUSAS045289	SAMN09551946	Litchfield		214	61	132971	132971	5/10/18	0	MALE	NHISPANIC	Human	stool	HILLSBOROUGH
PNUSAS045294	SAMN09551883	Tallahassee		735	328.2	132973	132973	5/11/18	0	MALE	NHISPANIC	Human	stool	NASSAU
PNUSAS045291	SAMN09551900	IV 40:z4,z24:-		2868	419	133013	133013	5/11/18	0	MALE	NHISPANIC	Human	stool	SEMINOLE
PNUSAS044519	SAMN09510583	IIIb 35:z47:z35		2708	220	133267	133267	5/18/18	68	MALE	NHISPANIC	Human	stool	MARION
PNUSAS044527	SAMN09510605	Muenchen		112	8	133285	133285	5/23/18	63	FEMALE	NHISPANIC	Human		PUTNAM
PNUSAS044523	SAMN09510577	Miami		80	111	133299	133299	5/21/18	1	FEMALE	NHISPANIC	Human	stool	HILLSBOROUGH
PNUSAS046223	SAMN09655022	Muenchen		1567	8	134691	134691	5/4/18	72	MALE	HISPANIC	Human	stool	DADE
PNUSAS045285	SAMN09537506	Rubislaw	JLPX01.0539	1575	204	135872	135872	4/30/18	66	FEMALE	HISPANIC	Human	stool	DADE
PNUSAS044929	SAMN09650508	Infantis	JFXX01.0531	32	31	137031	137031	3/27/18	1	MALE	NHISPANIC	Human	stool	OKEECHOBEE
PNUSAS044927	SAMN09650510	Enteritidis		2104	NA	137036	137036	3/28/18	55	FEMALE	NHISPANIC	Human	stool	ORANGE
PNUSAS044930	SAMN09650507	Baildon		2166	399	137060	137060	3/27/18	0	MALE	NHISPANIC	Human		HILLSBOROUGH
PNUSAS044932	SAMN09650505	Tallahassee		735	328.2	137061	137061	3/14/18	2	FEMALE	NHISPANIC	Human	stool	LEE
PNUSAS055782	SAMN10139035	Typhimurium	JPXX01.0060	19	1	137193	166962	7/11/18	5	FEMALE	HISPANIC	Human	stool	DADE
PNUSAS046224	SAMN09655019	Newport	JJPX01.0413	45	3	137600	137600	5/31/18	1	FEMALE	HISPANIC	Human	stool	BROWARD
PNUSAS046232	SAMN09655108	Poona	JL6X01.0826	964	315	137602	137645	5/2/18	1	FEMALE	NHISPANIC	Human	stool	PALM BEACH
PNUSAS046215	SAMN09654915	Poona		964	315	137602	137602	4/20/18	0	FEMALE	HISPANIC	Human	stool	PALM BEACH
PNUSAS046210	SAMN09654856	Sandiego	JLXX01.0812	126	12	137608	137608	4/19/18	5	MALE	NHISPANIC	Human	stool	BROWARD
PNUSAS046214	SAMN09654919	Sandiego		126	12	137609	137609	4/20/18	52	MALE	NHISPANIC	Human	stool	BROWARD
PNUSAS046208	SAMN09654865	Braenderup	JBPX01.0101	22	24	137618	137618	4/21/18	46	MALE	NHISPANIC	Human	stool	DADE
PNUSAS046213	SAMN09654924	IV 50:z4,z23:-		2053	301	137622	137622	4/19/18	4	MALE	NHISPANIC	Human	stool	BROWARD
PNUSAS046222	SAMN09655024	Newport	JJPX01.0378	118	2	137641	137641	4/25/18	69	FEMALE	NHISPANIC	Human	stool	COLLIER
PNUSAS046235	SAMN09655095	Urbana		754	38	137643	137643	5/7/18	1	MALE	HISPANIC	Human	stool	BROWARD
PNUSAS046233	SAMN09655103	Anatum		64	65	137646	137646	5/4/18	36	FEMALE	HISPANIC	Human	stool	DADE
PNUSAS046230	SAMN09655118	Urbana		754	38	137651	137651	5/2/18	1	MALE	NHISPANIC	Human	stool	BROWARD
PNUSAS046227	SAMN09655129	Richmond		909	206	137652	137652	5/1/18	2	FEMALE	HISPANIC	Human	stool	NA
PNUSAS046229	SAMN09655122	IIIb 47:k:z35		1195	220	137654	137654	5/4/18	60	FEMALE	HISPANIC	Human	stool	BROWARD
PNUSAS046226	SAMN09655013	Schwarzengrund	JM6X01.0214	96	33	137676	137676	5/1/18	65	FEMALE	HISPANIC	Human	stool	BROWARD
PNUSAS046219	SAMN09655067	IV 48:z4,z32:-		2058	23	137682	137682	4/24/18	77	MALE	NHISPANIC	Human	stool	PALM BEACH
PNUSAS033669	SAMN08709339	Newport	JJPX01.0384	118	2	152392	152392	11/14/17	22	FEMALE	NHISPANIC	Human	stool	ESCAMBIA
PNUSAS035555	SAMN08638900	Rubislaw		1575	204	152394	152394	11/22/17	0	MALE	NHISPANIC	Human	stool	HILLSBOROUGH
PNUSAS032597	SAMN08638871	Saintpaul	JN6X01.0044	95	209	152398	152398	11/10/17	4	MALE	NHISPANIC	Human	stool	COLUMBIA
PNUSAS036148	SAMN08772928	Saintpaul	JN6X01.0048	50	14	152504	152504	3/29/18	0	MALE	HISPANIC	Human	stool	PALM BEACH
PNUSAS030958	SAMN08388663	Saintpaul	JN6X01.0025	95	209	153263	153263	11/1/17	69	FEMALE	NHISPANIC	Human	stool	ALACHUA
PNUSAS033670	SAMN08723150	IV 50:z4,z23:-		2053	301	154259	154259	10/26/17	77	MALE	UNKNOWN	Human	stool	CHARLOTTE
PNUSAS032576	SAMN08687405	IV 48:g,z51:-		433	23	155192	155192	11/1/17	82	FEMALE	NHISPANIC	Human		PALM BEACH
PNUSAS051008	SAMN10092273	Bareilly	JAPX01.0064	2553	382	166961	166961	6/29/18	4	FEMALE	HISPANIC	Human	stool	BROWARD
PNUSAS051007	SAMN10092274	Rubislaw	JLPX01.0059	94	133	166963	166963	6/28/18	3	MALE	HISPANIC	Human	stool	DADE
PNUSAS048227	SAMN10092276	Typhimurium	JPXX01.0033	19	1	166965	166965	5/30/18	68	MALE	UNKNOWN	Human	stool	BROWARD
PNUSAS053964	SAMN10133816	Montevideo	JIXX01.0195	138	39	166966	166966	8/5/18	80	FEMALE	NHISPANIC	Human	stool	VOLUSIA
PNUSAS048217	SAMN09763908	Mbandaka	TDRX01.0262	413	62	166967	166967	6/3/18	70	FEMALE	UNKNOWN	Human	stool	DADE
PNUSAS051812	SAMN09933839	Infantis	JFXX01.0799	32	31	166968	166968	7/31/18	2	MALE	NHISPANIC	Human	stool	BROWARD
PNUSAS053362	SAMN09989602	Javiana	JGGX01.0105	24	17	166969	166969	8/11/18	2	MALE	NHISPANIC	Human	stool	ST. JOHNS
PNUSAS055154	SAMN10095862	Infantis	JFXX01.0234	32	31	166971	166971	7/11/18	56	FEMALE	HISPANIC	Human	stool	DADE
PNUSAS054368	SAMN10079061	Saintpaul	JN6X01.0798	50	14	166972	166972	6/29/18	2	FEMALE	NHISPANIC	Human	stool	PALM BEACH
PNUSAS055152	SAMN10095847	Oranienburg	JJXX01.0001	23	41	166973	166973	7/15/18	4	FEMALE	NHISPANIC	Human	stool	MARTIN
PNUSAS053252	SAMN09989929	Rubislaw	JLPX01.0059	94	133	166974	166974	6/6/18	2	FEMALE	NHISPANIC	Human	stool	PALM BEACH
PNUSAS052484	SAMN09941040	Anatum	JAGX01.0001	64	65	166976	166976	6/27/18	65	MALE	HISPANIC	Human	stool	BROWARD
PNUSAS053245	SAMN10092277	Typhimurium	JPXX01.0787	19	1	166987	166987	8/23/18	87	FEMALE	NHISPANIC	Human	stool	SEMINOLE
PNUSAS053244	SAMN10092278	Typhimurium	JPXX01.0787	19	1	166988	166988	8/18/18	85	FEMALE	NHISPANIC	Human	stool	SEMINOLE
PNUSAS054374	SAMN10079103	Sandiego	JLXX01.0354	126	12	166989	166989	7/5/18	19	MALE	HISPANIC	Human	BLOOD	DADE
PNUSAS053267	SAMN09989957	Bareilly	JAPX01.0665	2553	382	166990	166990	6/28/18	14	MALE	NHISPANIC	Human	stool	BROWARD
PNUSAS054370	SAMN10079058	Muenchen	JJ6X01.2107	1567	8	166992	166992	7/5/18	0	MALE	HISPANIC	Human	stool	DADE
PNUSAS051521	SAMN09880460	Braenderup	JBPX01.0002	22	24	166994	166994	7/30/18	42	FEMALE	NHISPANIC	Human	stool	CLAY
PNUSAS051520	SAMN09880461	Braenderup	JBPX01.0002	22	24	166996	166996	8/1/18	17	FEMALE	NHISPANIC	Human	stool	NA
PNUSAS048215	SAMN09763910	Sandiego	JLXX01.0713	126	12	167756	167756	5/27/18	12	MALE	NHISPANIC	Human	BLOOD	PALM BEACH
PNUSAS050988	SAMN09848079	Typhimurium		19	1	167762	167762	6/21/18	67	MALE	NHISPANIC	Human	stool	DADE
PNUSAS049969	SAMN09791525	Newport	JJPX01.3716	46	3	167764	167764	6/1/18	1	FEMALE	HISPANIC	Human	stool	BROWARD
PNUSAS052142	SAMN09990220	Typhimurium	JPXX01.0006	19	1	167769	169287	7/3/18	0	MALE	HISPANIC	Human	stool	CHARLOTTE
PNUSAS052141	SAMN09990221	Typhimurium	JPXX01.0006	19	1	167769	167769	7/3/18	12	MALE	NHISPANIC	Human	stool	HILLSBOROUGH
PNUSAS048225	SAMN09744728	Oranienburg	JJXX01.0001	23	41	167770	167770	5/31/18	1	MALE	UNKNOWN	Human	stool	PALM BEACH
PNUSAS048284	SAMN09791521	Typhimurium	JPXX01.0003	19	1	167788	167788	4/6/18	4	MALE	NHISPANIC	Human	stool	LEE
PNUSAS047001	SAMN09739388	Braenderup	JBPX01.0182	22	24	167821	167821	4/24/18	11	MALE	NHISPANIC	Human	stool	NASSAU
PNUSAS040586	SAMN09874945	Cerro	JAAX01	367	37	167822	167822	3/28/18	0	FEMALE	NHISPANIC	Human	stool	LEE
PNUSAS048285	SAMN09791520	Thompson	JP6X01.0167	26	28	167849	167849	5/29/18	84	FEMALE	UNKNOWN	Human	stool	VOLUSIA
PNUSAS047152	SAMN09714902	Braenderup	JBPX01.0466	22	24	168065	168065	4/10/18	7	MALE	HISPANIC	Human	stool	BROWARD
PNUSAS048228	SAMN09744726	Sandiego	JLXX01.0354	5823	12	168068	168068	7/9/18	0	MALE	HISPANIC	Human	BLOOD	DADE
PNUSAS028306	SAMN08053141	Braenderup	JBPX01.0039	22	24	168081	168081	8/28/17	0	FEMALE	NHISPANIC	Human	stool	SARASOTA
PNUSAS028303	SAMN08053138	Braenderup	JBPX01.0268	22	24	168081	168081	8/28/17	53	MALE	HISPANIC	Human	stool	SARASOTA
PNUSAS053262	SAMN09989940	Poona	JL6X01.0887	964	315	168082	168082	6/12/18	0	MALE	NHISPANIC	Human	stool	BROWARD
PNUSAS053260	SAMN09989942	Enteritidis	JEGX01.0004	11	4	168083	168083	6/11/18	17	FEMALE	NHISPANIC	Human	stool	BROWARD
PNUSAS048282	SAMN09791513	Typhimurium	JPXX01.0003	19	1	168142	168142	5/2/18	54	MALE	NHISPANIC	Human		PINELLAS
PNUSAS050990	SAMN09848073	Typhimurium	JPXX01.2428	99	1	168147	168147	6/21/18	3	FEMALE	HISPANIC	Human	stool	BROWARD
PNUSAS047003	SAMN09739423	Braenderup	JBPX01.0182	22	24	168260	168260	6/1/18	72	FEMALE	NHISPANIC	Human	stool	INDIAN RIVER
PNUSAS048842	SAMN09763798	Typhimurium	JLXX01.0530	19	1	168265	168265	4/26/18	9	MALE	HISPANIC	Human	stool	DADE
PNUSAS055165	SAMN10095866	Newport	JJPX01.0235	118	2	168377	168377	5/24/18	70	FEMALE	NHISPANIC	Human		LEE
PNUSAS055164	SAMN10095867	Sandiego	JLXX01.0013	126	12	168396	168396	5/25/18	6	FEMALE	NHISPANIC	Human		ORANGE
PNUSAS055788	SAMN10133822	Ituri	LXQX01.0007	455	429	168422	168539	5/29/18	64	FEMALE	NHISPANIC	Human	stool	DUVAL
PNUSAS055789	SAMN10133825	Ituri	LXQX01.0007	455	429	168422	168525	5/29/18	46	MALE	UNKNOWN	Human	stool	ESCAMBIA
PNUSAS055170	SAMN10095894	Ituri	LXQX01.0007	455	429	168422	168422	5/29/18	3	MALE	NHISPANIC	Human	stool	BREVARD
PNUSAS048287	SAMN09791518	Thompson	JP6X01.0167	26	28	168423	168423	5/29/18	55	MALE	NHISPANIC	Human	stool	LEON
PNUSAS048286	SAMN09791519	Thompson	JP6X01.0167	26	28	168423	168423	5/29/18	82	MALE	NHISPANIC	Human	stool	SUWANNEE
PNUSAS056341	SAMN10142015	Sandiego	JLXX01.0121	126	12	168516	168516	6/7/18	49	FEMALE	UNKNOWN	Human	stool	LAKE
PNUSAS051681	SAMN09905681	Newport	JJPX01.0062	118	2	168517	168517	6/8/18	30	MALE	NHISPANIC	Human	stool	ESCAMBIA
PNUSAS056335	SAMN10142008	Newport	JJPX01.0384	118	2	168519	168519	6/8/18	65	MALE	NHISPANIC	Human	stool	SEMINOLE
PNUSAS056321	SAMN10141992	Sandiego	JLXX01.0324	126	12	168520	168520	5/31/18	67	FEMALE	NHISPANIC	Human	stool
PNUSAS056340	SAMN10142016	Anatum	JAGX01.0134	64	65	168521	168521	6/11/18	1	MALE	NHISPANIC	Human	stool	CLAY
PNUSAS056339	SAMN10142017	Javiana	JGGX01.2734	24	17	168522	168522	6/8/18	5	FEMALE	NHISPANIC	Human	stool	SANTA ROSA
PNUSAS056320	SAMN10141993	Sandiego	JLXX01.0324	126	12	168523	168523	5/31/18	5	MALE	HISPANIC	Human	stool	ST. LUCIE
PNUSAS055795	SAMN10133830	Javiana	JGGX01.0047	24	17	168526	168526	5/29/18	6	MALE	NHISPANIC	Human	stool	BREVARD
PNUSAS056319	SAMN10141994	Sandiego	JLXX01.0324	126	12	168527	168527	5/30/18	4	MALE	UNKNOWN	Human	stool	OSCEOLA
PNUSAS056336	SAMN10142007	Javiana	JGGX01.0058	24	17	168529	168529	6/7/18	5	FEMALE	NHISPANIC	Human	stool	LAKE
PNUSAS056318	SAMN10141995	Sandiego	JLXX01.0324	126	12	168531	168531	5/31/18	1	MALE	UNKNOWN	Human	stool	HILLSBOROUGH
PNUSAS055791	SAMN10133823	Sandiego	JLXX01.0324	126	12	168534	168534	5/31/18	57	MALE	NHISPANIC	Human	stool
PNUSAS055786	SAMN10133813	Rubislaw	JLPX01.0602	1575	204	168538	168538	5/30/18	68	FEMALE	NHISPANIC	Human	stool	CLAY
PNUSAS055174	SAMN10095890	Newport	JJPX01.0062	118	2	168543	168543	6/5/18	60	FEMALE	NHISPANIC	Human	stool	ORANGE
PNUSAS048847	SAMN09761634	Braenderup	JBPX01.0104	22	24	168575	168575	5/7/18	1	FEMALE	HISPANIC	Human	stool	DADE
PNUSAS046076	SAMN09696051	Rubislaw	JLPX01.0059	94	133	168576	168576	6/15/18	1	MALE	NHISPANIC	Human	stool	ORANGE
PNUSAS056342	SAMN10142014	Newport	JJPX01.2499	4440	7	168578	168578	6/10/18	28	FEMALE	NHISPANIC	Human		ORANGE
PNUSAS047004	SAMN09739421	Braenderup	JBPX01.0182	22	24	168581	168581	6/12/18	54	FEMALE	NHISPANIC	Human	stool	POLK
PNUSAS052507	SAMN09937758	Javiana	JGGX01.0013	24	17	169028	169028	6/5/18	4	MALE	HISPANIC	Human	stool	ESCAMBIA
PNUSAS052506	SAMN09937759	Thompson	JP6X01.0022	26	28	169030	169030	6/5/18	0	MALE	NHISPANIC	Human	stool	VOLUSIA
PNUSAS052497	SAMN09937739	Typhimurium	JPXX01.0003	19	1	169033	169033	6/6/18	20	FEMALE	NHISPANIC	Human	stool	ORANGE
PNUSAS052496	SAMN09937740	Newport	JJPX01.0062	118	2	169034	169034	6/7/18	15	FEMALE	HISPANIC	Human	stool	DUVAL
PNUSAS052498	SAMN09937738	Sandiego	JLXX01.0480	126	12	169035	169035	6/5/18	1	MALE	HISPANIC	Human	stool	HENDRY
PNUSAS052499	SAMN09937737	Sandiego	JLXX01.0354	126	12	169036	169036	6/7/18	0	FEMALE	UNKNOWN	Human	stool	DUVAL
PNUSAS052500	SAMN09937736	Newport	JJPX01.2123	118	2	169037	169037	6/8/18	54	FEMALE	UNKNOWN	Human	stool
PNUSAS051689	SAMN09905700	Newport	JJPX01.0041	5	2	169038	169038	6/12/18	0	FEMALE	NHISPANIC	Human		BAY
PNUSAS051693	SAMN09905734	Newport	JJPX01.0438	118	2	169039	169039	6/6/18	1	MALE	NHISPANIC	Human	stool	HILLSBOROUGH
PNUSAS056328	SAMN10141999	Saintpaul	JN6X01.0048	50	14	169041	169041	6/5/18	88	MALE	NHISPANIC	Human	stool	MANATEE
PNUSAS051682	SAMN09905680	Oranienburg	JJXX01.0028	1675	41	169042	169042	6/8/18	37	FEMALE	NHISPANIC	Human	stool	LEE
PNUSAS049957	SAMN09791506	Newport	JJPX01.0027	118	2	169047	169047	5/22/18	36	MALE	HISPANIC	Human	stool	DADE
PNUSAS049959	SAMN09791504	Poona	JL6X01.0768	964	315	169049	169049	5/15/18	72	MALE	UNKNOWN	Human	stool	BROWARD
PNUSAS048855	SAMN09761628	Rubislaw	JLPX01.0447	94	133	169050	169050	5/10/18	59	FEMALE	UNKNOWN	Human	stool	NA
PNUSAS048852	SAMN09761630	Javiana	JGGX01.2426	24	17	169051	169051	5/6/18	1	FEMALE	NHISPANIC	Human	stool	BROWARD
PNUSAS048851	SAMN09761631	Braenderup	JBPX01.0523	22	24	169052	169052	5/15/18	85	MALE	HISPANIC	Human	stool	DADE
PNUSAS055808	SAMN10133849	Javiana	JGGX01.0012	24	17	169060	169060	6/15/18	0	FEMALE	NHISPANIC	Human	stool	DUVAL
PNUSAS055183	SAMN10095880	Newport	JJPX01.1477	118	2	169062	169062	6/18/18	58	FEMALE	NHISPANIC	Human	stool	ALACHUA
PNUSAS055805	SAMN10133828	Newport	JJPX01.0588	118	2	169064	169064	6/15/18	1	MALE	HISPANIC	Human	stool	SARASOTA
PNUSAS054386	SAMN10088546	Saintpaul	JN6X01.0044	95	209	169065	169065	6/13/18	66	MALE	NHISPANIC	Human	stool	LAKE
PNUSAS054385	SAMN10088547	Montevideo	JIXX01.0027	81	40	169066	169066	6/12/18	0	MALE	NHISPANIC	Human	stool	ST. JOHNS
PNUSAS047839	SAMN09727040	Typhimurium	JPXX01.0006	19	1	169070	169070	5/22/18	13	FEMALE	NHISPANIC	Human	stool	PALM BEACH
PNUSAS047838	SAMN09727041	Hadar	TDKX01.0271	473	22	169071	169071	5/21/18	12	MALE	UNKNOWN	Human	stool	PALM BEACH
PNUSAS047836	SAMN09727024	Bareilly	JAPX01.0064	2553	382	169072	169072	5/21/18	3	FEMALE	NHISPANIC	Human	stool	PALM BEACH
PNUSAS049966	SAMN09791527	Poona	JL6X01.0379	964	315	169073	169073	5/21/18	98	FEMALE	NHISPANIC	Human		PALM BEACH
PNUSAS049965	SAMN09791528	Infantis	JFXX01.0787	32	31	169075	169075	5/22/18	17	FEMALE	HISPANIC	Human	stool	DADE
PNUSAS054376	SAMN10079097	Sandiego	JLXX01.0354	126	12	169078	169078	6/1/18	2	MALE	NHISPANIC	Human	stool	BREVARD
PNUSAS048206	SAMN09744566	Sandiego	JLXX01.0486	126	12	169081	169081	5/8/18	1	MALE	HISPANIC	Human	stool	BROWARD
PNUSAS055181	SAMN10095882	Javiana	JGGX01.0036	24	17	169104	169104	6/14/18	2	FEMALE	NHISPANIC	Human	stool	OKALOOSA
PNUSAS048220	SAMN09744565	Newport	JJPX01.1346	118	2	169270	169270	6/7/18	35	FEMALE	NHISPANIC	Human		PASCO
PNUSAS048216	SAMN09763909	Newport	JJPX01.0036	118	2	169273	169273	5/30/18	86	MALE	NHISPANIC	Human	BLOOD	PALM BEACH
PNUSAS050984	SAMN09848083	Enteritidis	JEGX01.0004	11	4	169275	169275	6/19/18	17	MALE	UNKNOWN	Human	stool	PALM BEACH
PNUSAS052140	SAMN09990222	Typhimurium	JPXX01.0146	19	1	169276	169276	6/22/18	6	FEMALE	NHISPANIC	Human	stool	NA
PNUSAS047829	SAMN09739420	Poona	JL6X01.0889	964	315	169278	169278	5/19/18	0	MALE	HISPANIC	Human	stool	DADE
PNUSAS049970	SAMN09791524	Sandiego	JLXX01.0556	126	12	169279	169279	6/11/18	1	UNKNOWN	UNKNOWN	Human	stool	BROWARD
PNUSAS053369	SAMN09989932	Javiana	JGGX01.3113	4750	17	169284	169284	6/17/18	4	FEMALE	HISPANIC	Human	stool	DADE
PNUSAS053367	SAMN09989934	Typhimurium	JPXX01.0278	19	1	169286	169286	6/15/18	7	MALE	UNKNOWN	Human	stool	BROWARD
PNUSAS053263	SAMN09989939	Muenchen	JJ6X01.0720	112	8	169290	169290	6/13/18	1	FEMALE	NHISPANIC	Human	stool	DADE
PNUSAS051000	SAMN09848089	Javiana	JGGX01.0001	24	17	169292	169292	6/23/18	64	MALE	HISPANIC	Human		DADE
PNUSAS050992	SAMN09848114	Glostrup	JAAX01	2519	333	169294	169294	6/22/18	0	FEMALE		Human	stool	BROWARD
PNUSAS050995	SAMN09848104	Baildon		2166	399	169295	169295	6/24/18	69	FEMALE	HISPANIC	Human	stool	DADE
PNUSAS010675	SAMN06647596	Florida		931	81	181938	181938	2/10/17	0	MALE	UNKNOWN	Human	stool
PNUSAS027244	SAMN07842076	Sandiego	JLXX01.0354	126	12	181940	181940	10/2/17	31	MALE	HISPANIC	Human	stool	DUVAL
PNUSAS027183	SAMN07842068	Mississippi	JIPX01.0595	6098	80	181941	181941	4/25/17	2	MALE	UNKNOWN	Human	stool	DUVAL
PNUSAS027237	SAMN07842073	Newport	JJPX01.3716	46	3	181942	181942	10/5/17	0	FEMALE	NHISPANIC	Human	stool	BROWARD
PNUSAS027245	SAMN07842077	Newport	JJPX01.0041	5	2	181943	181943	10/5/17	1	MALE	UNKNOWN	Human	stool	DUVAL
PNUSAS027241	SAMN07842087	Newport	JJPX01.0036	118	2	181944	181944	10/5/17	66	FEMALE	NHISPANIC	Human	stool	CLAY
PNUSAS030940	SAMN08235395	Javiana		24	17	181945	181945	10/25/17	6	FEMALE	HISPANIC	Human		LEE
PNUSAS015115	SAMN07202678	Muenchen		112	8	181949	181949	5/11/17	57	MALE	NHISPANIC	Human	stool	ST. JOHNS
PNUSAS032577	SAMN08630794	Newport	JJPX01.3716	46	3	181952	181952	10/31/17	51	FEMALE	NHISPANIC	Human	stool	DADE
PNUSAS027236	SAMN07842072	Weltevreden		365	205	181955	181955	10/5/17	0	MALE	NHISPANIC	Human	stool	PALM BEACH
PNUSAS032598	SAMN08630787	Rubislaw		1575	204	181959	181959	11/11/17	0	FEMALE	UNKNOWN	Human	stool	HILLSBOROUGH
PNUSAS033811	SAMN08639148	Bareilly	JAPX01.0064	2553	382	181960	181960	3/8/18	0	MALE	NHISPANIC	Human		BROWARD
PNUSAS033806	SAMN08639153	Javiana	JGGX01.0092	24	17	181963	181963	11/17/17	37	FEMALE	NHISPANIC	Human	stool	WALTON
PNUSAS030375	SAMN08294537	Newport	JAAX01	118	2	181965	181965	10/26/17	70	FEMALE	UNKNOWN	Human	stool	SARASOTA
PNUSAS030164	SAMN08211526	I 1,4,[5],12:b:-	JKXX01.1438	1838	155	181966	181966	9/19/17	9	FEMALE	NHISPANIC	Human	stool	MANATEE
PNUSAS010876	SAMN06647594	IV 50:z4,z23:-		2053	301	181975	181975	1/18/17	0	FEMALE	HISPANIC	Human	stool	LEE
PNUSAS010875	SAMN06647593	IV 50:z4,z23:-		2053	301	181976	181976	1/16/17	59	MALE	NHISPANIC	Human	stool	HILLSBOROUGH
PNUSAS033808	SAMN08639151	Javiana	JGGX01.0094	24	17	182313	182313	3/5/18	1	FEMALE	NHISPANIC	Human		DUVAL
PNUSAS033810	SAMN08639149	Rubislaw	JLPX01.0059	94	133	182314	182314	3/5/18	0	FEMALE	NHISPANIC	Human		VOLUSIA
PNUSAS033799	SAMN08639141	Rubislaw	JLPX01.0059	94	133	182320	182320	11/16/17	3	FEMALE	UNKNOWN	Human	stool	PASCO
PNUSAS037757	SAMN08832557	Rubislaw		1575	204	215614	215614	2/3/18	0	FEMALE	HISPANIC	Human	stool	DADE
