# Supplementary material for: Molecular Epidemiology of Salmonellosis in Florida, USA, 2017–2018
Source: Front Med (Lausanne). 2021 Apr 22;8:656827. doi: 10.3389/fmed.2021.656827 (PMC8100233; doi:10.3389/fmed.2021.656827)
Supplement: Supplementary file 3 [file Data_Sheet_3.csv]

Strain	NCBI_ACCESSION	SISTR1_Serotype	HC5_cgMLST	HC2_cgMLST	Source.Niche	Region	IsolatDate	Location	Collected.by	Virulence.genotypes	AMR_genotypes
PNUSAS018355	SAMN07352347	Enteritidis	85	10207	Human	Florida	5/14/17	USA:FL	CDC		mdsA=COMPLETE,mdsB=COMPLETE
PNUSAS013892	SAMN07143130	Enteritidis	85	47689	Human	Florida	4/17/17	USA:FL	CDC		mdsA=COMPLETE,mdsB=COMPLETE
PNUSAS013896	SAMN07143134	Enteritidis	85	85	Human	Florida	4/17/17	USA:FL	CDC		mdsA=COMPLETE,mdsB=COMPLETE
FSIS11808581	SAMN08801767	Enteritidis	85	10207	Poultry	Alabama	9/17/18	USA:AL	USDA-FSIS		mdsA=COMPLETE,mdsB=COMPLETE
FSIS1700538	SAMN06882374	Enteritidis	85	69898	Poultry	South Carolina	9/17/17	USA:SC	USDA-FSIS		mdsA=COMPLETE,mdsB=COMPLETE
FSIS1700733	SAMN07152177	Enteritidis	85	47689	Poultry	South Carolina	9/17/17	USA:SC	USDA-FSIS		mdsA=COMPLETE,mdsB=COMPLETE
FSIS1701106	SAMN07152178	Enteritidis	85	85	Poultry	Washington	9/17/17	USA:WA	USDA-FSIS		mdsA=COMPLETE,mdsB=COMPLETE
FSIS1710643	SAMN06553735	Enteritidis	85	10207	Poultry	South Carolina	9/17/17	USA:SC	USDA-FSIS		mdsA=COMPLETE,mdsB=COMPLETE
FSIS1710777	SAMN06602841	Enteritidis	85	85	Poultry	South Carolina	9/17/17	USA:SC	USDA-FSIS		mdsA=COMPLETE,mdsB=COMPLETE
FSIS1710794	SAMN06642013	Enteritidis	85	85	Poultry	South Carolina	9/17/17	USA:SC	USDA-FSIS		mdsA=COMPLETE,mdsB=COMPLETE
FSIS21720794	SAMN08217095	Enteritidis	85	78256	Poultry	Massachusetts	9/17/17	USA:MA	USDA-FSIS		mdsA=COMPLETE,mdsB=COMPLETE
FSIS21821151	SAMN08624161	Enteritidis	85	78256	Poultry	Massachusetts	9/17/18	USA:MA	USDA-FSIS		mdsA=COMPLETE,mdsB=COMPLETE
FSIS21821475	SAMN08969966	Enteritidis	85	69898	Poultry	Illinois	9/17/18	USA:IL	USDA-FSIS		mdsA=COMPLETE,mdsB=COMPLETE
FSIS21821557	SAMN09076845	Enteritidis	85	69898	Poultry	Washington	9/17/18	USA:WA	USDA-FSIS	sinH=PARTIUSA:AL	mdsA=COMPLETE,mdsB=COMPLETE
FSIS21822680	SAMN10405209	Enteritidis	85	69898	Poultry	North Carolina	9/17/18	USA:NC	USDA-FSIS		mdsA=COMPLETE,mdsB=COMPLETE
FSIS31800136	SAMN08527844	Enteritidis	85	69898	Poultry	South Carolina	9/17/18	USA:SC	USDA-FSIS		mdsA=COMPLETE,mdsB=COMPLETE
FSIS31800313	SAMN08904794	Enteritidis	85	108832	Poultry	South Carolina	9/17/18	USA:SC	USDA-FSIS		mdsA=COMPLETE,mdsB=COMPLETE
FSIS31800327	SAMN08934992	Enteritidis	85	69898	Poultry	South Carolina	9/17/18	USA:SC	USDA-FSIS		mdsA=COMPLETE,mdsB=COMPLETE
PNUSAS053368	SAMN09989933	Enteritidis	150	169289	Human	Florida	6/12/18	USA:FL	CDC	sinH=PARTIUSA:AL	mdsA=COMPLETE,mdsB=COMPLETE
PNUSAS054389	SAMN10088543	Enteritidis	150	123047	Human	Florida	6/16/18	USA:FL	CDC		mdsA=COMPLETE,mdsB=COMPLETE
PNUSAS032263	SAMN08383942	Enteritidis	150	68567	Human	Florida	10/25/17	USA:FL	CDC		mdsA=COMPLETE,mdsB=COMPLETE
PNUSAS021441	SAMN07571925	Enteritidis	150	4151	Human	Florida	7/10/17	USA:FL	CDC		mdsA=COMPLETE,mdsB=COMPLETE
PNUSAS021423	SAMN07568805	Enteritidis	150	8440	Human	Florida	7/14/17	USA:FL	CDC		mdsA=COMPLETE,mdsB=COMPLETE
PNUSAS018884	SAMN07436595	Enteritidis	150	4151	Human	Florida	6/1/17	USA:FL	CDC	sinH=PARTIUSA:AL	mdsA=COMPLETE,mdsB=COMPLETE
PNUSAS017663	SAMN07414536	Enteritidis	150	72875	Human	Florida	4/17/17	USA:FL	CDC		mdsA=COMPLETE,mdsB=COMPLETE
PNUSAS018352	SAMN07352344	Enteritidis	150	4151	Human	Florida	5/9/17	USA:FL	CDC	sinH=PARTIUSA:AL	mdsA=COMPLETE,mdsB=COMPLETE
PNUSAS016341	SAMN07269337	Enteritidis	150	8440	Human	Florida	3/27/17	USA:FL	CDC		mdsA=COMPLETE,mdsB=COMPLETE
PNUSAS016339	SAMN07269335	Enteritidis	150	8440	Human	Florida	3/27/17	USA:FL	CDC		mdsA=COMPLETE,mdsB=COMPLETE
PNUSAS014746	SAMN07197378	Enteritidis	150	8440	Human	Florida	4/21/17	USA:FL	CDC		mdsA=COMPLETE,mdsB=COMPLETE
PNUSAS013878	SAMN07143116	Enteritidis	150	8440	Human	Florida	4/6/17	USA:FL	CDC		mdsA=COMPLETE,mdsB=COMPLETE
PNUSAS013968	SAMN07159306	Enteritidis	150	4151	Human	Florida	3/28/17	USA:FL	CDC		mdsA=COMPLETE,mdsB=COMPLETE
PNUSAS013969	SAMN07159307	Enteritidis	150	68858	Human	Florida	3/27/17	USA:FL	CDC		mdsA=COMPLETE,mdsB=COMPLETE
FSIS11703992	SAMN07565876	Enteritidis	150	8440	Poultry	California	9/17/17	USA:CA	USDA-FSIS		mdsA=COMPLETE,mdsB=COMPLETE
FSIS11704270	SAMN07646012	Enteritidis	150	86790	Poultry	California	9/17/17	USA:CA	USDA-FSIS		mdsA=COMPLETE,mdsB=COMPLETE
FSIS11704371	SAMN07672001	Enteritidis	150	87215	Poultry	Michigan	9/17/17	USA:MI	USDA-FSIS		mdsA=COMPLETE,mdsB=COMPLETE
FSIS11704419	SAMN07714836	Enteritidis	150	46015	Poultry	California	9/17/17	USA:CA	USDA-FSIS		mdsA=COMPLETE,mdsB=COMPLETE
FSIS11704645	SAMN07746407	Enteritidis	150	91802	Poultry	Minnesota	9/17/17	USA:MN	USDA-FSIS		mdsA=COMPLETE,mdsB=COMPLETE
FSIS11704678	SAMN07775027	Enteritidis	150	57183	Poultry	North Carolina	9/17/17	USA:NC	USDA-FSIS		mdsA=COMPLETE,mdsB=COMPLETE
FSIS11704701	SAMN07809348	Enteritidis	150	8440	Poultry	Alabama	9/17/17	USA:AL	USDA-FSIS		mdsA=COMPLETE,mdsB=COMPLETE
FSIS11704702	SAMN07809349	Enteritidis	150	8440	Poultry	North Carolina	9/17/17	USA:NC	USDA-FSIS		mdsA=COMPLETE,mdsB=COMPLETE
FSIS11704839	SAMN07835370	Enteritidis	150	8440	Poultry	Missouri	9/17/17	USA:MO	USDA-FSIS		mdsA=COMPLETE,mdsB=COMPLETE
FSIS11704919	SAMN07975070	Enteritidis	150	68567	Poultry	Georgia	9/17/17	USA:GA	USDA-FSIS		mdsA=COMPLETE,mdsB=COMPLETE
FSIS11704925	SAMN07975076	Enteritidis	150	72935	Poultry	Oregon	9/17/17	USA:OR	USDA-FSIS		mdsA=COMPLETE,mdsB=COMPLETE
FSIS11705030	SAMN07955764	Enteritidis	150	95105	Poultry	Alabama	9/17/17	USA:AL	USDA-FSIS		mdsA=COMPLETE,mdsB=COMPLETE
FSIS11705154	SAMN07968647	Enteritidis	150	91802	Poultry	North Carolina	9/17/17	USA:NC	USDA-FSIS		mdsA=COMPLETE,mdsB=COMPLETE
FSIS11705563	SAMN08028411	Enteritidis	150	74481	Poultry	Tennessee	9/17/17	USA:TN	USDA-FSIS		mdsA=COMPLETE,mdsB=COMPLETE
FSIS11705746	SAMN08038021	Enteritidis	150	98144	Poultry	Michigan	9/17/17	USA:MI	USDA-FSIS		mdsA=COMPLETE,mdsB=COMPLETE
FSIS11706313	SAMN08170602	Enteritidis	150	14277	Poultry	Missouri	9/17/17	USA:MO	USDA-FSIS		mdsA=COMPLETE,mdsB=COMPLETE,tet(A)=COMPLETE
FSIS11706380	SAMN08178250	Enteritidis	150	8440	Poultry	Arkansas	9/17/17	USA:AR	USDA-FSIS		mdsA=COMPLETE,mdsB=COMPLETE
FSIS11706477	SAMN08447494	Enteritidis	150	62727	Poultry	Georgia	9/17/17	USA:GA	USDA-FSIS		mdsA=COMPLETE,mdsB=COMPLETE
FSIS11706522	SAMN08244056	Enteritidis	150	103495	Poultry	Washington	9/17/17	USA:WA	USDA-FSIS	sinH=PARTIUSA:AL	mdsA=COMPLETE,mdsB=COMPLETE
FSIS11706540	SAMN08291424	Enteritidis	150	14078	Poultry	Washington	9/17/17	USA:WA	USDA-FSIS		mdsA=COMPLETE,mdsB=COMPLETE
FSIS11706847	SAMN08377169	Enteritidis	150	46015	Poultry	Iowa	9/17/17	USA:IA	USDA-FSIS		mdsA=COMPLETE,mdsB=COMPLETE
FSIS11807105	SAMN08386932	Enteritidis	150	8440	Poultry	Alabama	9/17/17	USA:AL	USDA-FSIS		mdsA=COMPLETE,mdsB=COMPLETE
FSIS11807223	SAMN08458094	Enteritidis	150	68567	Poultry	Florida	9/17/18	USA:FL	USDA-FSIS		mdsA=COMPLETE,mdsB=COMPLETE
FSIS11807233	SAMN08458103	Enteritidis	150	56736	Poultry	Georgia	9/17/18	USA:GA	USDA-FSIS		mdsA=COMPLETE,mdsB=COMPLETE
FSIS11807380	SAMN08801752	Enteritidis	150	8440	Poultry	Alabama	9/17/18	USA:AL	USDA-FSIS		mdsA=COMPLETE,mdsB=COMPLETE
FSIS11807386	SAMN08631230	Enteritidis	150	110212	Poultry	Georgia	9/17/18	USA:GA	USDA-FSIS		mdsA=COMPLETE,mdsB=COMPLETE
FSIS11807565	SAMN08513668	Enteritidis	150	8440	Poultry	Alabama	9/17/18	USA:AL	USDA-FSIS		mdsA=COMPLETE,mdsB=COMPLETE
FSIS11807598	SAMN08863877	Enteritidis	150	68567	Poultry	Georgia	9/17/18	USA:GA	USDA-FSIS		mdsA=COMPLETE,mdsB=COMPLETE
FSIS11807738	SAMN08558129	Enteritidis	150	109853	Poultry	Arkansas	9/17/18	USA:AR	USDA-FSIS		mdsA=COMPLETE,mdsB=COMPLETE
FSIS11808296	SAMN08863884	Enteritidis	150	95622	Poultry	Oklahoma	9/17/18	USA:OK	USDA-FSIS		mdsA=COMPLETE,mdsB=COMPLETE
FSIS11808376	SAMN08851623	Enteritidis	150	8440	Poultry	Georgia	9/17/18	USA:GA	USDA-FSIS	sinH=PARTIUSA:AL	mdsA=COMPLETE,mdsB=COMPLETE
FSIS11808381	SAMN08851626	Enteritidis	150	56736	Poultry	Kansas	9/17/18	USA:PR	USDA-FSIS		mdsA=COMPLETE,mdsB=COMPLETE
FSIS11808849	SAMN08873599	Enteritidis	150	8440	Poultry	Georgia	9/17/18	USA:GA	USDA-FSIS		mdsA=COMPLETE,mdsB=COMPLETE
FSIS11808998	SAMN08921936	Enteritidis	150	116579	Poultry	Illinois	9/17/18	USA:IL	USDA-FSIS		mdsA=COMPLETE,mdsB=COMPLETE
FSIS11809057	SAMN08930147	Enteritidis	150	8440	Poultry	Alabama	9/17/18	USA:AL	USDA-FSIS		mdsA=COMPLETE,mdsB=COMPLETE
FSIS11809230	SAMN08995939	Enteritidis	150	47604	Poultry	Arkansas	9/17/18	USA:AR	USDA-FSIS		mdsA=COMPLETE,mdsB=COMPLETE
FSIS11809471	SAMN09002931	Enteritidis	150	4151	Poultry	Georgia	9/17/18	USA:GA	USDA-FSIS		mdsA=COMPLETE,mdsB=COMPLETE
FSIS11809632	SAMN09284857	Enteritidis	150	4151	Poultry	Georgia	9/17/18	USA:GA	USDA-FSIS		mdsA=COMPLETE,mdsB=COMPLETE
FSIS11809795	SAMN09213708	Enteritidis	150	4015	Poultry	California	9/17/18	USA:CA	USDA-FSIS		mdsA=COMPLETE,mdsB=COMPLETE
FSIS11809800	SAMN09213713	Enteritidis	150	47604	Poultry	Oklahoma	9/17/18	USA:OK	USDA-FSIS		mdsA=COMPLETE,mdsB=COMPLETE
FSIS11809917	SAMN09220817	Enteritidis	150	8440	Poultry	Alabama	9/17/18	USA:AL	USDA-FSIS		mdsA=COMPLETE,mdsB=COMPLETE
FSIS11810292	SAMN09372609	Enteritidis	150	124387	Poultry	North Carolina	9/17/18	USA:NC	USDA-FSIS		mdsA=COMPLETE,mdsB=COMPLETE
FSIS11810460	SAMN09395805	Enteritidis	150	126031	Poultry	Kentucky	9/17/18	USA:KY	USDA-FSIS		mdsA=COMPLETE,mdsB=COMPLETE
FSIS11810835	SAMN09489530	Enteritidis	150	56736	Poultry	Georgia	9/17/18	USA:GA	USDA-FSIS		mdsA=COMPLETE,mdsB=COMPLETE
FSIS11810950	SAMN09479626	Enteritidis	150	68567	Poultry	Georgia	9/17/18	USA:GA	USDA-FSIS		mdsA=COMPLETE,mdsB=COMPLETE
FSIS11811144	SAMN09501179	Enteritidis	150	68567	Poultry	Georgia	9/17/18	USA:GA	USDA-FSIS		mdsA=COMPLETE,mdsB=COMPLETE
FSIS11811235	SAMN09521771	Enteritidis	150	8440	Poultry	Georgia	9/17/18	USA:GA	USDA-FSIS		mdsA=COMPLETE,mdsB=COMPLETE
FSIS11811236	SAMN09521772	Enteritidis	150	123047	Poultry	Georgia	9/17/18	USA:GA	USDA-FSIS		mdsA=COMPLETE,mdsB=COMPLETE
FSIS11811364	SAMN09545732	Enteritidis	150	134974	Poultry	Alabama	9/17/18	USA:AL	USDA-FSIS		mdsA=COMPLETE,mdsB=COMPLETE
FSIS11811407	SAMN09633418	Enteritidis	150	80485	Poultry	Georgia	9/17/18	USA:GA	USDA-FSIS		mdsA=COMPLETE,mdsB=COMPLETE
FSIS11811501	SAMN09633825	Enteritidis	150	136111	Poultry	Florida	9/17/18	USA:FL	USDA-FSIS		mdsA=COMPLETE,mdsB=COMPLETE
FSIS11811525	SAMN09633849	Enteritidis	150	68567	Poultry	South Carolina	9/17/18	USA:SC	USDA-FSIS		mdsA=COMPLETE,mdsB=COMPLETE
FSIS11812198	SAMN09730243	Enteritidis	150	24414	Poultry	Alabama	9/17/18	USA:AL	USDA-FSIS		mdsA=COMPLETE,mdsB=COMPLETE
FSIS11812227	SAMN09730311	Enteritidis	150	138891	Poultry	Georgia	9/17/18	USA:GA	USDA-FSIS		mdsA=COMPLETE,mdsB=COMPLETE
FSIS11812285	SAMN09756636	Enteritidis	150	137000	Poultry	Texas	9/17/18	USA:TX	USDA-FSIS		mdsA=COMPLETE,mdsB=COMPLETE
FSIS11812805	SAMN09866615	Enteritidis	150	74481	Poultry	Kentucky	9/17/18	USA:KY	USDA-FSIS		mdsA=COMPLETE,mdsB=COMPLETE
FSIS11813699	SAMN09980230	Enteritidis	150	46015	Poultry	Colorado	9/17/18	USA:CO	USDA-FSIS		mdsA=COMPLETE,mdsB=COMPLETE
FSIS11813804	SAMN10097124	Enteritidis	150	46015	Poultry	Colorado	9/17/18	USA:CO	USDA-FSIS		mdsA=COMPLETE,mdsB=COMPLETE
FSIS11813987	SAMN10078831	Enteritidis	150	46015	Poultry	Colorado	9/17/18	USA:CO	USDA-FSIS		mdsA=COMPLETE,mdsB=COMPLETE
FSIS11814363	SAMN10142516	Enteritidis	150	145613	Poultry	Georgia	9/17/18	USA:GA	USDA-FSIS		mdsA=COMPLETE,mdsB=COMPLETE
FSIS11814727	SAMN10258652	Enteritidis	150	147302	Poultry	Alabama	9/17/18	USA:AL	USDA-FSIS		mdsA=COMPLETE,mdsB=COMPLETE
FSIS11814880	SAMN10258683	Enteritidis	150	147308	Poultry	Kentucky	9/17/18	USA:KY	USDA-FSIS		mdsA=COMPLETE,mdsB=COMPLETE
FSIS11814949	SAMN10389850	Enteritidis	150	151303	Poultry	Georgia	9/17/18	USA:GA	USDA-FSIS		mdsA=COMPLETE,mdsB=COMPLETE
FSIS11815090	SAMN10346649	Enteritidis	150	150137	Poultry	Delaware	9/17/18	USA:DE	USDA-FSIS		mdsA=COMPLETE,mdsB=COMPLETE
FSIS11816688	SAMN10713716	Enteritidis	150	151303	Poultry	Georgia	9/17/18	USA:GA	USDA-FSIS		mdsA=COMPLETE,mdsB=COMPLETE
FSIS1700030	SAMN06701840	Enteritidis	150	36703	Poultry	Arkansas	9/17/17	USA:AR	USDA-FSIS		mdsA=COMPLETE,mdsB=COMPLETE
FSIS1700077	SAMN06701506	Enteritidis	150	68567	Poultry	Georgia	9/17/17	USA:GA	USDA-FSIS		mdsA=COMPLETE,mdsB=COMPLETE
FSIS1700178	SAMN06754672	Enteritidis	150	68671	Poultry	Minnesota	9/17/17	USA:MN	USDA-FSIS		mdsA=COMPLETE,mdsB=COMPLETE
FSIS1700247	SAMN06761471	Enteritidis	150	68858	Poultry	Oklahoma	9/17/17	USA:OK	USDA-FSIS		mdsA=COMPLETE,mdsB=COMPLETE
FSIS1700255	SAMN06761479	Enteritidis	150	68872	Poultry	Georgia	9/17/17	USA:GA	USDA-FSIS		mdsA=COMPLETE,mdsB=COMPLETE
FSIS1700276	SAMN06826371	Enteritidis	150	68567	Poultry	Georgia	9/17/17	USA:GA	USDA-FSIS		mdsA=COMPLETE,mdsB=COMPLETE
FSIS1700341	SAMN06847151	Enteritidis	150	8440	Poultry	Mississippi	9/17/17	USA:MS	USDA-FSIS		mdsA=COMPLETE,mdsB=COMPLETE
FSIS1700342	SAMN06847152	Enteritidis	150	69485	Poultry	Illinois	9/17/17	USA:IL	USDA-FSIS		mdsA=COMPLETE,mdsB=COMPLETE
FSIS1700512	SAMN06847132	Enteritidis	150	69476	Poultry	Georgia	9/17/17	USA:GA	USDA-FSIS		mdsA=COMPLETE,mdsB=COMPLETE
FSIS1700514	SAMN06847134	Enteritidis	150	8440	Poultry	Alabama	9/17/17	USA:AL	USDA-FSIS		mdsA=COMPLETE,mdsB=COMPLETE
FSIS1700522	SAMN06847170	Enteritidis	150	69520	Poultry	New York	9/17/17	USA:NY	USDA-FSIS		mdsA=COMPLETE,mdsB=COMPLETE
FSIS1700690	SAMN06882353	Enteritidis	150	69949	Poultry	New York	9/17/17	USA:NY	USDA-FSIS		mdsA=COMPLETE,mdsB=COMPLETE
FSIS1700691	SAMN06882354	Enteritidis	150	69949	Poultry	Maryland	9/17/17	USA:MD	USDA-FSIS		mdsA=COMPLETE,mdsB=COMPLETE
FSIS1700696	SAMN06882359	Enteritidis	150	69920	Poultry	Alabama	9/17/17	USA:AL	USDA-FSIS		mdsA=COMPLETE,mdsB=COMPLETE
FSIS1700715	SAMN07163925	Enteritidis	150	8440	Poultry	Georgia	9/17/17	USA:GA	USDA-FSIS		mdsA=COMPLETE,mdsB=COMPLETE
FSIS1701045	SAMN07193952	Enteritidis	150	74048	Poultry	North Carolina	9/17/17	USA:NC	USDA-FSIS		mdsA=COMPLETE,mdsB=COMPLETE
FSIS1701124	SAMN07237765	Enteritidis	150	14277	Poultry	Missouri	9/17/17	USA:MO	USDA-FSIS		mdsA=COMPLETE,mdsB=COMPLETE,tet(A)=COMPLETE
FSIS1701367	SAMN07237666	Enteritidis	150	69920	Poultry	Alabama	9/17/17	USA:AL	USDA-FSIS		mdsA=COMPLETE,mdsB=COMPLETE
FSIS1701405	SAMN07195291	Enteritidis	150	4015	Poultry	Pennsylvania	9/17/17	USA:PA	USDA-FSIS		mdsA=COMPLETE,mdsB=COMPLETE
FSIS1701562	SAMN07206069	Enteritidis	150	4151	Poultry	South Carolina	9/17/17	USA:SC	USDA-FSIS		mdsA=COMPLETE,mdsB=COMPLETE
FSIS1701678	SAMN07237686	Enteritidis	150	74481	Poultry	Kentucky	9/17/17	USA:KY	USDA-FSIS		mdsA=COMPLETE,mdsB=COMPLETE
FSIS1701686	SAMN07352495	Enteritidis	150	78311	Poultry	North Carolina	9/17/17	USA:NC	USDA-FSIS		mdsA=COMPLETE,mdsB=COMPLETE
FSIS1701813	SAMN07237739	Enteritidis	150	8440	Poultry	Alabama	9/17/17	USA:AL	USDA-FSIS		mdsA=COMPLETE,mdsB=COMPLETE
FSIS1702124	SAMN07260893	Enteritidis	150	8440	Poultry	Alabama	9/17/17	USA:AL	USDA-FSIS		mdsA=COMPLETE,mdsB=COMPLETE
FSIS1702362	SAMN07371052	Enteritidis	150	8440	Poultry	Alabama	9/17/17	USA:AL	USDA-FSIS		mdsA=COMPLETE,mdsB=COMPLETE
FSIS1702369	SAMN07371059	Enteritidis	150	78811	Poultry	Georgia	9/17/17	USA:GA	USDA-FSIS		mdsA=COMPLETE,mdsB=COMPLETE
FSIS1702583	SAMN07312501	Enteritidis	150	77030	Poultry	Kentucky	9/17/17	USA:KY	USDA-FSIS		mdsA=COMPLETE,mdsB=COMPLETE
FSIS1702845	SAMN07368629	Enteritidis	150	8440	Poultry	Illinois	9/17/17	USA:IL	USDA-FSIS		mdsA=COMPLETE,mdsB=COMPLETE
FSIS1702921	SAMN07410350	Enteritidis	150	14277	Poultry	Wisconsin	9/17/17	USA:WI	USDA-FSIS		mdsA=COMPLETE,mdsB=COMPLETE
FSIS1702956	SAMN07410364	Enteritidis	150	8440	Poultry	Alabama	9/17/17	USA:AL	USDA-FSIS	sinH=PARTIUSA:AL	mdsA=COMPLETE,mdsB=COMPLETE
FSIS1703126	SAMN07424758	Enteritidis	150	62727	Poultry	South Carolina	9/17/17	USA:SC	USDA-FSIS		mdsA=COMPLETE,mdsB=COMPLETE
FSIS1703199	SAMN07424780	Enteritidis	150	80485	Poultry	Georgia	9/17/17	USA:GA	USDA-FSIS		mdsA=COMPLETE,mdsB=COMPLETE
FSIS1703203	SAMN07424845	Enteritidis	150	8440	Poultry	Alabama	9/17/17	USA:AL	USDA-FSIS		mdsA=COMPLETE,mdsB=COMPLETE
FSIS1703220	SAMN07440322	Enteritidis	150	2708	Poultry	North Carolina	9/17/17	USA:NC	USDA-FSIS		mdsA=COMPLETE,mdsB=COMPLETE
FSIS1703284	SAMN07440329	Enteritidis	150	80980	Poultry	Alabama	9/17/17	USA:AL	USDA-FSIS		mdsA=COMPLETE,mdsB=COMPLETE
FSIS1703307	SAMN07440346	Enteritidis	150	8440	Poultry	Alabama	9/17/17	USA:AL	USDA-FSIS		mdsA=COMPLETE,mdsB=COMPLETE
FSIS1703446	SAMN07460783	Enteritidis	150	82190	Poultry	Georgia	9/17/17	USA:GA	USDA-FSIS		mdsA=COMPLETE,mdsB=COMPLETE
FSIS1703508	SAMN07501475	Enteritidis	150	81951	Poultry	Alabama	9/17/17	USA:AL	USDA-FSIS		mdsA=COMPLETE,mdsB=COMPLETE
FSIS1703719	SAMN07563024	Enteritidis	150	8440	Poultry	Michigan	9/17/17	USA:MI	USDA-FSIS		mdsA=COMPLETE,mdsB=COMPLETE
FSIS1703858	SAMN07563055	Enteritidis	150	83872	Poultry	Georgia	9/17/17	USA:GA	USDA-FSIS		mdsA=COMPLETE,mdsB=COMPLETE
FSIS1703865	SAMN07537126	Enteritidis	150	83367	Poultry	Pennsylvania	9/17/17	USA:PA	USDA-FSIS		mdsA=COMPLETE,mdsB=COMPLETE
FSIS1709996	SAMN06289213	Enteritidis	150	62534	Poultry	South Carolina	9/17/17	USA:SC	USDA-FSIS		mdsA=COMPLETE,mdsB=COMPLETE
FSIS1710063	SAMN06289227	Enteritidis	150	56736	Poultry	Georgia	9/17/17	USA:GA	USDA-FSIS		mdsA=COMPLETE,mdsB=COMPLETE
FSIS1710132	SAMN06286008	Enteritidis	150	62727	Poultry	New Jersey	9/17/17	USA:NJ	USDA-FSIS		mdsA=COMPLETE,mdsB=COMPLETE
FSIS1710163	SAMN06291468	Enteritidis	150	62727	Poultry	South Carolina	9/17/17	USA:SC	USDA-FSIS		mdsA=COMPLETE,mdsB=COMPLETE
FSIS1710306	SAMN06307779	Enteritidis	150	14277	Poultry	Wisconsin	9/17/17	USA:WI	USDA-FSIS		mdsA=COMPLETE,mdsB=COMPLETE
FSIS1710639	SAMN06553731	Enteritidis	150	46015	Poultry	Florida	9/17/17	USA:FL	USDA-FSIS		mdsA=COMPLETE,mdsB=COMPLETE
FSIS1710748	SAMN06710564	Enteritidis	150	8440	Poultry	Georgia	9/17/17	USA:GA	USDA-FSIS		mdsA=COMPLETE,mdsB=COMPLETE
FSIS1710752	SAMN06710554	Enteritidis	150	68600	Poultry	Oklahoma	9/17/17	USA:OK	USDA-FSIS		mdsA=COMPLETE,mdsB=COMPLETE
FSIS1710753	SAMN06710555	Enteritidis	150	8440	Poultry	Georgia	9/17/17	USA:GA	USDA-FSIS		mdsA=COMPLETE,mdsB=COMPLETE
FSIS1710754	SAMN06710556	Enteritidis	150	8440	Poultry	Alabama	9/17/17	USA:AL	USDA-FSIS		mdsA=COMPLETE,mdsB=COMPLETE
FSIS1710804	SAMN06564438	Enteritidis	150	65611	Poultry	North Carolina	9/17/17	USA:NC	USDA-FSIS		mdsA=COMPLETE,mdsB=COMPLETE
FSIS1710970	SAMN06700810	Enteritidis	150	46015	Poultry	Kansas	9/17/17	USA:KS	USDA-FSIS		mdsA=COMPLETE,mdsB=COMPLETE
FSIS21720051	SAMN07568691	Enteritidis	150	83959	Poultry	Georgia	9/17/17	USA:GA	USDA-FSIS		mdsA=COMPLETE,mdsB=COMPLETE
FSIS21720143	SAMN07633166	Enteritidis	150	72935	Poultry	New York	9/17/17	USA:NY	USDA-FSIS		mdsA=COMPLETE,mdsB=COMPLETE
FSIS21720154	SAMN07634161	Enteritidis	150	62727	Poultry	South Carolina	9/17/17	USA:SC	USDA-FSIS		mdsA=COMPLETE,mdsB=COMPLETE
FSIS21720155	SAMN07634162	Enteritidis	150	8440	Poultry	Alabama	9/17/17	USA:AL	USDA-FSIS		mdsA=COMPLETE,mdsB=COMPLETE
FSIS21720225	SAMN07703170	Enteritidis	150	88317	Poultry	Oklahoma	9/17/17	USA:OK	USDA-FSIS		mdsA=COMPLETE,mdsB=COMPLETE
FSIS21720256	SAMN07729808	Enteritidis	150	68567	Poultry	Georgia	9/17/17	USA:GA	USDA-FSIS		mdsA=COMPLETE,mdsB=COMPLETE
FSIS21720278	SAMN07731484	Enteritidis	150	8440	Poultry	Alabama	9/17/17	USA:AL	USDA-FSIS		mdsA=COMPLETE,mdsB=COMPLETE
FSIS21720429	SAMN07819113	Enteritidis	150	91802	Poultry	Mississippi	9/17/17	USA:MS	USDA-FSIS		mdsA=COMPLETE,mdsB=COMPLETE
FSIS21720485	SAMN07974201	Enteritidis	150	95897	Poultry	Michigan	9/17/17	USA:MI	USDA-FSIS		mdsA=COMPLETE,mdsB=COMPLETE
FSIS21720500	SAMN07974209	Enteritidis	150	8440	Poultry	North Carolina	9/17/17	USA:NC	USDA-FSIS		mdsA=COMPLETE,mdsB=COMPLETE
FSIS21720619	SAMN08040046	Enteritidis	150	98136	Poultry	Alabama	9/17/17	USA:AL	USDA-FSIS		mdsA=COMPLETE,mdsB=COMPLETE
FSIS21720844	SAMN08273711	Enteritidis	150	47651	Poultry	Massachusetts	9/17/17	USA:MA	USDA-FSIS		mdsA=COMPLETE,mdsB=COMPLETE
FSIS21720851	SAMN08239881	Enteritidis	150	103549	Poultry	Tennessee	9/17/17	USA:TN	USDA-FSIS		mdsA=COMPLETE,mdsB=COMPLETE
FSIS21720852	SAMN08239882	Enteritidis	150	56736	Poultry	Texas	9/17/17	USA:TX	USDA-FSIS		mdsA=COMPLETE,mdsB=COMPLETE
FSIS21720882	SAMN08273701	Enteritidis	150	8440	Poultry	Georgia	9/17/17	USA:GA	USDA-FSIS		mdsA=COMPLETE,mdsB=COMPLETE
FSIS21820910	SAMN08329921	Enteritidis	150	106135	Poultry	North Carolina	9/17/17	USA:NC	USDA-FSIS		mdsA=COMPLETE,mdsB=COMPLETE
FSIS21820955	SAMN08384053	Enteritidis	150	8440	Poultry	New York	9/17/18	USA:NY	USDA-FSIS		mdsA=COMPLETE,mdsB=COMPLETE
FSIS21821015	SAMN08436372	Enteritidis	150	8440	Poultry	Arkansas	9/17/18	USA:AR	USDA-FSIS		mdsA=COMPLETE,mdsB=COMPLETE
FSIS21821054	SAMN08499096	Enteritidis	150	47651	Poultry	Massachusetts	9/17/18	USA:MA	USDA-FSIS		mdsA=COMPLETE,mdsB=COMPLETE
FSIS21821066	SAMN08566108	Enteritidis	150	46015	Poultry	Iowa	9/17/18	USA:IA	USDA-FSIS		mdsA=COMPLETE,mdsB=COMPLETE
FSIS21821105	SAMN08545431	Enteritidis	150	109774	Poultry	North Carolina	9/17/18	USA:NC	USDA-FSIS		mdsA=COMPLETE,mdsB=COMPLETE
FSIS21821115	SAMN08568196	Enteritidis	150	8440	Poultry	North Carolina	9/17/18	USA:NC	USDA-FSIS		mdsA=COMPLETE,mdsB=COMPLETE
FSIS21821121	SAMN08568202	Enteritidis	150	80485	Poultry	Florida	9/17/18	USA:FL	USDA-FSIS		mdsA=COMPLETE,mdsB=COMPLETE
FSIS21821125	SAMN08629974	Enteritidis	150	8440	Poultry	Georgia	9/17/18	USA:GA	USDA-FSIS		mdsA=COMPLETE,mdsB=COMPLETE
FSIS21821265	SAMN08724007	Enteritidis	150	47604	Poultry	Oklahoma	9/17/18	USA:OK	USDA-FSIS		mdsA=COMPLETE,mdsB=COMPLETE
FSIS21821366	SAMN08823056	Enteritidis	150	115025	Poultry	Arkansas	9/17/18	USA:AR	USDA-FSIS		mdsA=COMPLETE,mdsB=COMPLETE
FSIS21821405	SAMN08904778	Enteritidis	150	62727	Poultry	Pennsylvania	9/17/18	USA:PA	USDA-FSIS		mdsA=COMPLETE,mdsB=COMPLETE
FSIS21821455	SAMN08959320	Enteritidis	150	4015	Poultry	California	9/17/18	USA:CA	USDA-FSIS		mdsA=COMPLETE,mdsB=COMPLETE
FSIS21821459	SAMN08959324	Enteritidis	150	68567	Poultry	Georgia	9/17/18	USA:GA	USDA-FSIS		mdsA=COMPLETE,mdsB=COMPLETE
FSIS21821484	SAMN08969975	Enteritidis	150	118027	Poultry	California	9/17/18	USA:CA	USDA-FSIS		mdsA=COMPLETE,mdsB=COMPLETE
FSIS21821737	SAMN09348066	Enteritidis	150	124387	Poultry	North Carolina	9/17/18	USA:NC	USDA-FSIS		mdsA=COMPLETE,mdsB=COMPLETE
FSIS21821820	SAMN09389816	Enteritidis	150	74481	Poultry	Kentucky	9/17/18	USA:KY	USDA-FSIS		mdsA=COMPLETE,mdsB=COMPLETE
FSIS21821861	SAMN09389884	Enteritidis	150	125874	Poultry	North Carolina	9/17/18	USA:NC	USDA-FSIS		mdsA=COMPLETE,mdsB=COMPLETE
FSIS21821892	SAMN09425592	Enteritidis	150	4015	Poultry	Alabama	9/17/18	USA:AL	USDA-FSIS		mdsA=COMPLETE,mdsB=COMPLETE
FSIS21821898	SAMN09425598	Enteritidis	150	126999	Poultry	Arkansas	9/17/18	USA:AR	USDA-FSIS		mdsA=COMPLETE,mdsB=COMPLETE
FSIS21821949	SAMN09862989	Enteritidis	150	47651	Poultry	California	9/17/18	USA:CA	USDA-FSIS		mdsA=COMPLETE,mdsB=COMPLETE
FSIS21822009	SAMN09939151	Enteritidis	150	46015	Poultry	Colorado	9/17/18	USA:CO	USDA-FSIS		mdsA=COMPLETE,mdsB=COMPLETE
FSIS21822114	SAMN10059883	Enteritidis	150	4151	Poultry	New York	9/17/18	USA:NY	USDA-FSIS		mdsA=COMPLETE,mdsB=COMPLETE
FSIS21822192	SAMN10141827	Enteritidis	150	47604	Poultry	Alabama	9/17/18	USA:AL	USDA-FSIS		mdsA=COMPLETE,mdsB=COMPLETE
FSIS21822339	SAMN10248742	Enteritidis	150	46015	Poultry	Kansas	9/17/18	USA:KS	USDA-FSIS		mdsA=COMPLETE,mdsB=COMPLETE
FSIS21822396	SAMN10269625	Enteritidis	150	147688	Poultry	California	9/17/18	USA:CA	USDA-FSIS		mdsA=COMPLETE,mdsB=COMPLETE
FSIS21822880	SAMN10527235	Enteritidis	150	156979	Poultry	Illinois	9/17/18	USA:IL	USDA-FSIS		mdsA=COMPLETE,mdsB=COMPLETE
FSIS31800082	SAMN08432340	Enteritidis	150	62565	Poultry	Missouri	9/17/18	USA:MO	USDA-FSIS		mdsA=COMPLETE,mdsB=COMPLETE
FSIS31800114	SAMN08719221	Enteritidis	150	111260	Poultry	Illinois	9/17/18	USA:IL	USDA-FSIS		mdsA=COMPLETE,mdsB=COMPLETE
FSIS31800169	SAMN08623513	Enteritidis	150	4015	Poultry	North Carolina	9/17/18	USA:NC	USDA-FSIS	sinH=PARTIUSA:AL	mdsA=COMPLETE,mdsB=COMPLETE
FSIS31800470	SAMN09259730	Enteritidis	150	123047	Poultry	Georgia	9/17/18	USA:GA	USDA-FSIS		mdsA=COMPLETE,mdsB=COMPLETE
FSIS31800568	SAMN09425899	Enteritidis	150	2708	Poultry	North Carolina	9/17/18	USA:NC	USDA-FSIS		mdsA=COMPLETE,mdsB=COMPLETE
FSIS31800571	SAMN09425901	Enteritidis	150	62727	Poultry	Georgia	9/17/18	USA:GA	USDA-FSIS		mdsA=COMPLETE,mdsB=COMPLETE
FSIS31800585	SAMN09460805	Enteritidis	150	8440	Poultry	Washington	9/17/18	USA:WA	USDA-FSIS		mdsA=COMPLETE,mdsB=COMPLETE
FSIS31800622	SAMN09501302	Enteritidis	150	8440	Poultry	Washington	9/17/18	USA:WA	USDA-FSIS		mdsA=COMPLETE,mdsB=COMPLETE
FSIS31800648	SAMN09519136	Enteritidis	150	40922	Poultry	Georgia	9/17/18	USA:GA	USDA-FSIS		mdsA=COMPLETE,mdsB=COMPLETE
FSIS31800688	SAMN09668432	Enteritidis	150	4151	Poultry	South Carolina	9/17/18	USA:SC	USDA-FSIS		mdsA=COMPLETE,mdsB=COMPLETE
FSIS31800692	SAMN09635559	Enteritidis	150	40922	Poultry	Georgia	9/17/18	USA:GA	USDA-FSIS		mdsA=COMPLETE,mdsB=COMPLETE
FSIS31800693	SAMN09635560	Enteritidis	150	68567	Poultry	Georgia	9/17/18	USA:GA	USDA-FSIS		mdsA=COMPLETE,mdsB=COMPLETE
FSIS31800742	SAMN09652708	Enteritidis	150	68567	Poultry	Georgia	9/17/18	USA:GA	USDA-FSIS		mdsA=COMPLETE,mdsB=COMPLETE
FSIS31800756	SAMN09789492	Enteritidis	150	8440	Poultry	Illinois	9/17/18	USA:IL	USDA-FSIS		mdsA=COMPLETE,mdsB=COMPLETE
FSIS31800963	SAMN09950677	Enteritidis	150	46015	Poultry	Colorado	9/17/18	USA:CO	USDA-FSIS		mdsA=COMPLETE,mdsB=COMPLETE
PNUSAS040595	SAMN09206731	Enteritidis	165	165	Human	Florida	4/5/18	USA:FL	CDC		mdsA=COMPLETE,mdsB=COMPLETE
PNUSAS040570	SAMN09197808	Enteritidis	165	165	Human	Florida	3/15/18	USA:FL	CDC		mdsA=COMPLETE,mdsB=COMPLETE
PNUSAS011947	SAMN06756755	Enteritidis	165	165	Human	Florida	3/22/17	USA:FL	CDC		mdsA=COMPLETE,mdsB=COMPLETE
FSIS11705165	SAMN07987829	Enteritidis	165	165	Poultry	Washington	9/17/17	USA:WA	USDA-FSIS	sinH=PARTIUSA:AL	mdsA=COMPLETE,mdsB=COMPLETE
FSIS11705689	SAMN08052667	Enteritidis	165	62869	Poultry	South Carolina	9/17/17	USA:SC	USDA-FSIS		mdsA=COMPLETE,mdsB=COMPLETE
FSIS11807108	SAMN08581883	Enteritidis	165	110286	Poultry	South Carolina	9/17/17	USA:SC	USDA-FSIS		mdsA=COMPLETE,mdsB=COMPLETE
FSIS11807614	SAMN08554056	Enteritidis	165	165	Poultry	South Carolina	9/17/18	USA:SC	USDA-FSIS		mdsA=COMPLETE,mdsB=COMPLETE
FSIS11811759	SAMN09655781	Enteritidis	165	165	Poultry	Massachusetts	9/17/18	USA:MA	USDA-FSIS		mdsA=COMPLETE,mdsB=COMPLETE
FSIS11812199	SAMN09730244	Enteritidis	165	138945	Poultry	South Carolina	9/17/18	USA:SC	USDA-FSIS		mdsA=COMPLETE,mdsB=COMPLETE
FSIS11814665	SAMN10242813	Enteritidis	165	147101	Poultry	New Jersey	9/17/18	USA:NJ	USDA-FSIS		mdsA=COMPLETE,mdsB=COMPLETE
FSIS11815311	SAMN10389877	Enteritidis	165	147101	Poultry	Massachusetts	9/17/18	USA:MA	USDA-FSIS		mdsA=COMPLETE,mdsB=COMPLETE
FSIS1700090	SAMN06700282	Enteritidis	165	62869	Poultry	South Carolina	9/17/17	USA:SC	USDA-FSIS		mdsA=COMPLETE,mdsB=COMPLETE
FSIS1701123	SAMN07173177	Enteritidis	165	165	Poultry	South Carolina	9/17/17	USA:SC	USDA-FSIS		mdsA=COMPLETE,mdsB=COMPLETE
FSIS1703654	SAMN07536021	Enteritidis	165	83325	Poultry	Massachusetts	9/17/17	USA:MA	USDA-FSIS		mdsA=COMPLETE,mdsB=COMPLETE
FSIS1710162	SAMN06291467	Enteritidis	165	165	Poultry	Washington	9/17/17	USA:WA	USDA-FSIS		mdsA=COMPLETE,mdsB=COMPLETE
FSIS1710317	SAMN06295712	Enteritidis	165	62869	Poultry	South Carolina	9/17/17	USA:SC	USDA-FSIS		mdsA=COMPLETE,mdsB=COMPLETE
FSIS1710647	SAMN06708712	Enteritidis	165	165	Poultry	Washington	9/17/17	USA:WA	USDA-FSIS		mdsA=COMPLETE,mdsB=COMPLETE
FSIS21720358	SAMN07819009	Enteritidis	165	93887	Poultry	Massachusetts	9/17/17	USA:MA	USDA-FSIS		mdsA=COMPLETE,mdsB=COMPLETE
FSIS21821669	SAMN09230399	Enteritidis	165	165	Poultry	Massachusetts	9/17/18	USA:MA	USDA-FSIS		mdsA=COMPLETE,mdsB=COMPLETE
FSIS21821895	SAMN09425595	Enteritidis	165	127003	Poultry	Massachusetts	9/17/18	USA:MA	USDA-FSIS		mdsA=COMPLETE,mdsB=COMPLETE
FSIS31800337	SAMN09007201	Enteritidis	165	165	Poultry	Washington	9/17/18	USA:WA	USDA-FSIS	sinH=PARTIUSA:AL	mdsA=COMPLETE,mdsB=COMPLETE
FSIS31800830	SAMN09789499	Enteritidis	165	165	Poultry	Massachusetts	9/17/18	USA:MA	USDA-FSIS		mdsA=COMPLETE,mdsB=COMPLETE
PNUSAS055785	SAMN10133814	Enteritidis	182	114205	Human	Florida	5/30/18	USA:FL	CDC		mdsA=COMPLETE,mdsB=COMPLETE
PNUSAS048845	SAMN09763806	Enteritidis	182	117653	Human	Florida	4/26/18	USA:FL	CDC		mdsA=COMPLETE,mdsB=COMPLETE
PNUSAS049968	SAMN09813333	Enteritidis	182	83883	Human	Florida	5/20/18	USA:FL	CDC		mdsA=COMPLETE,mdsB=COMPLETE
PNUSAS040572	SAMN09206698	Enteritidis	182	3334	Human	Florida	3/21/18	USA:FL	CDC		mdsA=COMPLETE,mdsB=COMPLETE
PNUSAS017645	SAMN07370926	Enteritidis	182	3132	Human	Florida	4/10/17	USA:FL	CDC		mdsA=COMPLETE,mdsB=COMPLETE
PNUSAS017051	SAMN07352800	Enteritidis	182	41659	Human	Florida	5/5/17	USA:FL	CDC		mdsA=COMPLETE,mdsB=COMPLETE
PNUSAS017039	SAMN07342233	Enteritidis	182	3334	Human	Florida	5/2/17	USA:FL	CDC		mdsA=COMPLETE,mdsB=COMPLETE
PNUSAS016950	SAMN07342215	Enteritidis	182	60809	Human	Florida	3/23/17	USA:FL	CDC	sinH=PARTIUSA:AL	mdsA=COMPLETE,mdsB=COMPLETE
PNUSAS016340	SAMN07269336	Enteritidis	182	41659	Human	Florida	3/27/17	USA:FL	CDC		mdsA=COMPLETE,mdsB=COMPLETE
PNUSAS015125	SAMN07202688	Enteritidis	182	63076	Human	Florida	5/2/17	USA:FL	CDC		mdsA=COMPLETE,mdsB=COMPLETE
PNUSAS015113	SAMN07202676	Enteritidis	182	64255	Human	Florida	5/11/17	USA:FL	CDC		mdsA=COMPLETE,mdsB=COMPLETE
PNUSAS014738	SAMN07197357	Enteritidis	182	41659	Human	Florida	4/25/17	USA:FL	CDC		mdsA=COMPLETE,mdsB=COMPLETE
PNUSAS038671	SAMN08955949	Enteritidis	182	41659	Human	Florida	2/18/18	USA:FL	CDC	sinH=PARTIUSA:AL	mdsA=COMPLETE,mdsB=COMPLETE
PNUSAS038670	SAMN08955950	Enteritidis	182	41659	Human	Florida	2/17/18	USA:FL	CDC	sinH=PARTIUSA:AL	mdsA=COMPLETE,mdsB=COMPLETE
FSIS11703983	SAMN07565867	Enteritidis	182	65741	Poultry	Alabama	9/17/17	USA:AL	USDA-FSIS		mdsA=COMPLETE,mdsB=COMPLETE
FSIS11704137	SAMN07629741	Enteritidis	182	86452	Poultry	Arkansas	9/17/17	USA:AR	USDA-FSIS	sinH=PARTIUSA:AL	mdsA=COMPLETE,mdsB=COMPLETE
FSIS11704369	SAMN07672000	Enteritidis	182	64255	Poultry	Alabama	9/17/17	USA:AL	USDA-FSIS		mdsA=COMPLETE,mdsB=COMPLETE
FSIS11704445	SAMN07714847	Enteritidis	182	9202	Poultry	Washington	9/17/17	USA:WA	USDA-FSIS		mdsA=COMPLETE,mdsB=COMPLETE
FSIS11704676	SAMN07775025	Enteritidis	182	41659	Poultry	Alabama	9/17/17	USA:AL	USDA-FSIS		mdsA=COMPLETE,mdsB=COMPLETE
FSIS11704677	SAMN07775026	Enteritidis	182	60809	Poultry	Georgia	9/17/17	USA:GA	USDA-FSIS		mdsA=COMPLETE,mdsB=COMPLETE
FSIS11704933	SAMN08051562	Enteritidis	182	98951	Poultry	Mississippi	9/17/17	USA:MS	USDA-FSIS		mdsA=COMPLETE,mdsB=COMPLETE
FSIS11704949	SAMN07955759	Enteritidis	182	95112	Poultry	Alabama	9/17/17	USA:AL	USDA-FSIS		mdsA=COMPLETE,mdsB=COMPLETE
FSIS11705146	SAMN07955817	Enteritidis	182	2668	Poultry	Virginia	9/17/17	USA:VA	USDA-FSIS		mdsA=COMPLETE,mdsB=COMPLETE
FSIS11705357	SAMN08114341	Enteritidis	182	32607	Poultry	Arkansas	9/17/17	USA:AR	USDA-FSIS		mdsA=COMPLETE,mdsB=COMPLETE
FSIS11705455	SAMN08025073	Enteritidis	182	41659	Poultry	Colorado	9/17/17	USA:CO	USDA-FSIS		mdsA=COMPLETE,mdsB=COMPLETE
FSIS11705469	SAMN08051571	Enteritidis	182	98952	Poultry	Arkansas	9/17/17	USA:AR	USDA-FSIS		mdsA=COMPLETE,mdsB=COMPLETE
FSIS11705472	SAMN08052652	Enteritidis	182	182	Poultry	Delaware	9/17/17	USA:DE	USDA-FSIS		mdsA=COMPLETE,mdsB=COMPLETE
FSIS11706040	SAMN08141493	Enteritidis	182	73663	Poultry	Illinois	9/17/17	USA:IL	USDA-FSIS		mdsA=COMPLETE,mdsB=COMPLETE
FSIS11706060	SAMN08138555	Enteritidis	182	182	Poultry	New York	9/17/17	USA:NY	USDA-FSIS		mdsA=COMPLETE,mdsB=COMPLETE
FSIS11706196	SAMN08169335	Enteritidis	182	101899	Poultry	South Carolina	9/17/17	USA:SC	USDA-FSIS		mdsA=COMPLETE,mdsB=COMPLETE
FSIS11706512	SAMN08243988	Enteritidis	182	2668	Poultry	Virginia	9/17/17	USA:VA	USDA-FSIS		mdsA=COMPLETE,mdsB=COMPLETE
FSIS11706519	SAMN08244053	Enteritidis	182	63076	Poultry	Florida	9/17/17	USA:FL	USDA-FSIS		mdsA=COMPLETE,mdsB=COMPLETE
FSIS11706539	SAMN08291423	Enteritidis	182	101899	Poultry	South Carolina	9/17/17	USA:SC	USDA-FSIS		mdsA=COMPLETE,mdsB=COMPLETE
FSIS11706811	SAMN08291470	Enteritidis	182	63076	Poultry	Oklahoma	9/17/17	USA:OK	USDA-FSIS		mdsA=COMPLETE,mdsB=COMPLETE
FSIS11807012	SAMN08377176	Enteritidis	182	3132	Poultry	Arkansas	9/17/17	USA:AR	USDA-FSIS		mdsA=COMPLETE,mdsB=COMPLETE
FSIS11807118	SAMN08407935	Enteritidis	182	70416	Poultry	Arkansas	9/17/17	USA:AR	USDA-FSIS		mdsA=COMPLETE,mdsB=COMPLETE
FSIS11807120	SAMN08407937	Enteritidis	182	106859	Poultry	Arkansas	9/17/17	USA:AR	USDA-FSIS		mdsA=COMPLETE,mdsB=COMPLETE
FSIS11807209	SAMN08386877	Enteritidis	182	41659	Poultry	California	9/17/17	USA:CA	USDA-FSIS		mdsA=COMPLETE,mdsB=COMPLETE
FSIS11807288	SAMN08437310	Enteritidis	182	3334	Poultry	Alabama	9/17/18	USA:AL	USDA-FSIS		mdsA=COMPLETE,mdsB=COMPLETE
FSIS11807600	SAMN08554063	Enteritidis	182	3132	Poultry	Alabama	9/17/18	USA:AL	USDA-FSIS		mdsA=COMPLETE,mdsB=COMPLETE
FSIS11807603	SAMN08554066	Enteritidis	182	83883	Poultry	Pennsylvania	9/17/18	USA:PA	USDA-FSIS		mdsA=COMPLETE,mdsB=COMPLETE
FSIS11807765	SAMN08581701	Enteritidis	182	41659	Poultry	Texas	9/17/18	USA:TX	USDA-FSIS		mdsA=COMPLETE,mdsB=COMPLETE
FSIS11807773	SAMN08581893	Enteritidis	182	110298	Poultry	Alabama	9/17/18	USA:AL	USDA-FSIS		mdsA=COMPLETE,mdsB=COMPLETE
FSIS11807775	SAMN08581705	Enteritidis	182	110465	Poultry	Illinois	9/17/18	USA:IL	USDA-FSIS		mdsA=COMPLETE,mdsB=COMPLETE
FSIS11808140	SAMN08663227	Enteritidis	182	152303	Poultry	Illinois	9/17/18	USA:IL	USDA-FSIS		mdsA=COMPLETE,mdsB=COMPLETE
FSIS11808357	SAMN08723985	Enteritidis	182	113784	Poultry	Alabama	9/17/18	USA:AL	USDA-FSIS		mdsA=COMPLETE,mdsB=COMPLETE
FSIS11808362	SAMN08723989	Enteritidis	182	41659	Poultry	Mississippi	9/17/18	USA:MS	USDA-FSIS		mdsA=COMPLETE,mdsB=COMPLETE
FSIS11808374	SAMN08851621	Enteritidis	182	117653	Poultry	Massachusetts	9/17/18	USA:MA	USDA-FSIS		mdsA=COMPLETE,mdsB=COMPLETE
FSIS11808383	SAMN08851628	Enteritidis	182	115872	Poultry	Alabama	9/17/18	USA:AL	USDA-FSIS		mdsA=COMPLETE,mdsB=COMPLETE
FSIS11808387	SAMN08851630	Enteritidis	182	182	Poultry	Illinois	9/17/18	USA:IL	USDA-FSIS		mdsA=COMPLETE,mdsB=COMPLETE
FSIS11808478	SAMN08851704	Enteritidis	182	70416	Poultry	Arkansas	9/17/18	USA:AR	USDA-FSIS		mdsA=COMPLETE,mdsB=COMPLETE
FSIS11808630	SAMN08816100	Enteritidis	182	70416	Poultry	Arkansas	9/17/18	USA:AR	USDA-FSIS		mdsA=COMPLETE,mdsB=COMPLETE
FSIS11808684	SAMN08851645	Enteritidis	182	3334	Poultry	Michigan	9/17/18	USA:MI	USDA-FSIS		mdsA=COMPLETE,mdsB=COMPLETE
FSIS11808858	SAMN08886769	Enteritidis	182	64255	Poultry	Illinois	9/17/18	USA:IL	USDA-FSIS		mdsA=COMPLETE,mdsB=COMPLETE
FSIS11808961	SAMN08950950	Enteritidis	182	41659	Poultry	Texas	9/17/18	USA:TX	USDA-FSIS		mdsA=COMPLETE,mdsB=COMPLETE
FSIS11808995	SAMN08921934	Enteritidis	182	116580	Poultry	Illinois	9/17/18	USA:IL	USDA-FSIS		mdsA=COMPLETE,mdsB=COMPLETE
FSIS11809082	SAMN08930746	Enteritidis	182	117008	Poultry	Mississippi	9/17/18	USA:MS	USDA-FSIS		mdsA=COMPLETE,mdsB=COMPLETE
FSIS11809550	SAMN09013813	Enteritidis	182	3132	Poultry	California	9/17/18	USA:CA	USDA-FSIS		mdsA=COMPLETE,mdsB=COMPLETE
FSIS11809580	SAMN09090979	Enteritidis	182	120171	Poultry	Florida	9/17/18	USA:FL	USDA-FSIS		mdsA=COMPLETE,mdsB=COMPLETE
FSIS11809591	SAMN09214559	Enteritidis	182	64255	Poultry	Ohio	9/17/18	USA:OH	USDA-FSIS		mdsA=COMPLETE,mdsB=COMPLETE
FSIS11809804	SAMN09214555	Enteritidis	182	121559	Poultry	Illinois	9/17/18	USA:IL	USDA-FSIS		mdsA=COMPLETE,mdsB=COMPLETE
FSIS11809890	SAMN09225145	Enteritidis	182	101899	Poultry	Ohio	9/17/18	USA:OH	USDA-FSIS		mdsA=COMPLETE,mdsB=COMPLETE
FSIS11809915	SAMN09284848	Enteritidis	182	182	Poultry	Georgia	9/17/18	USA:GA	USDA-FSIS		mdsA=COMPLETE,mdsB=COMPLETE
FSIS11810099	SAMN09444093	Enteritidis	182	41659	Poultry	New Jersey	9/17/18	USA:NJ	USDA-FSIS		mdsA=COMPLETE,mdsB=COMPLETE
FSIS11810212	SAMN09372587	Enteritidis	182	124757	Poultry	Arkansas	9/17/18	USA:AR	USDA-FSIS		mdsA=COMPLETE,mdsB=COMPLETE
FSIS11810277	SAMN09372594	Enteritidis	182	3334	Poultry	Mississippi	9/17/18	USA:MS	USDA-FSIS		mdsA=COMPLETE,mdsB=COMPLETE
FSIS11810299	SAMN09372614	Enteritidis	182	49220	Poultry	Mississippi	9/17/18	USA:MS	USDA-FSIS		mdsA=COMPLETE,mdsB=COMPLETE
FSIS11810451	SAMN09489328	Enteritidis	182	101899	Poultry	North Carolina	9/17/18	USA:NC	USDA-FSIS		mdsA=COMPLETE,mdsB=COMPLETE
FSIS11810454	SAMN09395799	Enteritidis	182	126076	Poultry	Michigan	9/17/18	USA:MI	USDA-FSIS		mdsA=COMPLETE,mdsB=COMPLETE
FSIS11810473	SAMN09395613	Enteritidis	182	64255	Poultry	North Carolina	9/17/18	USA:NC	USDA-FSIS		mdsA=COMPLETE,mdsB=COMPLETE
FSIS11810740	SAMN09462593	Enteritidis	182	121559	Poultry	California	9/17/18	USA:CA	USDA-FSIS		mdsA=COMPLETE,mdsB=COMPLETE
FSIS11810862	SAMN09533139	Enteritidis	182	3132	Poultry	California	9/17/18	USA:CA	USDA-FSIS		mdsA=COMPLETE,mdsB=COMPLETE
FSIS11810947	SAMN09479623	Enteritidis	182	130406	Poultry	Alabama	9/17/18	USA:AL	USDA-FSIS		mdsA=COMPLETE,mdsB=COMPLETE
FSIS11810949	SAMN09479625	Enteritidis	182	130424	Poultry	Virginia	9/17/18	USA:VA	USDA-FSIS		mdsA=COMPLETE,mdsB=COMPLETE
FSIS11810961	SAMN09479635	Enteritidis	182	3132	Poultry	Florida	9/17/18	USA:FL	USDA-FSIS		mdsA=COMPLETE,mdsB=COMPLETE
FSIS11811133	SAMN09545726	Enteritidis	182	134980	Poultry	California	9/17/18	USA:CA	USDA-FSIS		mdsA=COMPLETE,mdsB=COMPLETE
FSIS11811139	SAMN09501175	Enteritidis	182	3334	Poultry	Georgia	9/17/18	USA:GA	USDA-FSIS		mdsA=COMPLETE,mdsB=COMPLETE
FSIS11811257	SAMN09534912	Enteritidis	182	2668	Poultry	Virginia	9/17/18	USA:VA	USDA-FSIS		mdsA=COMPLETE,mdsB=COMPLETE
FSIS11811408	SAMN09690025	Enteritidis	182	3132	Poultry	Iowa	9/17/18	USA:IA	USDA-FSIS		mdsA=COMPLETE,mdsB=COMPLETE
FSIS11811422	SAMN09624549	Enteritidis	182	135578	Poultry	Alabama	9/17/18	USA:AL	USDA-FSIS		mdsA=COMPLETE,mdsB=COMPLETE
FSIS11811428	SAMN09741875	Enteritidis	182	101899	Poultry	South Carolina	9/17/18	USA:SC	USDA-FSIS		mdsA=COMPLETE,mdsB=COMPLETE
FSIS11811483	SAMN09624552	Enteritidis	182	3132	Poultry	Washington	9/17/18	USA:WA	USDA-FSIS		mdsA=COMPLETE,mdsB=COMPLETE
FSIS11811499	SAMN09633823	Enteritidis	182	101899	Poultry	South Carolina	9/17/18	USA:SC	USDA-FSIS		mdsA=COMPLETE,mdsB=COMPLETE
FSIS11811657	SAMN09651393	Enteritidis	182	101899	Poultry	South Carolina	9/17/18	USA:SC	USDA-FSIS		mdsA=COMPLETE,mdsB=COMPLETE
FSIS11811724	SAMN09693193	Enteritidis	182	129246	Poultry	California	9/17/18	USA:CA	USDA-FSIS		mdsA=COMPLETE,mdsB=COMPLETE
FSIS11811751	SAMN09655773	Enteritidis	182	117653	Poultry	Georgia	9/17/18	USA:GA	USDA-FSIS		mdsA=COMPLETE,mdsB=COMPLETE
FSIS11811753	SAMN09655775	Enteritidis	182	3132	Poultry	California	9/17/18	USA:CA	USDA-FSIS		mdsA=COMPLETE,mdsB=COMPLETE
FSIS11811771	SAMN09666586	Enteritidis	182	138410	Poultry	California	9/17/18	USA:CA	USDA-FSIS		mdsA=COMPLETE,mdsB=COMPLETE
FSIS11811989	SAMN09684039	Enteritidis	182	3334	Poultry	South Carolina	9/17/18	USA:SC	USDA-FSIS		mdsA=COMPLETE,mdsB=COMPLETE
FSIS11812031	SAMN09727454	Enteritidis	182	140134	Poultry	Washington	9/17/18	USA:WA	USDA-FSIS		mdsA=COMPLETE,mdsB=COMPLETE
FSIS11812193	SAMN09730238	Enteritidis	182	3334	Poultry	Georgia	9/17/18	USA:GA	USDA-FSIS		mdsA=COMPLETE,mdsB=COMPLETE
FSIS11812210	SAMN09730285	Enteritidis	182	41659	Poultry	California	9/17/18	USA:CA	USDA-FSIS		mdsA=COMPLETE,mdsB=COMPLETE
FSIS11812225	SAMN09730309	Enteritidis	182	138888	Poultry	Florida	9/17/18	USA:FL	USDA-FSIS		mdsA=COMPLETE,mdsB=COMPLETE
FSIS11812487	SAMN09769699	Enteritidis	182	139279	Poultry	Texas	9/17/18	USA:TX	USDA-FSIS		mdsA=COMPLETE,mdsB=COMPLETE
FSIS11812552	SAMN09784443	Enteritidis	182	139645	Poultry	Texas	9/17/18	USA:TX	USDA-FSIS		mdsA=COMPLETE,mdsB=COMPLETE
FSIS11813000	SAMN09828501	Enteritidis	182	3334	Poultry	California	9/17/18	USA:CA	USDA-FSIS		mdsA=COMPLETE,mdsB=COMPLETE
FSIS11813290	SAMN09933750	Enteritidis	182	129632	Poultry	Texas	9/17/18	USA:TX	USDA-FSIS		mdsA=COMPLETE,mdsB=COMPLETE
FSIS11813710	SAMN09980241	Enteritidis	182	3132	Poultry	Mississippi	9/17/18	USA:MS	USDA-FSIS		mdsA=COMPLETE,mdsB=COMPLETE
FSIS11813711	SAMN09980242	Enteritidis	182	3132	Poultry	Mississippi	9/17/18	USA:MS	USDA-FSIS		mdsA=COMPLETE,mdsB=COMPLETE
FSIS11813720	SAMN10129912	Enteritidis	182	145119	Poultry	Florida	9/17/18	USA:FL	USDA-FSIS		mdsA=COMPLETE,mdsB=COMPLETE
FSIS11813793	SAMN10033103	Enteritidis	182	129632	Poultry	Texas	9/17/18	USA:TX	USDA-FSIS		mdsA=COMPLETE,mdsB=COMPLETE
FSIS11814478	SAMN10161396	Enteritidis	182	2668	Poultry	Missouri	9/17/18	USA:MO	USDA-FSIS		mdsA=COMPLETE,mdsB=COMPLETE
FSIS11814501	SAMN10177763	Enteritidis	182	2668	Poultry	Michigan	9/17/18	USA:MI	USDA-FSIS		mdsA=COMPLETE,mdsB=COMPLETE
FSIS11814668	SAMN10242816	Enteritidis	182	2668	Poultry	Tennessee	9/17/18	USA:TN	USDA-FSIS		mdsA=COMPLETE,mdsB=COMPLETE
FSIS11814860	SAMN10258663	Enteritidis	182	110298	Poultry	Alabama	9/17/18	USA:AL	USDA-FSIS		mdsA=COMPLETE,mdsB=COMPLETE
FSIS11815094	SAMN10379139	Enteritidis	182	49220	Poultry	Kentucky	9/17/18	USA:KY	USDA-FSIS		mdsA=COMPLETE,mdsB=COMPLETE
FSIS11815720	SAMN10458817	Enteritidis	182	3334	Poultry	Alabama	9/17/18	USA:AL	USDA-FSIS		mdsA=COMPLETE,mdsB=COMPLETE
FSIS11815742	SAMN10458811	Enteritidis	182	49220	Poultry	Florida	9/17/18	USA:FL	USDA-FSIS		mdsA=COMPLETE,mdsB=COMPLETE
FSIS11816508	SAMN10638600	Enteritidis	182	163018	Poultry	Virginia	9/17/18	USA:VA	USDA-FSIS		mdsA=COMPLETE,mdsB=COMPLETE
FSIS11816551	SAMN10656558	Enteritidis	182	163392	Poultry	Virginia	9/17/18	USA:VA	USDA-FSIS		mdsA=COMPLETE,mdsB=COMPLETE
FSIS11816729	SAMN10645619	Enteritidis	182	163260	Poultry	Mississippi	9/17/18	USA:MS	USDA-FSIS		mdsA=COMPLETE,mdsB=COMPLETE
FSIS1700022	SAMN06701832	Enteritidis	182	41659	Poultry	Alabama	9/17/17	USA:AL	USDA-FSIS		mdsA=COMPLETE,mdsB=COMPLETE
FSIS1700102	SAMN06701495	Enteritidis	182	53714	Poultry	Virginia	9/17/17	USA:VA	USDA-FSIS	sinH=PARTIUSA:AL	mdsA=COMPLETE,mdsB=COMPLETE
FSIS1700165	SAMN06708704	Enteritidis	182	3334	Poultry	Alabama	9/17/17	USA:AL	USDA-FSIS		mdsA=COMPLETE,mdsB=COMPLETE
FSIS1700185	SAMN06754679	Enteritidis	182	3334	Poultry	Washington	9/17/17	USA:WA	USDA-FSIS		mdsA=COMPLETE,mdsB=COMPLETE
FSIS1700458	SAMN07141724	Enteritidis	182	53886	Poultry	Mississippi	9/17/17	USA:MS	USDA-FSIS		mdsA=COMPLETE,mdsB=COMPLETE
FSIS1700592	SAMN06899442	Enteritidis	182	70416	Poultry	Arkansas	9/17/17	USA:AR	USDA-FSIS		mdsA=COMPLETE,mdsB=COMPLETE
FSIS1700610	SAMN06860599	Enteritidis	182	182	Poultry	Indiana	9/17/17	USA:IN	USDA-FSIS		mdsA=COMPLETE,mdsB=COMPLETE
FSIS1700725	SAMN07206077	Enteritidis	182	73663	Poultry	Alabama	9/17/17	USA:AL	USDA-FSIS		mdsA=COMPLETE,mdsB=COMPLETE
FSIS1700800	SAMN06915433	Enteritidis	182	182	Poultry	Michigan	9/17/17	USA:MI	USDA-FSIS		mdsA=COMPLETE,mdsB=COMPLETE
FSIS1700876	SAMN07193980	Enteritidis	182	3132	Poultry	Alabama	9/17/17	USA:AL	USDA-FSIS		mdsA=COMPLETE,mdsB=COMPLETE
FSIS1700896	SAMN07152009	Enteritidis	182	182	Poultry	Michigan	9/17/17	USA:MI	USDA-FSIS		mdsA=COMPLETE,mdsB=COMPLETE
FSIS1700928	SAMN07190231	Enteritidis	182	70416	Poultry	Pennsylvania	9/17/17	USA:PA	USDA-FSIS		mdsA=COMPLETE,mdsB=COMPLETE
FSIS1701096	SAMN07159203	Enteritidis	182	52346	Poultry	Texas	9/17/17	USA:TX	USDA-FSIS		mdsA=COMPLETE,mdsB=COMPLETE
FSIS1701097	SAMN07159204	Enteritidis	182	72469	Poultry	Texas	9/17/17	USA:TX	USDA-FSIS		mdsA=COMPLETE,mdsB=COMPLETE
FSIS1701111	SAMN07152183	Enteritidis	182	3334	Poultry	Colorado	9/17/17	USA:CO	USDA-FSIS		mdsA=COMPLETE,mdsB=COMPLETE
FSIS1701314	SAMN07195285	Enteritidis	182	9202	Poultry	Washington	9/17/17	USA:WA	USDA-FSIS		mdsA=COMPLETE,mdsB=COMPLETE
FSIS1701472	SAMN07237752	Enteritidis	182	3132	Poultry	Arkansas	9/17/17	USA:AR	USDA-FSIS		mdsA=COMPLETE,mdsB=COMPLETE
FSIS1701548	SAMN07190198	Enteritidis	182	73898	Poultry	North Carolina	9/17/17	USA:NC	USDA-FSIS		mdsA=COMPLETE,mdsB=COMPLETE
FSIS1701638	SAMN07237082	Enteritidis	182	74983	Poultry	Arkansas	9/17/17	USA:AR	USDA-FSIS		mdsA=COMPLETE,mdsB=COMPLETE
FSIS1701679	SAMN07237687	Enteritidis	182	41659	Poultry	Texas	9/17/17	USA:TX	USDA-FSIS		mdsA=COMPLETE,mdsB=COMPLETE
FSIS1701704	SAMN07230010	Enteritidis	182	182	Poultry	Michigan	9/17/17	USA:MI	USDA-FSIS		mdsA=COMPLETE,mdsB=COMPLETE
FSIS1701970	SAMN07373355	Enteritidis	182	79319	Poultry	Arkansas	9/17/17	USA:AR	USDA-FSIS		mdsA=COMPLETE,mdsB=COMPLETE
FSIS1702016	SAMN07271453	Enteritidis	182	3334	Poultry	California	9/17/17	USA:CA	USDA-FSIS		mdsA=COMPLETE,mdsB=COMPLETE
FSIS1702150	SAMN07237135	Enteritidis	182	2668	Poultry	Virginia	9/17/17	USA:VA	USDA-FSIS		mdsA=COMPLETE,mdsB=COMPLETE
FSIS1702156	SAMN07271440	Enteritidis	182	75753	Poultry	Washington	9/17/17	USA:WA	USDA-FSIS		mdsA=COMPLETE,mdsB=COMPLETE
FSIS1702237	SAMN07283975	Enteritidis	182	50778	Poultry	Texas	9/17/17	USA:TX	USDA-FSIS		mdsA=COMPLETE,mdsB=COMPLETE
FSIS1702309	SAMN07304803	Enteritidis	182	3132	Poultry	Arkansas	9/17/17	USA:AR	USDA-FSIS		mdsA=COMPLETE,mdsB=COMPLETE
FSIS1702428	SAMN07371032	Enteritidis	182	3334	Poultry	Alabama	9/17/17	USA:AL	USDA-FSIS		mdsA=COMPLETE,mdsB=COMPLETE
FSIS1702432	SAMN07975009	Enteritidis	182	70416	Poultry	Arkansas	9/17/17	USA:AR	USDA-FSIS		mdsA=COMPLETE,mdsB=COMPLETE
FSIS1702540	SAMN07327503	Enteritidis	182	75371	Poultry	Louisiana	9/17/17	USA:LA	USDA-FSIS		mdsA=COMPLETE,mdsB=COMPLETE
FSIS1702592	SAMN07340485	Enteritidis	182	77806	Poultry	Washington	9/17/17	USA:WA	USDA-FSIS		mdsA=COMPLETE,mdsB=COMPLETE
FSIS1702705	SAMN07371076	Enteritidis	182	72469	Poultry	California	9/17/17	USA:CA	USDA-FSIS		mdsA=COMPLETE,mdsB=COMPLETE
FSIS1703098	SAMN07424841	Enteritidis	182	64255	Poultry	Indiana	9/17/17	USA:IN	USDA-FSIS		mdsA=COMPLETE,mdsB=COMPLETE
FSIS1703198	SAMN07424779	Enteritidis	182	80480	Poultry	Alabama	9/17/17	USA:AL	USDA-FSIS		mdsA=COMPLETE,mdsB=COMPLETE
FSIS1703296	SAMN07440335	Enteritidis	182	3334	Poultry	Alabama	9/17/17	USA:AL	USDA-FSIS		mdsA=COMPLETE,mdsB=COMPLETE
FSIS1703320	SAMN07450981	Enteritidis	182	3334	Poultry	California	9/17/17	USA:CA	USDA-FSIS		mdsA=COMPLETE,mdsB=COMPLETE
FSIS1703451	SAMN07536033	Enteritidis	182	41659	Poultry	Mississippi	9/17/17	USA:MS	USDA-FSIS		mdsA=COMPLETE,mdsB=COMPLETE
FSIS1703717	SAMN07563022	Enteritidis	182	41659	Poultry	Florida	9/17/17	USA:FL	USDA-FSIS		mdsA=COMPLETE,mdsB=COMPLETE
FSIS1703737	SAMN07563037	Enteritidis	182	83883	Poultry	Georgia	9/17/17	USA:GA	USDA-FSIS		mdsA=COMPLETE,mdsB=COMPLETE
FSIS1710004	SAMN06307789	Enteritidis	182	63076	Poultry	Arkansas	9/17/17	USA:AR	USDA-FSIS		mdsA=COMPLETE,mdsB=COMPLETE
FSIS1710187	SAMN06328372	Enteritidis	182	50778	Poultry	Alabama	9/17/17	USA:AL	USDA-FSIS		mdsA=COMPLETE,mdsB=COMPLETE
FSIS1710248	SAMN06328344	Enteritidis	182	50778	Poultry	Alabama	9/17/17	USA:AL	USDA-FSIS		mdsA=COMPLETE,mdsB=COMPLETE
FSIS1710403	SAMN06602777	Enteritidis	182	182	Poultry	Indiana	9/17/17	USA:IN	USDA-FSIS		mdsA=COMPLETE,mdsB=COMPLETE
FSIS1710571	SAMN06602723	Enteritidis	182	65933	Poultry	Virginia	9/17/17	USA:VA	USDA-FSIS		mdsA=COMPLETE,mdsB=COMPLETE
FSIS1710629	SAMN06602875	Enteritidis	182	65914	Poultry	Texas	9/17/17	USA:TX	USDA-FSIS		mdsA=COMPLETE,mdsB=COMPLETE
FSIS1710634	SAMN06602880	Enteritidis	182	3334	Poultry	Texas	9/17/17	USA:TX	USDA-FSIS		mdsA=COMPLETE,mdsB=COMPLETE
FSIS1710881	SAMN06642019	Enteritidis	182	66955	Poultry	Virginia	9/17/17	USA:VA	USDA-FSIS		mdsA=COMPLETE,mdsB=COMPLETE
FSIS1710955	SAMN06624564	Enteritidis	182	41659	Poultry	Georgia	9/17/17	USA:GA	USDA-FSIS		mdsA=COMPLETE,mdsB=COMPLETE
FSIS1711041	SAMN06826832	Enteritidis	182	3132	Poultry	Alabama	9/17/17	USA:AL	USDA-FSIS		mdsA=COMPLETE,mdsB=COMPLETE
FSIS1711053	SAMN06647816	Enteritidis	182	182	Poultry	Indiana	9/17/17	USA:IN	USDA-FSIS		mdsA=COMPLETE,mdsB=COMPLETE
FSIS1711065	SAMN06701508	Enteritidis	182	3334	Poultry	Alabama	9/17/17	USA:AL	USDA-FSIS		mdsA=COMPLETE,mdsB=COMPLETE
FSIS21720031	SAMN07552037	Enteritidis	182	182	Poultry	New Jersey	9/17/17	USA:NJ	USDA-FSIS		mdsA=COMPLETE,mdsB=COMPLETE
FSIS21720163	SAMN07634915	Enteritidis	182	86501	Poultry	Washington	9/17/17	USA:WA	USDA-FSIS		mdsA=COMPLETE,mdsB=COMPLETE
FSIS21720176	SAMN07662405	Enteritidis	182	3132	Poultry	Alabama	9/17/17	USA:AL	USDA-FSIS		mdsA=COMPLETE,mdsB=COMPLETE
FSIS21720189	SAMN07664343	Enteritidis	182	86912	Poultry	Washington	9/17/17	USA:WA	USDA-FSIS		mdsA=COMPLETE,mdsB=COMPLETE
FSIS21720208	SAMN07728451	Enteritidis	182	9202	Poultry	Washington	9/17/17	USA:WA	USDA-FSIS		mdsA=COMPLETE,mdsB=COMPLETE
FSIS21720219	SAMN07728619	Enteritidis	182	41659	Poultry	California	9/17/17	USA:CA	USDA-FSIS		mdsA=COMPLETE,mdsB=COMPLETE
FSIS21720305	SAMN07774188	Enteritidis	182	92117	Poultry	Washington	9/17/17	USA:WA	USDA-FSIS		mdsA=COMPLETE,mdsB=COMPLETE
FSIS21720356	SAMN07819007	Enteritidis	182	9202	Poultry	Washington	9/17/17	USA:WA	USDA-FSIS		mdsA=COMPLETE,mdsB=COMPLETE
FSIS21720638	SAMN08044515	Enteritidis	182	98265	Poultry	Virginia	9/17/17	USA:VA	USDA-FSIS		mdsA=COMPLETE,mdsB=COMPLETE
FSIS21720743	SAMN08176721	Enteritidis	182	102290	Poultry	Mississippi	9/17/17	USA:MS	USDA-FSIS		mdsA=COMPLETE,mdsB=COMPLETE
FSIS21720810	SAMN08239863	Enteritidis	182	101899	Poultry	South Carolina	9/17/17	USA:SC	USDA-FSIS		mdsA=COMPLETE,mdsB=COMPLETE
FSIS21720881	SAMN08273700	Enteritidis	182	73663	Poultry	Georgia	9/17/17	USA:GA	USDA-FSIS		mdsA=COMPLETE,mdsB=COMPLETE
FSIS21820929	SAMN08367416	Enteritidis	182	3334	Poultry	Louisiana	9/17/18	USA:LA	USDA-FSIS		mdsA=COMPLETE,mdsB=COMPLETE
FSIS21820932	SAMN08367419	Enteritidis	182	101899	Poultry	Florida	9/17/18	USA:FL	USDA-FSIS		mdsA=COMPLETE,mdsB=COMPLETE
FSIS21820940	SAMN08383751	Enteritidis	182	3132	Poultry	Illinois	9/17/18	USA:IL	USDA-FSIS		mdsA=COMPLETE,mdsB=COMPLETE
FSIS21820981	SAMN08384064	Enteritidis	182	41659	Poultry	Alabama	9/17/18	USA:AL	USDA-FSIS		mdsA=COMPLETE,mdsB=COMPLETE
FSIS21821070	SAMN08566112	Enteritidis	182	3334	Poultry	Wisconsin	9/17/18	USA:WI	USDA-FSIS		mdsA=COMPLETE,mdsB=COMPLETE
FSIS21821090	SAMN08566107	Enteritidis	182	41659	Poultry	Texas	9/17/18	USA:TX	USDA-FSIS		mdsA=COMPLETE,mdsB=COMPLETE
FSIS21821092	SAMN08536123	Enteritidis	182	182	Poultry	Delaware	9/17/18	USA:DE	USDA-FSIS		mdsA=COMPLETE,mdsB=COMPLETE
FSIS21821122	SAMN08568203	Enteritidis	182	3334	Poultry	North Carolina	9/17/18	USA:NC	USDA-FSIS		mdsA=COMPLETE,mdsB=COMPLETE
FSIS21821128	SAMN08629977	Enteritidis	182	41659	Poultry	Alabama	9/17/18	USA:AL	USDA-FSIS		mdsA=COMPLETE,mdsB=COMPLETE
FSIS21821129	SAMN08629978	Enteritidis	182	3334	Poultry	Alabama	9/17/18	USA:AL	USDA-FSIS		mdsA=COMPLETE,mdsB=COMPLETE
FSIS21821135	SAMN08629983	Enteritidis	182	182	Poultry	Illinois	9/17/18	USA:IL	USDA-FSIS		mdsA=COMPLETE,mdsB=COMPLETE
FSIS21821157	SAMN08624167	Enteritidis	182	3132	Poultry	Arkansas	9/17/18	USA:AR	USDA-FSIS		mdsA=COMPLETE,mdsB=COMPLETE
FSIS21821170	SAMN08624180	Enteritidis	182	3334	Poultry	Alabama	9/17/18	USA:AL	USDA-FSIS	sinH=PARTIUSA:AL	mdsA=COMPLETE,mdsB=COMPLETE
FSIS21821232	SAMN08668369	Enteritidis	182	152363	Poultry	Illinois	9/17/18	USA:IL	USDA-FSIS		mdsA=COMPLETE,mdsB=COMPLETE
FSIS21821239	SAMN08714127	Enteritidis	182	110298	Poultry	Alabama	9/17/18	USA:AL	USDA-FSIS		mdsA=COMPLETE,mdsB=COMPLETE
FSIS21821240	SAMN08714128	Enteritidis	182	101899	Poultry	Georgia	9/17/18	USA:GA	USDA-FSIS		mdsA=COMPLETE,mdsB=COMPLETE
FSIS21821260	SAMN08724002	Enteritidis	182	3132	Poultry	Mississippi	9/17/18	USA:MS	USDA-FSIS		mdsA=COMPLETE,mdsB=COMPLETE
FSIS21821283	SAMN08767364	Enteritidis	182	49220	Poultry	Mississippi	9/17/18	USA:MS	USDA-FSIS		mdsA=COMPLETE,mdsB=COMPLETE
FSIS21821284	SAMN08767365	Enteritidis	182	151974	Poultry	Virginia	9/17/18	USA:VA	USDA-FSIS		mdsA=COMPLETE,mdsB=COMPLETE
FSIS21821292	SAMN08767347	Enteritidis	182	152648	Poultry	California	9/17/18	USA:CA	USDA-FSIS		mdsA=COMPLETE,mdsB=COMPLETE
FSIS21821304	SAMN08767373	Enteritidis	182	49220	Poultry	Minnesota	9/17/18	USA:MN	USDA-FSIS		mdsA=COMPLETE,mdsB=COMPLETE
FSIS21821311	SAMN08767380	Enteritidis	182	182	Poultry	Virginia	9/17/18	USA:VA	USDA-FSIS		mdsA=COMPLETE,mdsB=COMPLETE
FSIS21821317	SAMN08792323	Enteritidis	182	114395	Poultry	Colorado	9/17/18	USA:CO	USDA-FSIS		mdsA=COMPLETE,mdsB=COMPLETE
FSIS21821324	SAMN08792327	Enteritidis	182	3132	Poultry	Texas	9/17/18	USA:TX	USDA-FSIS		mdsA=COMPLETE,mdsB=COMPLETE
FSIS21821340	SAMN08929365	Enteritidis	182	50778	Poultry	Alabama	9/17/18	USA:AL	USDA-FSIS		mdsA=COMPLETE,mdsB=COMPLETE
FSIS21821386	SAMN08848659	Enteritidis	182	3132	Poultry	Oklahoma	9/17/18	USA:OK	USDA-FSIS		mdsA=COMPLETE,mdsB=COMPLETE
FSIS21821439	SAMN08959328	Enteritidis	182	117572	Poultry	California	9/17/18	USA:CA	USDA-FSIS		mdsA=COMPLETE,mdsB=COMPLETE
FSIS21821469	SAMN08988047	Enteritidis	182	53714	Poultry	Virginia	9/17/18	USA:VA	USDA-FSIS		mdsA=COMPLETE,mdsB=COMPLETE
FSIS21821472	SAMN08988050	Enteritidis	182	53714	Poultry	Virginia	9/17/18	USA:VA	USDA-FSIS		mdsA=COMPLETE,mdsB=COMPLETE
FSIS21821483	SAMN08969974	Enteritidis	182	64255	Poultry	Illinois	9/17/18	USA:IL	USDA-FSIS		mdsA=COMPLETE,mdsB=COMPLETE
FSIS21821555	SAMN09076843	Enteritidis	182	98951	Poultry	Alabama	9/17/18	USA:AL	USDA-FSIS		mdsA=COMPLETE,mdsB=COMPLETE
FSIS21821684	SAMN09259699	Enteritidis	182	50778	Poultry	Alabama	9/17/18	USA:AL	USDA-FSIS		mdsA=COMPLETE,mdsB=COMPLETE
FSIS21821927	SAMN09829995	Enteritidis	182	3132	Poultry	Washington	9/17/18	USA:WA	USDA-FSIS		mdsA=COMPLETE,mdsB=COMPLETE
FSIS21822144	SAMN10090037	Enteritidis	182	3132	Poultry	Texas	9/17/18	USA:TX	USDA-FSIS		mdsA=COMPLETE,mdsB=COMPLETE
FSIS21822152	SAMN10112410	Enteritidis	182	49220	Poultry	Kentucky	9/17/18	USA:KY	USDA-FSIS		mdsA=COMPLETE,mdsB=COMPLETE
FSIS21822168	SAMN10112425	Enteritidis	182	3132	Poultry	Louisiana	9/17/18	USA:LA	USDA-FSIS		mdsA=COMPLETE,mdsB=COMPLETE
FSIS21822189	SAMN10141824	Enteritidis	182	3132	Poultry	Georgia	9/17/18	USA:GA	USDA-FSIS		mdsA=COMPLETE,mdsB=COMPLETE
FSIS21822276	SAMN10222491	Enteritidis	182	117653	Poultry	Alabama	9/17/18	USA:AL	USDA-FSIS		mdsA=COMPLETE,mdsB=COMPLETE
FSIS21822344	SAMN10248747	Enteritidis	182	50778	Poultry	Alabama	9/17/18	USA:AL	USDA-FSIS		mdsA=COMPLETE,mdsB=COMPLETE
FSIS21822480	SAMN10291157	Enteritidis	182	148358	Poultry	Delaware	9/17/18	USA:DE	USDA-FSIS		mdsA=COMPLETE,mdsB=COMPLETE
FSIS21822629	SAMN10390962	Enteritidis	182	117653	Poultry	Alabama	9/17/18	USA:AL	USDA-FSIS		mdsA=COMPLETE,mdsB=COMPLETE
FSIS21822682	SAMN10405210	Enteritidis	182	3334	Poultry	Georgia	9/17/18	USA:GA	USDA-FSIS		mdsA=COMPLETE,mdsB=COMPLETE
FSIS21822730	SAMN10440504	Enteritidis	182	153884	Poultry	Virginia	9/17/18	USA:VA	USDA-FSIS		mdsA=COMPLETE,mdsB=COMPLETE
FSIS21822764	SAMN10440524	Enteritidis	182	50778	Poultry	California	9/17/18	USA:CA	USDA-FSIS		mdsA=COMPLETE,mdsB=COMPLETE
FSIS21822863	SAMN10503964	Enteritidis	182	155990	Poultry	Georgia	9/17/18	USA:GA	USDA-FSIS		mdsA=COMPLETE,mdsB=COMPLETE
FSIS21822948	SAMN10574329	Enteritidis	182	162511	Poultry	Tennessee	9/17/18	USA:TN	USDA-FSIS		mdsA=COMPLETE,mdsB=COMPLETE
FSIS21822989	SAMN10588160	Enteritidis	182	162419	Poultry	Tennessee	9/17/18	USA:TN	USDA-FSIS		mdsA=COMPLETE,mdsB=COMPLETE
FSIS21823026	SAMN10644128	Enteritidis	182	163226	Poultry	Arkansas	9/17/18	USA:AR	USDA-FSIS		mdsA=COMPLETE,mdsB=COMPLETE
FSIS21923134	SAMN10700152	Enteritidis	182	161196	Poultry	South Carolina	9/17/18	USA:SC	USDA-FSIS		mdsA=COMPLETE,mdsB=COMPLETE
FSIS21923137	SAMN10700155	Enteritidis	182	161204	Poultry	Alabama	9/17/18	USA:AL	USDA-FSIS		mdsA=COMPLETE,mdsB=COMPLETE
FSIS21923146	SAMN10700139	Enteritidis	182	161194	Poultry	Illinois	9/17/18	USA:IL	USDA-FSIS		mdsA=COMPLETE,mdsB=COMPLETE
FSIS21923159	SAMN10719359	Enteritidis	182	164058	Poultry	Alabama	9/17/18	USA:AL	USDA-FSIS		mdsA=COMPLETE,mdsB=COMPLETE
FSIS31700017	SAMN08281265	Enteritidis	182	49220	Poultry	Mississippi	9/17/17	USA:MS	USDA-FSIS		mdsA=COMPLETE,mdsB=COMPLETE
FSIS31800047	SAMN08383765	Enteritidis	182	3334	Poultry	Texas	9/17/18	USA:TX	USDA-FSIS		mdsA=COMPLETE,mdsB=COMPLETE
FSIS31800049	SAMN08383767	Enteritidis	182	101927	Poultry	Georgia	9/17/17	USA:GA	USDA-FSIS		mdsA=COMPLETE,mdsB=COMPLETE
FSIS31800066	SAMN08432330	Enteritidis	182	182	Poultry	New Jersey	9/17/18	USA:NJ	USDA-FSIS	sinH=PARTIUSA:AL	mdsA=COMPLETE,mdsB=COMPLETE
FSIS31800079	SAMN08432338	Enteritidis	182	101927	Poultry	South Carolina	9/17/18	USA:SC	USDA-FSIS		mdsA=COMPLETE,mdsB=COMPLETE
FSIS31800084	SAMN08432342	Enteritidis	182	2668	Poultry	Virginia	9/17/18	USA:VA	USDA-FSIS		mdsA=COMPLETE,mdsB=COMPLETE
FSIS31800096	SAMN08467267	Enteritidis	182	108510	Poultry	Indiana	9/17/18	USA:IN	USDA-FSIS		mdsA=COMPLETE,mdsB=COMPLETE
FSIS31800172	SAMN08662368	Enteritidis	182	3334	Poultry	North Carolina	9/17/18	USA:NC	USDA-FSIS	sinH=PARTIUSA:AL	mdsA=COMPLETE,mdsB=COMPLETE
FSIS31800176	SAMN08623519	Enteritidis	182	49220	Poultry	Illinois	9/17/18	USA:IL	USDA-FSIS	sinH=PARTIUSA:AL	mdsA=COMPLETE,mdsB=COMPLETE
FSIS31800256	SAMN08848636	Enteritidis	182	64255	Poultry	California	9/17/18	USA:CA	USDA-FSIS		mdsA=COMPLETE,mdsB=COMPLETE
FSIS31800298	SAMN08866775	Enteritidis	182	3132	Poultry	Oklahoma	9/17/18	USA:OK	USDA-FSIS		mdsA=COMPLETE,mdsB=COMPLETE
FSIS31800306	SAMN08904788	Enteritidis	182	3132	Poultry	Oklahoma	9/17/18	USA:OK	USDA-FSIS		mdsA=COMPLETE,mdsB=COMPLETE
FSIS31800311	SAMN08934986	Enteritidis	182	3132	Poultry	Oklahoma	9/17/18	USA:OK	USDA-FSIS		mdsA=COMPLETE,mdsB=COMPLETE
FSIS31800328	SAMN08934993	Enteritidis	182	101927	Poultry	Alabama	9/17/18	USA:AL	USDA-FSIS		mdsA=COMPLETE,mdsB=COMPLETE
FSIS31800336	SAMN08974776	Enteritidis	182	3132	Poultry	Alabama	9/17/18	USA:AL	USDA-FSIS		mdsA=COMPLETE,mdsB=COMPLETE
FSIS31800348	SAMN08974764	Enteritidis	182	110535	Poultry	Georgia	9/17/18	USA:GA	USDA-FSIS		mdsA=COMPLETE,mdsB=COMPLETE
FSIS31800439	SAMN09259724	Enteritidis	182	3132	Poultry	Texas	9/17/18	USA:TX	USDA-FSIS		mdsA=COMPLETE,mdsB=COMPLETE
FSIS31800469	SAMN09259729	Enteritidis	182	53714	Poultry	Virginia	9/17/18	USA:VA	USDA-FSIS		mdsA=COMPLETE,mdsB=COMPLETE
FSIS31800497	SAMN09291740	Enteritidis	182	123968	Poultry	Florida	9/17/18	USA:FL	USDA-FSIS		mdsA=COMPLETE,mdsB=COMPLETE
FSIS31800499	SAMN09479025	Enteritidis	182	41659	Poultry	Colorado	9/17/18	USA:CO	USDA-FSIS		mdsA=COMPLETE,mdsB=COMPLETE
FSIS31800539	SAMN09389840	Enteritidis	182	125926	Poultry	Alabama	9/17/18	USA:AL	USDA-FSIS		mdsA=COMPLETE,mdsB=COMPLETE
FSIS31800573	SAMN09425903	Enteritidis	182	77806	Poultry	Washington	9/17/18	USA:WA	USDA-FSIS		mdsA=COMPLETE,mdsB=COMPLETE
FSIS31800577	SAMN09425907	Enteritidis	182	126985	Poultry	Alabama	9/17/18	USA:AL	USDA-FSIS		mdsA=COMPLETE,mdsB=COMPLETE
FSIS31800604	SAMN09460821	Enteritidis	182	3132	Poultry	Arkansas	9/17/18	USA:AR	USDA-FSIS		mdsA=COMPLETE,mdsB=COMPLETE
FSIS31800613	SAMN09479027	Enteritidis	182	3132	Poultry	Washington	9/17/18	USA:WA	USDA-FSIS		mdsA=COMPLETE,mdsB=COMPLETE
FSIS31800666	SAMN09532094	Enteritidis	182	3132	Poultry	Washington	9/17/18	USA:WA	USDA-FSIS		mdsA=COMPLETE,mdsB=COMPLETE
FSIS31800726	SAMN09651564	Enteritidis	182	2668	Poultry	Virginia	9/17/18	USA:VA	USDA-FSIS		mdsA=COMPLETE,mdsB=COMPLETE
FSIS31800735	SAMN09652706	Enteritidis	182	41659	Poultry	Texas	9/17/18	USA:TX	USDA-FSIS		mdsA=COMPLETE,mdsB=COMPLETE
FSIS31800739	SAMN09783486	Enteritidis	182	77806	Poultry	Washington	9/17/18	USA:WA	USDA-FSIS		mdsA=COMPLETE,mdsB=COMPLETE
FSIS31800941	SAMN09936823	Enteritidis	182	3334	Poultry	Georgia	9/17/18	USA:GA	USDA-FSIS		mdsA=COMPLETE,mdsB=COMPLETE
FSIS31800959	SAMN09950673	Enteritidis	182	3132	Poultry	California	9/17/18	USA:CA	USDA-FSIS		mdsA=COMPLETE,mdsB=COMPLETE
FSIS31801045	SAMN10112432	Enteritidis	182	182	Poultry	Georgia	9/17/18	USA:GA	USDA-FSIS		mdsA=COMPLETE,mdsB=COMPLETE
FSIS31801103	SAMN10161046	Enteritidis	182	146082	Poultry	Missouri	9/17/18	USA:MO	USDA-FSIS		mdsA=COMPLETE,mdsB=COMPLETE
FSIS31801158	SAMN10248729	Enteritidis	182	50778	Poultry	Alabama	9/17/18	USA:AL	USDA-FSIS		mdsA=COMPLETE,mdsB=COMPLETE
PNUSAS052504	SAMN09937761	Enteritidis	614	614	Human	Florida	6/5/18	USA:FL	CDC		mdsA=COMPLETE,mdsB=COMPLETE
PNUSAS044928	SAMN09650509	Enteritidis	614	614	Human	Florida	3/27/18	USA:FL	CDC	sinH=PARTIUSA:AL	mdsA=COMPLETE,mdsB=COMPLETE
PNUSAS040591	SAMN09206708	Enteritidis	614	614	Human	Florida	3/30/18	USA:FL	CDC		mdsA=COMPLETE,mdsB=COMPLETE
PNUSAS039210	SAMN08963962	Enteritidis	614	614	Human	Florida	3/1/18	USA:FL	CDC		mdsA=COMPLETE,mdsB=COMPLETE
PNUSAS028312	SAMN08053147	Enteritidis	614	614	Human	Florida	8/28/17	USA:FL	CDC		mdsA=COMPLETE,mdsB=COMPLETE
PNUSAS024341	SAMN07715090	Enteritidis	614	614	Human	Florida	6/13/17	USA:FL	CDC	sinH=PARTIUSA:AL	mdsA=COMPLETE,mdsB=COMPLETE
PNUSAS024613	SAMN07715097	Enteritidis	614	91448	Human	Florida	5/31/17	USA:FL	CDC		mdsA=COMPLETE,mdsB=COMPLETE
PNUSAS017031	SAMN07342225	Enteritidis	614	614	Human	Florida	6/7/17	USA:FL	CDC		mdsA=COMPLETE,mdsB=COMPLETE
PNUSAS013976	SAMN07197379	Enteritidis	614	614	Human	Florida	3/21/17	USA:FL	CDC		mdsA=COMPLETE,mdsB=COMPLETE
PNUSAS013881	SAMN07143119	Enteritidis	614	614	Human	Florida	3/29/17	USA:FL	CDC		mdsA=COMPLETE,mdsB=COMPLETE
PNUSAS012579	SAMN06847181	Enteritidis	614	614	Human	Florida	4/7/17	USA:FL	CDC		mdsA=COMPLETE,mdsB=COMPLETE
PNUSAS029004	SAMN08105173	Enteritidis	614	614	Human	Florida	11/2/17	USA:FL	CDC	sinH=PARTIUSA:AL	mdsA=COMPLETE,mdsB=COMPLETE
PNUSAS011229	SAMN06677817	Enteritidis	614	614	Human	Florida	3/12/17	USA:FL	CDC		mdsA=COMPLETE,mdsB=COMPLETE
PNUSAS039212	SAMN08963960	Enteritidis	614	614	Human	Florida	2/25/18	USA:FL	CDC		mdsA=COMPLETE,mdsB=COMPLETE
FSIS11704894	SAMN07835381	Enteritidis	614	614	Poultry	South Carolina	9/17/17	USA:SC	USDA-FSIS		mdsA=COMPLETE,mdsB=COMPLETE
FSIS11705707	SAMN08038003	Enteritidis	614	98146	Poultry	Massachusetts	9/17/17	USA:MA	USDA-FSIS		mdsA=COMPLETE,mdsB=COMPLETE
FSIS11705910	SAMN08114474	Enteritidis	614	614	Poultry	South Carolina	9/17/17	USA:SC	USDA-FSIS		mdsA=COMPLETE,mdsB=COMPLETE
FSIS11706844	SAMN08380271	Enteritidis	614	614	Poultry	Washington	9/17/17	USA:WA	USDA-FSIS		mdsA=COMPLETE,mdsB=COMPLETE
FSIS11807575	SAMN08513678	Enteritidis	614	109297	Poultry	South Carolina	9/17/18	USA:SC	USDA-FSIS		mdsA=COMPLETE,mdsB=COMPLETE
FSIS11807769	SAMN08581889	Enteritidis	614	614	Poultry	Georgia	9/17/18	USA:GA	USDA-FSIS		mdsA=COMPLETE,mdsB=COMPLETE
FSIS11808873	SAMN08909979	Enteritidis	614	614	Poultry	Massachusetts	9/17/18	USA:MA	USDA-FSIS		mdsA=COMPLETE,mdsB=COMPLETE
FSIS11809454	SAMN09222095	Enteritidis	614	614	Poultry	Massachusetts	9/17/18	USA:MA	USDA-FSIS		mdsA=COMPLETE,mdsB=COMPLETE
FSIS11810471	SAMN09395611	Enteritidis	614	614	Poultry	Georgia	9/17/18	USA:GA	USDA-FSIS		mdsA=COMPLETE,mdsB=COMPLETE
FSIS11810730	SAMN09444097	Enteritidis	614	614	Poultry	South Carolina	9/17/18	USA:SC	USDA-FSIS		mdsA=COMPLETE,mdsB=COMPLETE
FSIS11810980	SAMN09479644	Enteritidis	614	614	Poultry	South Carolina	9/17/18	USA:SC	USDA-FSIS		mdsA=COMPLETE,mdsB=COMPLETE
FSIS1700004	SAMN06701470	Enteritidis	614	614	Poultry	South Carolina	9/17/17	USA:SC	USDA-FSIS		mdsA=COMPLETE,mdsB=COMPLETE
FSIS1700534	SAMN06882371	Enteritidis	614	72379	Poultry	Massachusetts	9/17/17	USA:MA	USDA-FSIS		mdsA=COMPLETE,mdsB=COMPLETE
FSIS1700559	SAMN06899439	Enteritidis	614	68955	Poultry	South Carolina	9/17/17	USA:SC	USDA-FSIS		mdsA=COMPLETE,mdsB=COMPLETE
FSIS1701006	SAMN07151993	Enteritidis	614	614	Poultry	South Carolina	9/17/17	USA:SC	USDA-FSIS		mdsA=COMPLETE,mdsB=COMPLETE
FSIS1702112	SAMN07260883	Enteritidis	614	614	Poultry	Massachusetts	9/17/17	USA:MA	USDA-FSIS		mdsA=COMPLETE,mdsB=COMPLETE
FSIS1702162	SAMN07271446	Enteritidis	614	614	Poultry	South Carolina	9/17/17	USA:SC	USDA-FSIS		mdsA=COMPLETE,mdsB=COMPLETE
FSIS1702311	SAMN07371030	Enteritidis	614	614	Poultry	South Carolina	9/17/17	USA:SC	USDA-FSIS		mdsA=COMPLETE,mdsB=COMPLETE
FSIS1702441	SAMN07340728	Enteritidis	614	614	Poultry	South Carolina	9/17/17	USA:SC	USDA-FSIS		mdsA=COMPLETE,mdsB=COMPLETE
FSIS1710874	SAMN06638402	Enteritidis	614	614	Poultry	South Carolina	9/17/17	USA:SC	USDA-FSIS		mdsA=COMPLETE,mdsB=COMPLETE
FSIS21720868	SAMN08272557	Enteritidis	614	614	Poultry	Georgia	9/17/17	USA:GA	USDA-FSIS		mdsA=COMPLETE,mdsB=COMPLETE
FSIS21720874	SAMN08273694	Enteritidis	614	103657	Poultry	South Carolina	9/17/17	USA:SC	USDA-FSIS		mdsA=COMPLETE,mdsB=COMPLETE
FSIS21820914	SAMN08329925	Enteritidis	614	614	Poultry	South Carolina	9/17/17	USA:SC	USDA-FSIS		mdsA=COMPLETE,mdsB=COMPLETE
FSIS21820958	SAMN08384056	Enteritidis	614	106428	Poultry	Massachusetts	9/17/18	USA:MA	USDA-FSIS		mdsA=COMPLETE,mdsB=COMPLETE
FSIS21821108	SAMN08545434	Enteritidis	614	614	Poultry	California	9/17/18	USA:CA	USDA-FSIS		mdsA=COMPLETE,mdsB=COMPLETE
FSIS21821136	SAMN08629966	Enteritidis	614	614	Poultry	California	9/17/18	USA:CA	USDA-FSIS		mdsA=COMPLETE,mdsB=COMPLETE
FSIS21821394	SAMN08904772	Enteritidis	614	614	Poultry	New Jersey	9/17/18	USA:NJ	USDA-FSIS		mdsA=COMPLETE,mdsB=COMPLETE
FSIS21821577	SAMN09088254	Enteritidis	614	614	Poultry	Massachusetts	9/17/18	USA:MA	USDA-FSIS		mdsA=COMPLETE,mdsB=COMPLETE
FSIS21823019	SAMN10663757	Enteritidis	614	163446	Poultry	Florida	9/17/18	USA:FL	USDA-FSIS		mdsA=COMPLETE,mdsB=COMPLETE
FSIS31800050	SAMN08499072	Enteritidis	614	614	Poultry	South Carolina	9/17/18	USA:SC	USDA-FSIS		mdsA=COMPLETE,mdsB=COMPLETE
FSIS31800553	SAMN09399048	Enteritidis	614	152255	Poultry	Massachusetts	9/17/18	USA:MA	USDA-FSIS		mdsA=COMPLETE,mdsB=COMPLETE
FSIS31800921	SAMN09917766	Enteritidis	614	614	Poultry	South Carolina	9/17/18	USA:SC	USDA-FSIS		mdsA=COMPLETE,mdsB=COMPLETE
PNUSAS022594	SAMN07611387	Enteritidis	9391	86566	Human	Florida	6/5/17	USA:FL	CDC		aph(3'')-Ib=COMPLETE,aph(6)-Id=COMPLETE,blaTEM-1=COMPLETE,mdsA=COMPLETE,mdsB=COMPLETE,sul2=COMPLETE,tet(A)=COMPLETE
PNUSAS016449	SAMN07342183	Enteritidis	9391	78219	Human	Florida	4/4/17	USA:FL	CDC		aph(3'')-Ib=COMPLETE,aph(6)-Id=COMPLETE,blaTEM-1=COMPLETE,mdsA=COMPLETE,mdsB=COMPLETE,sul2=COMPLETE,sul2=PARTIUSA:AL_END_OF_CONTIG,tet(A)=COMPLETE,tet(A)=PARTIUSA:AL_END_OF_CONTIG
PNUSAS014741	SAMN07197360	Enteritidis	9391	74731	Human	Florida	4/5/17	USA:FL	CDC		aph(3'')-Ib=COMPLETE,aph(6)-Id=COMPLETE,blaTEM-1=COMPLETE,mdsA=COMPLETE,mdsB=COMPLETE,sul2=COMPLETE,tet(A)=COMPLETE
FSIS11810529	SAMN09521706	Enteritidis	9391	132238	Poultry	Georgia	9/17/18	USA:GA	USDA-FSIS		aph(3'')-Ib=COMPLETE,aph(6)-Id=COMPLETE,blaTEM-1=COMPLETE,mdsA=COMPLETE,mdsB=COMPLETE,sul2=COMPLETE,tet(A)=COMPLETE
FSIS11812194	SAMN09730239	Enteritidis	9391	138942	Poultry	Georgia	9/17/18	USA:GA	USDA-FSIS		aph(3'')-Ib=COMPLETE,aph(6)-Id=COMPLETE,blaTEM-1=COMPLETE,mdsA=COMPLETE,mdsB=COMPLETE,sul2=COMPLETE,tet(A)=COMPLETE
FSIS11917073	SAMN10884663	Enteritidis	9391	168054	Poultry	Georgia	9/17/18	USA:GA	USDA-FSIS		aph(3'')-Ib=COMPLETE,aph(6)-Id=COMPLETE,blaTEM-1=COMPLETE,mdsA=COMPLETE,mdsB=COMPLETE,sul2=COMPLETE,tet(A)=COMPLETE
FSIS1701015	SAMN07152342	Enteritidis	9391	9391	Poultry	Georgia	9/17/17	USA:GA	USDA-FSIS		mdsA=COMPLETE,mdsB=COMPLETE
FSIS1701972	SAMN07424833	Enteritidis	9391	80475	Poultry	Georgia	9/17/17	USA:GA	USDA-FSIS		aph(3'')-Ib=COMPLETE,aph(6)-Id=COMPLETE,blaTEM-1=COMPLETE,mdsA=COMPLETE,mdsB=COMPLETE,sul2=COMPLETE,tet(A)=COMPLETE
FSIS1710161	SAMN06291466	Enteritidis	9391	62805	Poultry	Georgia	9/17/17	USA:GA	USDA-FSIS		aph(3'')-Ib=COMPLETE,aph(6)-Id=COMPLETE,blaTEM-1=COMPLETE,mdsA=COMPLETE,mdsB=COMPLETE,sul2=COMPLETE,tet(A)=COMPLETE
FSIS1710265	SAMN06352045	Enteritidis	9391	62894	Poultry	Georgia	9/17/17	USA:GA	USDA-FSIS		aph(3'')-Ib=COMPLETE,aph(6)-Id=COMPLETE,blaTEM-1=COMPLETE,mdsA=COMPLETE,mdsB=COMPLETE,sul2=COMPLETE,tet(A)=COMPLETE
FSIS1710315	SAMN06295710	Enteritidis	9391	62894	Poultry	Georgia	9/17/17	USA:GA	USDA-FSIS		aph(3'')-Ib=COMPLETE,aph(6)-Id=COMPLETE,blaTEM-1=COMPLETE,mdsA=COMPLETE,mdsB=COMPLETE,sul2=COMPLETE,tet(A)=COMPLETE
FSIS21720678	SAMN08160275	Enteritidis	9391	101733	Poultry	New Jersey	9/17/17	USA:NJ	USDA-FSIS		aph(3'')-Ib=COMPLETE,aph(6)-Id=COMPLETE,blaTEM-1=COMPLETE,mdsA=COMPLETE,mdsB=COMPLETE,sul2=COMPLETE,tet(A)=COMPLETE
FSIS21821561	SAMN09076849	Enteritidis	9391	119878	Poultry	Georgia	9/17/18	USA:GA	USDA-FSIS		aph(3'')-Ib=COMPLETE,aph(6)-Id=COMPLETE,blaTEM-1=COMPLETE,mdsA=COMPLETE,mdsB=COMPLETE,sul2=COMPLETE,tet(A)=COMPLETE
FSIS31800259	SAMN08772939	Enteritidis	9391	111648	Poultry	Pennsylvania	9/17/18	USA:PA	USDA-FSIS		aph(3'')-Ib=COMPLETE,aph(6)-Id=COMPLETE,blaTEM-1=COMPLETE,mdsA=COMPLETE,mdsB=COMPLETE,sul2=COMPLETE,tet(A)=COMPLETE
FSIS31800280	SAMN08799018	Enteritidis	9391	62823	Poultry	Pennsylvania	9/17/18	USA:PA	USDA-FSIS		aph(3'')-Ib=COMPLETE,aph(6)-Id=COMPLETE,blaTEM-1=COMPLETE,mdsA=COMPLETE,mdsB=COMPLETE,sul2=COMPLETE,tet(A)=COMPLETE
PNUSAS056330	SAMN10141997	Enteritidis	10584	10584	Human	Florida	6/10/18	USA:FL	CDC		mdsA=COMPLETE,mdsB=COMPLETE
PNUSAS056331	SAMN10142009	Enteritidis	10584	10584	Human	Florida	6/12/18	USA:FL	CDC		mdsA=COMPLETE,mdsB=COMPLETE
PNUSAS056326	SAMN10142001	Enteritidis	10584	10584	Human	Florida	6/4/18	USA:FL	CDC	sinH=PARTIUSA:AL	mdsA=COMPLETE,mdsB=COMPLETE
PNUSAS056327	SAMN10142000	Enteritidis	10584	10584	Human	Florida	6/8/18	USA:FL	CDC		mdsA=COMPLETE,mdsB=COMPLETE
PNUSAS056329	SAMN10141998	Enteritidis	10584	10584	Human	Florida	6/8/18	USA:FL	CDC	sinH=PARTIUSA:AL	mdsA=COMPLETE,mdsB=COMPLETE
PNUSAS055173	SAMN10095891	Enteritidis	10584	10584	Human	Florida	6/3/18	USA:FL	CDC		mdsA=COMPLETE,mdsB=COMPLETE
PNUSAS055175	SAMN10095889	Enteritidis	10584	10584	Human	Florida	6/6/18	USA:FL	CDC		mdsA=COMPLETE,mdsB=COMPLETE
PNUSAS055176	SAMN10095888	Enteritidis	10584	10584	Human	Florida	6/4/18	USA:FL	CDC		mdsA=COMPLETE,mdsB=COMPLETE
PNUSAS056337	SAMN10142020	Enteritidis	10584	10584	Human	Florida	6/7/18	USA:FL	CDC		mdsA=COMPLETE,mdsB=COMPLETE
PNUSAS055166	SAMN10095865	Enteritidis	10584	10584	Human	Florida	5/25/18	USA:FL	CDC	sinH=PARTIUSA:AL	mdsA=COMPLETE,mdsB=COMPLETE
PNUSAS044522	SAMN09510578	Enteritidis	10584	10584	Human	Florida	5/20/18	USA:FL	CDC		mdsA=COMPLETE,mdsB=COMPLETE
PNUSAS044516	SAMN09510572	Enteritidis	10584	10584	Human	Florida	5/16/18	USA:FL	CDC		mdsA=COMPLETE,mdsB=COMPLETE
PNUSAS017667	SAMN07370937	Enteritidis	10584	12492	Human	Florida	4/17/17	USA:FL	CDC		mdsA=COMPLETE,mdsB=COMPLETE
FSIS11810426	SAMN09430549	Enteritidis	10584	10584	Poultry	Florida	9/17/18	USA:FL	USDA-FSIS		mdsA=COMPLETE,mdsB=COMPLETE
FSIS11811502	SAMN09633826	Enteritidis	10584	10584	Poultry	South Carolina	9/17/18	USA:SC	USDA-FSIS		mdsA=COMPLETE,mdsB=COMPLETE
FSIS11812027	SAMN09693203	Enteritidis	10584	10584	Poultry	Florida	9/17/18	USA:FL	USDA-FSIS		mdsA=COMPLETE,mdsB=COMPLETE
FSIS11813930	SAMN10064132	Enteritidis	10584	10584	Poultry	Florida	9/17/18	USA:FL	USDA-FSIS		mdsA=COMPLETE,mdsB=COMPLETE
FSIS21821291	SAMN08767346	Enteritidis	10584	151970	Poultry	Florida	9/17/18	USA:FL	USDA-FSIS		mdsA=COMPLETE,mdsB=COMPLETE
FSIS21821412	SAMN08959327	Enteritidis	10584	10584	Poultry	Florida	9/17/18	USA:FL	USDA-FSIS		mdsA=COMPLETE,mdsB=COMPLETE
FSIS21821728	SAMN09281204	Enteritidis	10584	10584	Poultry	Florida	9/17/18	USA:FL	USDA-FSIS		mdsA=COMPLETE,mdsB=COMPLETE
FSIS31801361	SAMN10661694	Enteritidis	10584	10584	Poultry	Florida	9/17/18	USA:FL	USDA-FSIS		mdsA=COMPLETE,mdsB=COMPLETE
PNUSAS048226	SAMN09744727	Enteritidis	62607	169280	Human	Florida	5/29/18	USA:FL	CDC	sinH=PARTIUSA:AL	mdsA=COMPLETE,mdsB=COMPLETE,tet(A)=COMPLETE
PNUSAS055784	SAMN10133815	Enteritidis	62607	62697	Human	Florida	5/30/18	USA:FL	CDC		mdsA=COMPLETE,mdsB=COMPLETE,tet(A)=COMPLETE
PNUSAS014737	SAMN07197356	Enteritidis	62607	62697	Human	Florida	4/26/17	USA:FL	CDC		mdsA=COMPLETE,mdsB=COMPLETE
FSIS11807892	SAMN08631239	Enteritidis	62607	152309	Poultry	Tennessee	9/17/18	USA:TN	USDA-FSIS		mdsA=COMPLETE,mdsB=COMPLETE,tet(A)=COMPLETE
FSIS11808864	SAMN08909970	Enteritidis	62607	116658	Poultry	Kansas	9/17/18	USA:PR	USDA-FSIS		mdsA=COMPLETE,mdsB=COMPLETE,tet(A)=COMPLETE
FSIS11809957	SAMN09233778	Enteritidis	62607	122234	Poultry	Kansas	9/17/18	USA:PR	USDA-FSIS		mdsA=COMPLETE,mdsB=COMPLETE,tet(A)=COMPLETE
FSIS11810912	SAMN09489560	Enteritidis	62607	62697	Poultry	Kansas	9/17/18	USA:PR	USDA-FSIS		mdsA=COMPLETE,mdsB=COMPLETE,tet(A)=COMPLETE
FSIS11811990	SAMN09684040	Enteritidis	62607	62697	Poultry	California	9/17/18	USA:CA	USDA-FSIS		mdsA=COMPLETE,mdsB=COMPLETE,tet(A)=COMPLETE
FSIS11812181	SAMN09730249	Enteritidis	62607	116658	Poultry	California	9/17/18	USA:CA	USDA-FSIS		mdsA=COMPLETE,mdsB=COMPLETE,tet(A)=COMPLETE
